# Supplementary material
Source: publisher figshare collection journal article supplement (https://gsajournals.figshare.com/ndownloader/files/13384037)
Supplement: Supplementary file 1 [file 13384037]

## Sheet: SLB
trait	plot_nrsry	year	location	rep	block	range	row	field_block	plot_xprmnt	pedigree	entry	dta	sc1	sc2	sc3	sc4	eh	ph	audpc
SLB	8694	2014	1	1	1	34	1	1	1	NC304xOh7B	DRIL68.105	69	7	7	6	2	38	46	5.5
SLB	8696	2014	1	1	1	34	3	1	3	NC304xOh7B	DRIL68.082	66	7.5	7.5	6.5	5.5	35	37	6.7
SLB	8697	2014	1	1	1	34	4	1	4	NC304xOh7B	DRIL68.024	68	6.5	6	5	3.5	51	50	5.2
SLB	8700	2014	1	1	1	34	7	1	7	NC304xOh7B	DRIL68.118	66	7.5	7.5	6.5	6.5	47	28	6.9
SLB	8701	2014	1	1	1	34	8	1	8	NC304xOh7B	DRIL68.007	66	7	6.5	5	3.5	56	58	5.4
SLB	8702	2014	1	1	1	34	9	1	9	NC304xOh7B	DRIL68.091	68	7	6.5	5	4	60	58	5.5
SLB	8703	2014	1	1	1	34	10	1	10	NC304xOh7B	DRIL68.126	68	7	7	6	4	3	54	6
SLB	8704	2014	1	1	1	34	11	1	11	NC304xOh7B	DRIL68.076	68	7.5	7	6.5	3	56	58	6
SLB	8705	2014	1	1	1	34	12	1	12	NC304xOh7B	DRIL68.018	66	8	7	7	6	47	54	6.9
SLB	8707	2014	1	1	1	34	14	1	14	NC304xOh7B	DRIL68.044	70	6.5	6.5	6	3.5	5	60	5.7
SLB	8708	2014	1	1	1	34	15	1	15	NC304xOh7B	DRIL68.070	66	7.5	7.5	6.5	5.5	42	25	6.7
SLB	8709	2014	1	1	1	34	16	1	16	NC304xOh7B	DRIL68.099	70	7.5	7.5	6	5	3	41	6.4
SLB	8710	2014	1	1	1	34	17	1	17	NC304xOh7B	DRIL68.101	69	7.5	7.5	6	5	51	28	6.4
SLB	8711	2014	1	1	2	34	18	1	18	NC304xOh7B	DRIL68.060	70	7.5	7.5	6.5	6	3	37	6.8
SLB	8712	2014	1	1	2	34	19	1	19	NC304xOh7B	DRIL68.062	70	7.5	7.5	6.5	6	63	54	6.8
SLB	8714	2014	1	1	2	34	21	1	21	NC304xOh7B	DRIL68.033	70	8	8	7.5	5.5	3	50	7.3
SLB	8717	2014	1	1	2	34	24	1	24	NC304xOh7B	DRIL68.127	68	8.5	8	7.5	7	3	58	7.7
SLB	8718	2014	1	1	2	34	25	1	25	NC304xOh7B	DRIL68.103	68	8	7.5	6.5	5.5	51	69	6.8
SLB	8720	2014	1	1	2	34	27	1	27	NC304xOh7B	DRIL68.040	70	8	7.5	7.5	7	42	41	7.5
SLB	8721	2014	1	1	2	34	28	1	28	NC304xOh7B	DRIL68.100	70	8.5	8.5	8	7.5	51	58	8.1
SLB	8724	2014	1	1	2	35	26	1	31	NC304xOh7B	DRIL68.116	70	7.5	7.5	6.5	4	5	58	6.4
SLB	8727	2014	1	1	2	35	23	1	34	NC304xOh7B	DRIL68.036	66	7.5	7	6.5	5.5	3	62	6.6
SLB	8728	2014	1	1	3	35	22	1	35	NC304xOh7B	DRIL68.092	70	8	8	8	7.5	56	54	7.9
SLB	8729	2014	1	1	3	35	21	1	36	NC304xOh7B	DRIL68.096	71	7.5	7.5	7	5	35	28	6.8
SLB	8730	2014	1	1	3	35	20	1	37	NC304xOh7B	DRIL68.094	70	7.5	7	6	2	5	65	5.6
SLB	8731	2014	1	1	3	35	19	1	38	NC304xOh7B	DRIL68.083	69	7.5	7	6	5	29	17	6.3
SLB	8732	2014	1	1	3	35	18	1	39	NC304xOh7B	DRIL68.015	71	7.5	7.5	6.5	5	60	58	6.6
SLB	8733	2014	1	1	3	35	17	1	40	NC304xOh7B	DRIL68.055	71	8	7.5	7.5	6.5	3	65	7.4
SLB	8734	2014	1	1	3	35	16	1	41	NC304xOh7B	DRIL68.072	69	7.5	7.5	7	5	5	65	6.8
SLB	8735	2014	1	1	3	35	15	1	42	NC304xOh7B	DRIL68.071	69	8	8	7.5	7.5	6	57	7.7
SLB	8738	2014	1	1	3	35	12	1	45	NC304xOh7B	DRIL68.002	66	7.5	7	6.5	5.5	3	41	6.6
SLB	8739	2014	1	1	3	35	11	1	46	NC304xOh7B	DRIL68.032	67	7.5	7	6	5	63	64	6.3
SLB	8740	2014	1	1	3	35	10	1	47	NC304xOh7B	DRIL68.039	66	7.5	7.5	7.5	5.5	60	69	7.1
SLB	8742	2014	1	1	3	35	8	1	49	NC304xOh7B	DRIL68.077	67	7.5	7	6.5	5	6	65	6.5
SLB	8743	2014	1	1	3	35	7	1	50	NC304xOh7B	DRIL68.074	70	8.5	8	8	7.5	51	52	8
SLB	8744	2014	1	1	3	35	6	1	51	NC304xOh7B	DRIL68.085	66	7	7	6	4	47	32	6
SLB	8745	2014	1	1	4	35	5	1	52	NC304xOh7B	DRIL68.117	67	8	7.5	7	6.5	42	25	7.2
SLB	8747	2014	1	1	4	35	3	1	54	NC304xOh7B	DRIL68.119	69	7.5	7.5	7	5	42	28	6.8
SLB	8748	2014	1	1	4	35	2	1	55	NC304xOh7B	DRIL68.005	68	7.5	7	6.5	5	63	65	6.5
SLB	8749	2014	1	1	4	35	1	1	56	NC304xOh7B	DRIL68.027	68	7.5	7	6.5	4.5	60	50	6.3
SLB	8750	2014	1	1	4	36	1	1	57	NC304xOh7B	DRIL68.037	69	7.5	7	6	4.5	56	62	6.2
SLB	8753	2014	1	1	4	36	4	1	60	NC304xOh7B	DRIL68.123	67	7.5	7	6.5	4	29	6	6.2
SLB	8754	2014	1	1	4	36	5	1	61	NC304xOh7B	DRIL68.046	67	7.5	7	6.5	5	60	65	6.5
SLB	8755	2014	1	1	4	36	6	1	62	NC304xOh7B	DRIL68.112	69	7.5	7	6	5.5	60	64	6.4
SLB	8758	2014	1	1	4	36	9	1	65	NC304xOh7B	DRIL68.004	65	8	7.5	7	5	56	69	6.8
SLB	8762	2014	1	1	5	36	13	1	69	NC304xOh7B	DRIL68.030	70	8	7.5	6.5	6	3	54	6.9
SLB	8764	2014	1	1	5	36	15	1	71	NC304xOh7B	DRIL68.014	67	7.5	7.5	6	4	5	50	6.2
SLB	8765	2014	1	1	5	36	16	1	72	NC304xOh7B	DRIL68.089	67	7.5	7.5	5.5	4.5	60	69	6.1
SLB	8766	2014	1	1	5	36	17	1	73	NC304xOh7B	DRIL68.068	67	7.5	7.5	6.5	5	3	62	6.6
SLB	8767	2014	1	1	5	36	18	1	74	NC304xOh7B	DRIL68.043	67	7.5	7	5.5	2	5	54	5.4
SLB	8769	2014	1	1	5	36	20	1	76	NC304xOh7B	DRIL68.049	69	7.5	7	5.5	4	3	65	5.9
SLB	8771	2014	1	1	5	36	22	1	78	NC304xOh7B	DRIL68.012	67	7.5	7	7	6	60	68	6.9
SLB	8772	2014	1	1	5	36	23	1	79	NC304xOh7B	DRIL68.125	66	7.5	7.5	5.5	5	38	28	6.2
SLB	8773	2014	1	1	5	36	24	1	80	NC304xOh7B	DRIL68.035	68	7	6.5	4	1	51	48	4.5
SLB	8774	2014	1	1	5	36	25	1	81	NC304xOh7B	DRIL68.028	68	7.5	7	7	5.5	56	69	6.7
SLB	8775	2014	1	1	5	36	26	1	82	NC304xOh7B	DRIL68.104	68	7.5	7	6	4	42	46	6.1
SLB	8776	2014	1	1	5	36	27	1	83	NC304xOh7B	DRIL68.029	68	7.5	7	5.5	4	47	58	5.9
SLB	8778	2014	1	1	5	37	28	1	85	NC304xOh7B	DRIL68.111	66	8	8	7	5	42	32	7
SLB	8779	2014	1	1	6	37	27	1	86	NC304xOh7B	DRIL68.038	67	7.5	7.5	7	5	3	62	6.8
SLB	8780	2014	1	1	6	37	26	1	87	NC304xOh7B	DRIL68.102	70	7.5	7.5	6	5	42	13	6.4
SLB	8781	2014	1	1	6	37	25	1	88	NC304xOh7B	DRIL68.034	69	8	8	7.5	5	42	13	7.2
SLB	8782	2014	1	1	6	37	24	1	89	NC304xOh7B	DRIL68.022	67	7.5	7	6.5	5.5	5	66	6.6
SLB	8786	2014	1	1	6	37	20	1	93	NC304xOh7B	DRIL68.054	67	7.5	7	5.5	3	63	69	5.7
SLB	8787	2014	1	1	6	37	19	1	94	NC304xOh7B	DRIL68.114	68	7.5	7	5	3	51	58	5.5
SLB	8789	2014	1	1	6	37	17	1	96	NC304xOh7B	DRIL68.075	68	7	7	5	3	63	58	5.4
SLB	8791	2014	1	1	6	37	15	1	98	NC304xOh7B	DRIL68.073	66	8	7.5	6	5.5	47	62	6.6
SLB	8792	2014	1	1	6	37	14	1	99	NC304xOh7B	DRIL68.086	69	7	6.5	5.5	4	56	65	5.7
SLB	8793	2014	1	1	6	37	13	1	100	NC304xOh7B	DRIL68.026	69	7.5	7	5	3	42	58	5.5
SLB	8794	2014	1	1	6	37	12	1	101	NC304xOh7B	DRIL68.056	66	8	7.5	6.5	4	42	50	6.4
SLB	8795	2014	1	1	6	37	11	1	102	NC304xOh7B	DRIL68.115	66	7	7	6	3	56	41	5.8
SLB	8796	2014	1	1	7	37	10	1	103	NC304xOh7B	DRIL68.078	66	7.5	7	6	4	60	73	6.1
SLB	8797	2014	1	1	7	37	9	1	104	NC304xOh7B	DRIL68.109	66	8	8	8	7.5	63	62	7.9
SLB	8798	2014	1	1	7	37	8	1	105	NC304xOh7B	DRIL68.051	66	8	7.5	7	6	6	71	7.1
SLB	8799	2014	1	1	7	37	7	1	106	NC304xOh7B	DRIL68.031	66	7.5	7	5	3	47	34	5.5
SLB	8801	2014	1	1	7	37	5	1	108	NC304xOh7B	DRIL68.095	66	8	7.5	7	5.5	60	66	7
SLB	8802	2014	1	1	7	37	4	1	109	NC304xOh7B	DRIL68.016	69	7	7	6	5.5	60	65	6.3
SLB	8803	2014	1	1	7	37	3	1	110	NC304xOh7B	DRIL68.106	69	7.5	7.5	6	5	47	37	6.4
SLB	8805	2014	1	1	7	37	1	1	112	NC304xOh7B	DRIL68.008	70	8	7.5	6.5	5	51	46	6.7
SLB	8807	2014	1	1	7	38	2	1	114	NC304xOh7B	DRIL68.061	70	7.5	7.5	5.5	4	42	43	6
SLB	8808	2014	1	1	7	38	3	1	115	NC304xOh7B	DRIL68.108	71	7.5	7.5	7.5	6	42	54	7.2
SLB	8811	2014	1	1	7	38	6	1	118	NC304xOh7B	DRIL68.017	69	8	7.5	7	5	3	62	6.8
SLB	8812	2014	1	1	7	38	7	1	119	NC304xOh7B	DRIL68.053	69	7.5	7.5	6.5	4	63	69	6.4
SLB	8813	2014	1	1	8	38	8	1	120	NC304xOh7B	DRIL68.087	68	7.5	7	6	4.5	9	74	6.2
SLB	8814	2014	1	1	8	38	9	1	121	NC304xOh7B	DRIL68.003	69	8	7.5	6.5	5.5	60	46	6.8
SLB	8815	2014	1	1	8	38	10	1	122	NC304xOh7B	DRIL68.081	69	8	7.5	6.5	6	60	60	6.9
SLB	8816	2014	1	1	8	38	11	1	123	NC304xOh7B	DRIL68.064	66	7.5	7	6	4.5	6	74	6.2
SLB	8818	2014	1	1	8	38	13	1	125	NC304xOh7B	DRIL68.122	66	8	7.5	7.5	7	60	50	7.5
SLB	8820	2014	1	1	8	38	15	1	127	NC304xOh7B	DRIL68.063	68	7.5	7.5	6.5	5	60	50	6.6
SLB	8821	2014	1	1	8	38	16	1	128	NC304xOh7B	DRIL68.090	67	7.5	7.5	6	4.5	63	67	6.3
SLB	8822	2014	1	1	8	38	17	1	129	NC304xOh7B	DRIL68.041	69	8	7.5	7.5	7	29	9	7.5
SLB	8823	2014	1	1	8	38	18	1	130	NC304xOh7B	DRIL68.052	68	7.5	7	6	3	51	58	5.8
SLB	8824	2014	1	1	8	38	19	1	131	NC304xOh7B	DRIL68.048	66	7.5	7	6	2	38	50	5.6
SLB	8825	2014	1	1	8	38	20	1	132	NC304xOh7B	DRIL68.019	68	7.5	7.5	7	5.5	51	57	6.9
SLB	8826	2014	1	1	8	38	21	1	133	NC304xOh7B	DRIL68.010	71	8	7.5	7	7	5	68	7.3
SLB	8827	2014	1	1	8	38	22	1	134	NC304xOh7B	DRIL68.088	71	8.5	8	7.5	7.5	3	52	7.8
SLB	8829	2014	1	1	8	38	24	1	136	NC304xOh7B	DRIL68.067	67	8	8	8	7	7	75	7.8
SLB	8830	2014	1	1	9	38	25	1	137	NC304xOh7B	DRIL68.006	67	7.5	7.5	6.5	6	60	62	6.8
SLB	8831	2014	1	1	9	38	26	1	138	NC304xOh7B	DRIL68.098	69	7.5	7	6	5	56	41	6.3
SLB	8832	2014	1	1	9	38	27	1	139	NC304xOh7B	DRIL68.047	68	7.5	7	6	4	5	62	6.1
SLB	8833	2014	1	1	9	38	28	1	140	NC304xOh7B	DRIL68.021	66	7.5	7.5	6.5	6	3	62	6.8
SLB	8836	2014	1	1	9	39	26	1	143	NC304xOh7B	DRIL68.084	68	7.5	7.5	6	4.5	6	65	6.3
SLB	8838	2014	1	1	9	39	24	1	145	NC304xOh7B	DRIL68.042	69	8	7.5	7	6.5	63	58	7.2
SLB	8839	2014	1	1	9	39	23	1	146	NC304xOh7B	DRIL68.121	68	8	7.5	7.5	7	56	62	7.5
SLB	8840	2014	1	1	9	39	22	1	147	NC304xOh7B	DRIL68.097	69	8.5	8	7.5	7	38	25	7.7
SLB	8841	2014	1	1	9	39	21	1	148	NC304xOh7B	DRIL68.080	68	7.5	7.5	6.5	5	60	67	6.6
SLB	8842	2014	1	1	9	39	20	1	149	NC304xOh7B	DRIL68.023	67	7.5	7.5	6	5	60	54	6.4
SLB	8844	2014	1	1	9	39	18	1	151	NC304xOh7B	DRIL68.025	70	8	8	8	7.5	51	41	7.9
SLB	8845	2014	1	1	9	39	17	1	152	NC304xOh7B	DRIL68.069	70	8	7.5	7.5	6	60	39	7.2
SLB	12177	2014	1	2	1	28	21	1	154	NC304xOh7B	DRIL68.127	70	8	8	7.5	6	44	47	7.4
SLB	12180	2014	1	2	1	28	24	1	157	NC304xOh7B	DRIL68.003	71	7.5	7.5	7	5	47	52	6.8
SLB	12181	2014	1	2	1	28	25	1	158	NC304xOh7B	DRIL68.085	71	8	8	7	5	38	37	7
SLB	12183	2014	1	2	1	28	27	1	160	NC304xOh7B	DRIL68.016	69	8	7.5	6.5	4.5	48	58	6.6
SLB	12184	2014	1	2	1	28	28	1	161	NC304xOh7B	DRIL68.076	70	7	7	6	3	46	50	5.8
SLB	12185	2014	1	2	1	29	28	1	162	NC304xOh7B	DRIL68.027	67	7.5	7.5	5.5	3	38	35	5.8
SLB	12186	2014	1	2	1	29	27	1	163	NC304xOh7B	DRIL68.012	NA	NA	NA	NA	NA	NA	NA	NA
SLB	12188	2014	1	2	1	29	25	1	165	NC304xOh7B	DRIL68.102	72	7	7	6	4	38	25	6
SLB	12190	2014	1	2	1	29	23	1	167	NC304xOh7B	DRIL68.092	71	8	8	7	5	42	37	7
SLB	12192	2014	1	2	1	29	21	1	169	NC304xOh7B	DRIL68.080	70	7.5	7	5	3	41	44	5.5
SLB	12194	2014	1	2	2	29	19	1	171	NC304xOh7B	DRIL68.115	70	7.5	7.5	5.5	3.5	51	42	5.9
SLB	12196	2014	1	2	2	29	17	1	173	NC304xOh7B	DRIL68.019	70	7	6.5	5.5	3.5	32	34	5.6
SLB	12197	2014	1	2	2	29	16	1	174	NC304xOh7B	DRIL68.051	70	7.5	7.5	6.5	5	34	25	6.6
SLB	12199	2014	1	2	2	29	14	1	176	NC304xOh7B	DRIL68.039	67	7.5	7.5	7	5.5	42	29	6.9
SLB	12200	2014	1	2	2	29	13	1	177	NC304xOh7B	DRIL68.104	70	7.5	7	5	2	29	8	5.3
SLB	12201	2014	1	2	2	29	12	1	178	NC304xOh7B	DRIL68.123	67	7.5	7.5	6.5	5	30	16	6.6
SLB	12202	2014	1	2	2	29	11	1	179	NC304xOh7B	DRIL68.101	67	7.5	7	6	4	42	26	6.1
SLB	12203	2014	1	2	2	29	10	1	180	NC304xOh7B	DRIL68.048	67	8	7	6	4	38	30	6.1
SLB	12204	2014	1	2	2	29	9	1	181	NC304xOh7B	DRIL68.035	68	6.5	5	4	1	45	22	4
SLB	12205	2014	1	2	2	29	8	1	182	NC304xOh7B	DRIL68.094	69	7	7	6.5	3	50	28	5.9
SLB	12208	2014	1	2	2	29	5	1	185	NC304xOh7B	DRIL68.023	70	7	7	6.5	3.5	45	26	6.1
SLB	12209	2014	1	2	2	29	4	1	186	NC304xOh7B	DRIL68.007	70	6	6	5	3.5	39	28	5.1
SLB	12210	2014	1	2	2	29	3	1	187	NC304xOh7B	DRIL68.026	70	7	7	5.5	3	33	4	5.6
SLB	12211	2014	1	2	3	29	2	1	188	NC304xOh7B	DRIL68.075	69	6	6	5	2	32	15	4.8
SLB	12214	2014	1	2	3	30	2	1	191	NC304xOh7B	DRIL68.125	NA	NA	NA	NA	NA	NA	NA	NA
SLB	12215	2014	1	2	3	30	3	1	192	NC304xOh7B	DRIL68.088	71	7.5	7	7	6.5	45	7	7
SLB	12216	2014	1	2	3	30	4	1	193	NC304xOh7B	DRIL68.024	71	7	7	6	4	47	22	6
SLB	12217	2014	1	2	3	30	5	1	194	NC304xOh7B	DRIL68.043	69	7	6	5.5	2	38	10	5.1
SLB	12219	2014	1	2	3	30	7	1	196	NC304xOh7B	DRIL68.082	70	7	6	5.5	4	38	28	5.5
SLB	12222	2014	1	2	3	30	10	1	199	NC304xOh7B	DRIL68.021	NA	NA	NA	NA	NA	NA	NA	NA
SLB	12223	2014	1	2	3	30	11	1	200	NC304xOh7B	DRIL68.006	67	8	7	6	5.5	38	39	6.5
SLB	12224	2014	1	2	3	30	12	1	201	NC304xOh7B	DRIL68.032	67	7.5	6	5	2	38	37	5
SLB	12225	2014	1	2	3	30	13	1	202	NC304xOh7B	DRIL68.106	71	7	7	4.5	1	35	13	4.8
SLB	12226	2014	1	2	3	30	14	1	203	NC304xOh7B	DRIL68.017	NA	NA	NA	NA	NA	NA	NA	NA
SLB	12227	2014	1	2	3	30	15	1	204	NC304xOh7B	DRIL68.055	67	7.5	7	5	4	42	33	5.7
SLB	12228	2014	1	2	4	30	16	1	205	NC304xOh7B	DRIL68.049	71	7	7.5	5	2	48	52	5.3
SLB	12229	2014	1	2	4	30	17	1	206	NC304xOh7B	DRIL68.014	67	7	7	5	2	42	22	5.2
SLB	12230	2014	1	2	4	30	18	1	207	NC304xOh7B	DRIL68.071	71	8	7.5	7.5	6.5	60	54	7.4
SLB	12232	2014	1	2	4	30	20	1	209	NC304xOh7B	DRIL68.042	71	7.5	7.5	6	5	60	46	6.4
SLB	12233	2014	1	2	4	30	21	1	210	NC304xOh7B	DRIL68.078	71	7.5	7.5	5.5	3	47	49	5.8
SLB	12234	2014	1	2	4	30	22	1	211	NC304xOh7B	DRIL68.041	71	8	7.5	7	5.5	47	28	7
SLB	12235	2014	1	2	4	30	23	1	212	NC304xOh7B	DRIL68.025	71	8	7.5	7.5	7	56	49	7.5
SLB	12236	2014	1	2	4	30	24	1	213	NC304xOh7B	DRIL68.008	NA	8	8	8	7.5	12	78	7.9
SLB	12238	2014	1	2	4	30	26	1	215	NC304xOh7B	DRIL68.119	71	7.5	7	6	4	37	35	6.1
SLB	12239	2014	1	2	4	30	27	1	216	NC304xOh7B	DRIL68.081	70	7	7	5.5	3	59	47	5.6
SLB	12240	2014	1	2	4	30	28	1	217	NC304xOh7B	DRIL68.114	70	7.5	7	4.5	3.5	42	53	5.4
SLB	12241	2014	1	2	4	31	28	1	218	NC304xOh7B	DRIL68.046	67	7.5	7	6	3.5	51	47	5.9
SLB	12244	2014	1	2	4	31	25	1	221	NC304xOh7B	DRIL68.099	72	7.5	7	6	4	47	39	6.1
SLB	12245	2014	1	2	5	31	24	1	222	NC304xOh7B	DRIL68.022	72	6.5	7.5	6	5	61	56	6.3
SLB	12246	2014	1	2	5	31	23	1	223	NC304xOh7B	DRIL68.112	72	7.5	7.5	7	5	42	62	6.8
SLB	12247	2014	1	2	5	31	22	1	224	NC304xOh7B	DRIL68.037	70	7.5	7	6	2	52	62	5.6
SLB	12250	2014	1	2	5	31	19	1	227	NC304xOh7B	DRIL68.015	71	7	7	6	5	14	61	6.2
SLB	12251	2014	1	2	5	31	18	1	228	NC304xOh7B	DRIL68.126	70	7	7	5.5	1	47	37	5.1
SLB	12253	2014	1	2	5	31	16	1	230	NC304xOh7B	DRIL68.061	70	7	7	6	3.5	60	51	5.9
SLB	12254	2014	1	2	5	31	15	1	231	NC304xOh7B	DRIL68.069	66	7	7	6	3	50	31	5.8
SLB	12255	2014	1	2	5	31	14	1	232	NC304xOh7B	DRIL68.067	69	7.5	7.5	6	5.5	64	59	6.5
SLB	12257	2014	1	2	5	31	12	1	234	NC304xOh7B	DRIL68.062	70	7	7.5	5.5	4	38	24	5.9
SLB	12259	2014	1	2	5	31	10	1	236	NC304xOh7B	DRIL68.111	71	6.5	5	5	1	38	8	4.3
SLB	12260	2014	1	2	5	31	9	1	237	NC304xOh7B	DRIL68.040	72	7.5	7	6.5	5.5	42	25	6.6
SLB	12261	2014	1	2	5	31	8	1	238	NC304xOh7B	DRIL68.090	67	7.5	6.5	4	1	56	46	4.5
SLB	12262	2014	1	2	6	31	7	1	239	NC304xOh7B	DRIL68.077	69	7.5	7	5	2	35	23	5.3
SLB	12263	2014	1	2	6	31	6	1	240	NC304xOh7B	DRIL68.105	67	7	7	5	2	32	6	5.2
SLB	12264	2014	1	2	6	31	5	1	241	NC304xOh7B	DRIL68.073	67	7.5	6.5	5	4	47	38	5.6
SLB	12266	2014	1	2	6	31	3	1	243	NC304xOh7B	DRIL68.083	71	7.5	7	6.5	5	37	32	6.5
SLB	12267	2014	1	2	6	31	2	1	244	NC304xOh7B	DRIL68.052	NA	NA	NA	NA	NA	NA	NA	NA
SLB	12268	2014	1	2	6	31	1	1	245	NC304xOh7B	DRIL68.118	66	8	7	6.5	5	21	1	6.5
SLB	12269	2014	1	2	6	32	1	1	246	NC304xOh7B	DRIL68.031	67	6	7.5	5.5	4	37	21	5.8
SLB	12272	2014	1	2	6	32	4	1	249	NC304xOh7B	DRIL68.095	67	7.5	7.5	6	3.5	31	41	6.1
SLB	12273	2014	1	2	6	32	5	1	250	NC304xOh7B	DRIL68.056	67	8	7.5	5	3.5	38	16	5.8
SLB	12275	2014	1	2	6	32	7	1	252	NC304xOh7B	DRIL68.005	67	7.5	7	5.5	4	51	51	5.9
SLB	12276	2014	1	2	6	32	8	1	253	NC304xOh7B	DRIL68.097	68	8	7.5	6	4	42	8	6.3
SLB	12277	2014	1	2	6	32	9	1	254	NC304xOh7B	DRIL68.028	70	7	7.5	5	2	51	44	5.3
SLB	12278	2014	1	2	6	32	10	1	255	NC304xOh7B	DRIL68.004	67	6.5	6	4	2	32	34	4.5
SLB	12281	2014	1	2	7	32	13	1	258	NC304xOh7B	DRIL68.089	71	7	6	6	4	60	42	5.7
SLB	12282	2014	1	2	7	32	14	1	259	NC304xOh7B	DRIL68.121	68	7	6	5	4	38	32	5.3
SLB	12283	2014	1	2	7	32	15	1	260	NC304xOh7B	DRIL68.087	68	7	6	5	2	60	50	4.9
SLB	12284	2014	1	2	7	32	16	1	261	NC304xOh7B	DRIL68.033	68	7	6	4	3	59	32	4.8
SLB	12286	2014	1	2	7	32	18	1	263	NC304xOh7B	DRIL68.091	67	7	6	5	2	51	38	4.9
SLB	12287	2014	1	2	7	32	19	1	264	NC304xOh7B	DRIL68.036	67	7	6.5	5	4	56	46	5.5
SLB	12288	2014	1	2	7	32	20	1	265	NC304xOh7B	DRIL68.054	70	7.5	7	6	5	65	58	6.3
SLB	12289	2014	1	2	7	32	21	1	266	NC304xOh7B	DRIL68.122	70	8	7.5	7.5	6.5	51	41	7.4
SLB	12291	2014	1	2	7	32	23	1	268	NC304xOh7B	DRIL68.018	71	8	7.5	7	6	43	43	7.1
SLB	12292	2014	1	2	7	32	24	1	269	NC304xOh7B	DRIL68.074	71	8	8	8	7.5	60	62	7.9
SLB	12294	2014	1	2	7	32	26	1	271	NC304xOh7B	DRIL68.108	72	8	8	7	6	60	33	7.2
SLB	12295	2014	1	2	7	32	27	1	272	NC304xOh7B	DRIL68.002	67	7.5	7	5.5	4.5	63	42	6
SLB	12296	2014	1	2	8	32	28	1	273	NC304xOh7B	DRIL68.116	71	7	7	5.5	3	48	55	5.6
SLB	12298	2014	1	2	8	33	27	1	275	NC304xOh7B	DRIL68.034	67	7.5	7	5.5	3	35	6	5.7
SLB	12299	2014	1	2	8	33	26	1	276	NC304xOh7B	DRIL68.047	67	6.5	6	5	2	47	49	4.8
SLB	12301	2014	1	2	8	33	24	1	278	NC304xOh7B	DRIL68.029	NA	NA	NA	NA	NA	NA	NA	NA
SLB	12302	2014	1	2	8	33	23	1	279	NC304xOh7B	DRIL68.098	71	7	6.5	6	2	41	46	5.4
SLB	12303	2014	1	2	8	33	22	1	280	NC304xOh7B	DRIL68.109	67	8.5	8	8	7.5	42	40	8
SLB	12304	2014	1	2	8	33	21	1	281	NC304xOh7B	DRIL68.064	71	7	7	6	3	4	64	5.8
SLB	12306	2014	1	2	8	33	19	1	283	NC304xOh7B	DRIL68.044	71	6	6	5	2	65	69	4.8
SLB	12307	2014	1	2	8	33	18	1	284	NC304xOh7B	DRIL68.103	71	7	7	5	3.5	60	54	5.5
SLB	12310	2014	1	2	8	33	15	1	287	NC304xOh7B	DRIL68.096	67	7.5	7	6	4	57	39	6.1
SLB	12311	2014	1	2	8	33	14	1	288	NC304xOh7B	DRIL68.010	71	7.5	7	7	6.5	51	40	7
SLB	12313	2014	1	2	9	33	12	1	290	NC304xOh7B	DRIL68.100	71	8.5	8	7	5.5	42	25	7.2
SLB	12315	2014	1	2	9	33	10	1	292	NC304xOh7B	DRIL68.030	71	7.5	6	6	5.5	42	33	6.1
SLB	12316	2014	1	2	9	33	9	1	293	NC304xOh7B	DRIL68.072	70	7	6	5	2	60	45	4.9
SLB	12317	2014	1	2	9	33	8	1	294	NC304xOh7B	DRIL68.038	67	7.5	7	6	3	39	31	5.8
SLB	12318	2014	1	2	9	33	7	1	295	NC304xOh7B	DRIL68.068	67	6.5	7	6	4.5	40	32	6
SLB	12320	2014	1	2	9	33	5	1	297	NC304xOh7B	DRIL68.053	70	6	5	5	3	50	37	4.7
SLB	12322	2014	1	2	9	33	3	1	299	NC304xOh7B	DRIL68.070	66	8	8	6.5	5	42	40	6.8
SLB	12323	2014	1	2	9	33	2	1	300	NC304xOh7B	DRIL68.060	67	7.5	7.5	6.5	5	48	28	6.6
SLB	12326	2014	1	2	9	34	2	1	303	NC304xOh7B	DRIL68.117	67	8	8	7	3	31	20	6.5
SLB	12327	2014	1	2	9	34	3	1	304	NC304xOh7B	DRIL68.084	67	6.5	6	5	2	49	41	4.8
SLB	12328	2014	1	2	9	34	4	1	305	NC304xOh7B	DRIL68.086	67	6	6	5.5	3	55	55	5.2
SLB	12329	2014	1	2	9	34	5	1	306	NC304xOh7B	DRIL68.063	NA	NA	NA	NA	NA	NA	NA	NA
SLB	6809	2015	1	1	1	9	14	1	1	NC304xOh7B	DRIL68.021	71	7.5	6.5	5.5	NA	56	46	6.5
SLB	6810	2015	1	1	1	9	13	1	2	NC304xOh7B	DRIL68.123	71	7.5	6.5	5.5	NA	26	9	6.5
SLB	6812	2015	1	1	1	9	11	1	4	NC304xOh7B	DRIL68.026	73	7.5	7	5.5	NA	47	37	6.8
SLB	6813	2015	1	1	1	9	10	1	5	NC304xOh7B	DRIL68.074	71	9	7	3	NA	63	58	6.5
SLB	6814	2015	1	1	1	9	9	1	6	NC304xOh7B	DRIL68.087	71	8	7	5.5	NA	56	69	6.9
SLB	6815	2015	1	1	1	9	8	1	7	NC304xOh7B	DRIL68.034	73	8	7	5	NA	31	13	6.8
SLB	6816	2015	1	1	1	9	7	1	8	NC304xOh7B	DRIL68.097	73	8.5	7	5	NA	38	17	6.9
SLB	6817	2015	1	1	1	9	6	1	9	NC304xOh7B	DRIL68.041	72	8	7	7	NA	42	28	7.3
SLB	6818	2015	1	1	1	9	5	1	10	NC304xOh7B	DRIL68.036	71	8	7	5.5	NA	60	62	6.9
SLB	6820	2015	1	1	1	9	3	1	12	NC304xOh7B	DRIL68.122	71	8	7	6	NA	47	32	7
SLB	6821	2015	1	1	1	9	2	1	13	NC304xOh7B	DRIL68.126	72	7.5	7	5.5	NA	56	37	6.8
SLB	6823	2015	1	1	1	10	1	1	15	NC304xOh7B	DRIL68.044	73	7.5	6.5	5	NA	56	54	6.4
SLB	6824	2015	1	1	1	10	2	1	16	NC304xOh7B	DRIL68.039	73	8.5	7.5	6.5	NA	51	50	7.5
SLB	6826	2015	1	1	2	10	4	1	18	NC304xOh7B	DRIL68.119	74	8	7.5	5	NA	38	28	7
SLB	6827	2015	1	1	2	10	5	1	19	NC304xOh7B	DRIL68.024	73	7.5	6	3	NA	38	9	5.6
SLB	6828	2015	1	1	2	10	6	1	20	NC304xOh7B	DRIL68.005	70	8	7.5	7	NA	56	58	7.5
SLB	6829	2015	1	1	2	10	7	1	21	NC304xOh7B	DRIL68.076	74	7.5	7.5	5.5	NA	51	50	7
SLB	6830	2015	1	1	2	10	8	1	22	NC304xOh7B	DRIL68.015	75	8	7	5.5	NA	5	41	6.9
SLB	6832	2015	1	1	2	10	10	1	24	NC304xOh7B	DRIL68.016	73	7.5	7	5	NA	47	50	6.6
SLB	6833	2015	1	1	2	10	11	1	25	NC304xOh7B	DRIL68.077	71	8	7	5.5	NA	60	54	6.9
SLB	6835	2015	1	1	2	10	13	1	27	NC304xOh7B	DRIL68.031	73	8.5	7	5	NA	42	37	6.9
SLB	6837	2015	1	1	2	10	15	1	29	NC304xOh7B	DRIL68.070	68	7.5	6.5	5	NA	38	37	6.4
SLB	6838	2015	1	1	2	10	16	1	30	NC304xOh7B	DRIL68.027	69	8	6.5	5.5	NA	47	32	6.6
SLB	6840	2015	1	1	2	10	18	1	32	NC304xOh7B	DRIL68.003	75	7.5	6.5	5	NA	42	17	6.4
SLB	6841	2015	1	1	2	10	19	1	33	NC304xOh7B	DRIL68.071	72	8.5	8	6.5	NA	63	54	7.8
SLB	6842	2015	1	1	2	10	20	1	34	NC304xOh7B	DRIL68.106	72	7.5	7	5	NA	42	28	6.6
SLB	6843	2015	1	1	3	10	21	1	35	NC304xOh7B	DRIL68.103	72	7.5	6.5	5	NA	47	50	6.4
SLB	6845	2015	1	1	3	10	23	1	37	NC304xOh7B	DRIL68.033	75	8.5	7.5	6	NA	56	50	7.4
SLB	6846	2015	1	1	3	10	24	1	38	NC304xOh7B	DRIL68.095	67	7.5	7	5.5	NA	38	54	6.8
SLB	6849	2015	1	1	3	10	27	1	41	NC304xOh7B	DRIL68.105	71	7.5	6.5	5	NA	38	9	6.4
SLB	6853	2015	1	1	3	11	26	1	45	NC304xOh7B	DRIL68.063	NA	NA	NA	NA	NA	NA	NA	NA
SLB	6854	2015	1	1	3	11	25	1	46	NC304xOh7B	DRIL68.047	68	7.5	6.5	4	NA	56	54	6.1
SLB	6858	2015	1	1	3	11	21	1	50	NC304xOh7B	DRIL68.032	67	7.5	6.5	5	NA	51	50	6.4
SLB	6862	2015	1	1	4	11	17	1	54	NC304xOh7B	DRIL68.038	74	8	7.5	6	NA	60	41	7.3
SLB	6864	2015	1	1	4	11	15	1	56	NC304xOh7B	DRIL68.051	71	7.5	7.5	6.5	NA	42	41	7.3
SLB	6865	2015	1	1	4	11	14	1	57	NC304xOh7B	DRIL68.101	72	8.5	7.5	6	NA	42	28	7.4
SLB	6866	2015	1	1	4	11	13	1	58	NC304xOh7B	DRIL68.056	68	8	7.5	5	NA	42	32	7
SLB	6868	2015	1	1	4	11	11	1	60	NC304xOh7B	DRIL68.019	71	8	7.5	6.5	NA	38	54	7.4
SLB	6869	2015	1	1	4	11	10	1	61	NC304xOh7B	DRIL68.054	68	7.5	7	5.5	NA	63	50	6.8
SLB	6870	2015	1	1	4	11	9	1	62	NC304xOh7B	DRIL68.012	68	7.5	6.5	5.5	NA	47	65	6.5
SLB	6871	2015	1	1	4	11	8	1	63	NC304xOh7B	DRIL68.112	73	8	7.5	6	NA	35	32	7.3
SLB	6874	2015	1	1	4	11	5	1	66	NC304xOh7B	DRIL68.002	68	7.5	6.5	4	NA	42	21	6.1
SLB	6877	2015	1	1	5	11	2	1	69	NC304xOh7B	DRIL68.007	72	7.5	6.5	5	NA	51	41	6.4
SLB	6878	2015	1	1	5	11	1	1	70	NC304xOh7B	DRIL68.043	71	7.5	7	5.5	NA	47	46	6.8
SLB	6880	2015	1	1	5	12	2	1	72	NC304xOh7B	DRIL68.072	73	7.5	6.5	5	NA	56	46	6.4
SLB	6881	2015	1	1	5	12	3	1	73	NC304xOh7B	DRIL68.083	73	7.5	6.5	5	NA	56	50	6.4
SLB	6883	2015	1	1	5	12	5	1	75	NC304xOh7B	DRIL68.104	73	7.5	6	2	NA	38	32	5.4
SLB	6884	2015	1	1	5	12	6	1	76	NC304xOh7B	DRIL68.073	71	8	7.5	5.5	NA	38	32	7.1
SLB	6885	2015	1	1	5	12	7	1	77	NC304xOh7B	DRIL68.081	71	7.5	7	5	NA	42	50	6.6
SLB	6886	2015	1	1	5	12	8	1	78	NC304xOh7B	DRIL68.010	75	8	7.5	7	NA	51	28	7.5
SLB	6888	2015	1	1	5	12	10	1	80	NC304xOh7B	DRIL68.084	71	7	6	4	NA	51	54	5.8
SLB	6889	2015	1	1	5	12	11	1	81	NC304xOh7B	DRIL68.006	71	7.5	7.5	6	NA	35	46	7.1
SLB	6890	2015	1	1	5	12	12	1	82	NC304xOh7B	DRIL68.061	71	7.5	7.5	6	NA	47	50	7.1
SLB	6892	2015	1	1	5	12	14	1	84	NC304xOh7B	DRIL68.115	71	7.5	6.5	4.5	NA	47	25	6.3
SLB	6893	2015	1	1	5	12	15	1	85	NC304xOh7B	DRIL68.018	71	8	7.5	6	NA	31	46	7.3
SLB	6895	2015	1	1	6	12	17	1	87	NC304xOh7B	DRIL68.022	73	7.5	7.5	5	NA	60	46	6.9
SLB	6896	2015	1	1	6	12	18	1	88	NC304xOh7B	DRIL68.060	72	7.5	7	5.5	NA	38	32	6.8
SLB	6897	2015	1	1	6	12	19	1	89	NC304xOh7B	DRIL68.046	70	8	7	5	NA	60	50	6.8
SLB	6899	2015	1	1	6	12	21	1	91	NC304xOh7B	DRIL68.117	69	8	7.5	6	NA	29	13	7.3
SLB	6900	2015	1	1	6	12	22	1	92	NC304xOh7B	DRIL68.118	71	8	7	6	NA	35	37	7
SLB	6902	2015	1	1	6	12	24	1	94	NC304xOh7B	DRIL68.102	74	7	6.5	5	NA	38	17	6.3
SLB	6903	2015	1	1	6	12	25	1	95	NC304xOh7B	DRIL68.082	69	7.5	6.5	5	NA	51	50	6.4
SLB	6905	2015	1	1	6	12	27	1	97	NC304xOh7B	DRIL68.055	69	8	7.5	6.5	NA	51	58	7.4
SLB	6906	2015	1	1	6	12	28	1	98	NC304xOh7B	DRIL68.029	68	7.5	6.5	5	NA	35	32	6.4
SLB	6907	2015	1	1	6	13	28	1	99	NC304xOh7B	DRIL68.114	71	7.5	7.5	6	NA	35	37	7.1
SLB	6908	2015	1	1	6	13	27	1	100	NC304xOh7B	DRIL68.089	69	7.5	7	5.5	NA	51	62	6.8
SLB	6909	2015	1	1	6	13	26	1	101	NC304xOh7B	DRIL68.091	68	7.5	6.5	5	NA	3	62	6.4
SLB	6910	2015	1	1	6	13	25	1	102	NC304xOh7B	DRIL68.025	71	8	7.5	6	NA	51	50	7.3
SLB	6911	2015	1	1	7	13	24	1	103	NC304xOh7B	DRIL68.092	71	8.5	7.5	6.5	NA	42	54	7.5
SLB	6913	2015	1	1	7	13	22	1	105	NC304xOh7B	DRIL68.067	71	8.5	8	7.5	NA	5	73	8
SLB	6914	2015	1	1	7	13	21	1	106	NC304xOh7B	DRIL68.069	71	8	7.5	5	NA	47	50	7
SLB	6915	2015	1	1	7	13	20	1	107	NC304xOh7B	DRIL68.090	72	7.5	7.5	5.5	NA	63	58	7
SLB	6916	2015	1	1	7	13	19	1	108	NC304xOh7B	DRIL68.048	72	7.5	7.5	6	NA	42	37	7.1
SLB	6917	2015	1	1	7	13	18	1	109	NC304xOh7B	DRIL68.094	71	7.5	7	5	NA	5	50	6.6
SLB	6919	2015	1	1	7	13	16	1	111	NC304xOh7B	DRIL68.085	69	7.5	6.5	5.5	NA	38	37	6.5
SLB	6920	2015	1	1	7	13	15	1	112	NC304xOh7B	DRIL68.042	71	8	7	6	NA	56	41	7
SLB	6922	2015	1	1	7	13	13	1	114	NC304xOh7B	DRIL68.028	71	7.5	7.5	5.5	NA	51	50	7
SLB	6923	2015	1	1	7	13	12	1	115	NC304xOh7B	DRIL68.127	71	8	7.5	6.5	NA	56	50	7.4
SLB	6924	2015	1	1	7	13	11	1	116	NC304xOh7B	DRIL68.053	73	7.5	7	5.5	NA	56	54	6.8
SLB	6925	2015	1	1	7	13	10	1	117	NC304xOh7B	DRIL68.075	68	7	6.5	3	NA	35	54	5.8
SLB	6926	2015	1	1	7	13	9	1	118	NC304xOh7B	DRIL68.078	71	8	6.5	4	NA	51	65	6.3
SLB	6927	2015	1	1	7	13	8	1	119	NC304xOh7B	DRIL68.088	75	8.5	7.5	6	NA	56	32	7.4
SLB	6928	2015	1	1	8	13	7	1	120	NC304xOh7B	DRIL68.037	73	7.5	7	4	NA	60	37	6.4
SLB	6929	2015	1	1	8	13	6	1	121	NC304xOh7B	DRIL68.040	74	8.5	7.5	7	NA	29	37	7.6
SLB	6930	2015	1	1	8	13	5	1	122	NC304xOh7B	DRIL68.100	73	8.5	7	5	NA	31	25	6.9
SLB	6934	2015	1	1	8	13	1	1	126	NC304xOh7B	DRIL68.099	73	7.5	6.5	5	NA	51	46	6.4
SLB	6936	2015	1	1	8	14	2	1	128	NC304xOh7B	DRIL68.023	71	8	7	6	NA	56	46	7
SLB	6937	2015	1	1	8	14	3	1	129	NC304xOh7B	DRIL68.098	74	7	6	5	NA	35	37	6
SLB	6939	2015	1	1	8	14	5	1	131	NC304xOh7B	DRIL68.125	72	7.5	6	4	NA	26	21	5.9
SLB	6940	2015	1	1	8	14	6	1	132	NC304xOh7B	DRIL68.121	71	8	7	5.5	NA	51	46	6.9
SLB	6941	2015	1	1	8	14	7	1	133	NC304xOh7B	DRIL68.080	70	8	7	5	NA	51	54	6.8
SLB	6942	2015	1	1	8	14	8	1	134	NC304xOh7B	DRIL68.062	NA	NA	NA	NA	NA	NA	NA	NA
SLB	6943	2015	1	1	8	14	9	1	135	NC304xOh7B	DRIL68.008	70	8	7	4	NA	51	54	6.5
SLB	6944	2015	1	1	8	14	10	1	136	NC304xOh7B	DRIL68.030	73	8	7	6	NA	47	46	7
SLB	6945	2015	1	1	9	14	11	1	137	NC304xOh7B	DRIL68.116	72	7	6.5	5.5	NA	56	50	6.4
SLB	6946	2015	1	1	9	14	12	1	138	NC304xOh7B	DRIL68.052	68	7.5	6.5	5	NA	56	65	6.4
SLB	6948	2015	1	1	9	14	14	1	140	NC304xOh7B	DRIL68.064	68	8	7.5	5.5	NA	60	69	7.1
SLB	6949	2015	1	1	9	14	15	1	141	NC304xOh7B	DRIL68.014	68	8	7	5.5	NA	47	37	6.9
SLB	6950	2015	1	1	9	14	16	1	142	NC304xOh7B	DRIL68.086	74	8	7.5	5.5	NA	3	54	7.1
SLB	6951	2015	1	1	9	14	17	1	143	NC304xOh7B	DRIL68.049	74	7.5	7.5	5	NA	60	54	6.9
SLB	6952	2015	1	1	9	14	18	1	144	NC304xOh7B	DRIL68.109	68	8	7.5	7	NA	29	32	7.5
SLB	6953	2015	1	1	9	14	19	1	145	NC304xOh7B	DRIL68.035	75	7.5	7	5.5	NA	56	41	6.8
SLB	6955	2015	1	1	9	14	21	1	147	NC304xOh7B	DRIL68.111	72	8	6.5	2	NA	38	37	5.8
SLB	6956	2015	1	1	9	14	22	1	148	NC304xOh7B	DRIL68.096	72	7.5	6.5	5	NA	31	6	6.4
SLB	6958	2015	1	1	9	14	24	1	150	NC304xOh7B	DRIL68.068	71	8	7.5	6	NA	60	58	7.3
SLB	6959	2015	1	1	9	14	25	1	151	NC304xOh7B	DRIL68.004	67	7.5	7	5.5	NA	38	62	6.8
SLB	6960	2015	1	1	9	14	26	1	152	NC304xOh7B	DRIL68.017	72	7.5	7.5	5.5	NA	56	50	7
SLB	6961	2015	1	1	9	14	27	1	153	NC304xOh7B	DRIL68.108	72	8	7.5	6	NA	51	32	7.3
SLB	12807	2015	1	2	1	15	5	1	154	NC304xOh7B	DRIL68.101	68	7.5	6.5	4	NA	51	50	6
SLB	12808	2015	1	2	1	15	4	1	155	NC304xOh7B	DRIL68.111	NA	NA	NA	NA	NA	NA	NA	NA
SLB	12810	2015	1	2	1	15	2	1	157	NC304xOh7B	DRIL68.086	74	8	7	5	NA	38	28	6.7
SLB	12813	2015	1	2	1	16	2	1	160	NC304xOh7B	DRIL68.030	NA	NA	NA	NA	NA	NA	NA	NA
SLB	12814	2015	1	2	1	16	3	1	161	NC304xOh7B	DRIL68.043	71	7.5	6	4	NA	38	32	5.8
SLB	12815	2015	1	2	1	16	4	1	162	NC304xOh7B	DRIL68.052	NA	NA	NA	NA	NA	NA	NA	NA
SLB	12816	2015	1	2	1	16	5	1	163	NC304xOh7B	DRIL68.034	67	7.5	6	2	NA	26	6	5.2
SLB	12818	2015	1	2	1	16	7	1	165	NC304xOh7B	DRIL68.064	66	7.5	6	4	NA	51	67	5.8
SLB	12820	2015	1	2	1	16	9	1	167	NC304xOh7B	DRIL68.068	71	7.5	7	5.5	NA	60	54	6.7
SLB	12821	2015	1	2	1	16	10	1	168	NC304xOh7B	DRIL68.069	67	7.5	6.5	4	NA	47	46	6
SLB	12822	2015	1	2	1	16	11	1	169	NC304xOh7B	DRIL68.084	68	7.5	6.5	4	NA	56	37	6
SLB	12823	2015	1	2	1	16	12	1	170	NC304xOh7B	DRIL68.063	NA	NA	NA	NA	NA	NA	NA	NA
SLB	12824	2015	1	2	2	16	13	1	171	NC304xOh7B	DRIL68.077	68	8	7	5	NA	31	50	6.7
SLB	12825	2015	1	2	2	16	14	1	172	NC304xOh7B	DRIL68.010	74	8	7.5	5.5	NA	56	41	7.1
SLB	12826	2015	1	2	2	16	15	1	173	NC304xOh7B	DRIL68.109	70	8.5	8.5	7.5	NA	31	32	8.2
SLB	12827	2015	1	2	2	16	16	1	174	NC304xOh7B	DRIL68.100	74	8	8	6	NA	42	37	7.4
SLB	12830	2015	1	2	2	16	19	1	177	NC304xOh7B	DRIL68.044	70	7	6.5	4	NA	3	58	5.9
SLB	12832	2015	1	2	2	16	21	1	179	NC304xOh7B	DRIL68.003	71	7.5	6	4.5	NA	47	50	5.9
SLB	12833	2015	1	2	2	16	22	1	180	NC304xOh7B	DRIL68.074	70	9	8.5	7	NA	47	62	8.2
SLB	12836	2015	1	2	2	16	25	1	183	NC304xOh7B	DRIL68.096	65	7.5	6	4.5	NA	35	9	5.9
SLB	12837	2015	1	2	2	16	26	1	184	NC304xOh7B	DRIL68.035	71	7.5	6	4	NA	47	37	5.8
SLB	12838	2015	1	2	2	16	27	1	185	NC304xOh7B	DRIL68.060	71	7.5	7	5	NA	56	41	6.6
SLB	12840	2015	1	2	2	17	28	1	187	NC304xOh7B	DRIL68.019	68	7.5	6.5	4.5	NA	47	54	6.2
SLB	12841	2015	1	2	3	17	27	1	188	NC304xOh7B	DRIL68.048	67	7	6	3	NA	42	46	5.4
SLB	12842	2015	1	2	3	17	26	1	189	NC304xOh7B	DRIL68.116	70	7.5	6	3	NA	47	46	5.5
SLB	12843	2015	1	2	3	17	25	1	190	NC304xOh7B	DRIL68.119	68	8	7	5	NA	47	50	6.7
SLB	12845	2015	1	2	3	17	23	1	192	NC304xOh7B	DRIL68.122	71	8.5	8.5	7	NA	38	25	8.1
SLB	12846	2015	1	2	3	17	22	1	193	NC304xOh7B	DRIL68.115	68	6	5	2	NA	51	41	4.4
SLB	12847	2015	1	2	3	17	21	1	194	NC304xOh7B	DRIL68.103	NA	NA	NA	NA	NA	NA	NA	NA
SLB	12848	2015	1	2	3	17	20	1	195	NC304xOh7B	DRIL68.062	72	8	7.5	5	NA	56	37	6.9
SLB	12850	2015	1	2	3	17	18	1	197	NC304xOh7B	DRIL68.049	NA	NA	NA	NA	NA	NA	NA	NA
SLB	12851	2015	1	2	3	17	17	1	198	NC304xOh7B	DRIL68.026	71	7.5	6.5	3.5	NA	42	28	5.9
SLB	12852	2015	1	2	3	17	16	1	199	NC304xOh7B	DRIL68.082	71	7.5	6.5	4	NA	35	46	6
SLB	12853	2015	1	2	3	17	15	1	200	NC304xOh7B	DRIL68.040	71	8.5	7.5	6.5	NA	38	50	7.4
SLB	12856	2015	1	2	3	17	12	1	203	NC304xOh7B	DRIL68.015	74	8	7.5	5.5	NA	47	41	7.1
SLB	12857	2015	1	2	3	17	11	1	204	NC304xOh7B	DRIL68.088	72	8.5	7.5	5.5	NA	60	25	7.2
SLB	12858	2015	1	2	4	17	10	1	205	NC304xOh7B	DRIL68.091	68	8	6.5	4.5	NA	51	50	6.3
SLB	12861	2015	1	2	4	17	7	1	208	NC304xOh7B	DRIL68.002	67	8	7	5	NA	63	37	6.7
SLB	12862	2015	1	2	4	17	6	1	209	NC304xOh7B	DRIL68.022	71	8	7	5	NA	56	54	6.7
SLB	12863	2015	1	2	4	17	5	1	210	NC304xOh7B	DRIL68.075	67	7.5	6.5	4	NA	47	46	6
SLB	12864	2015	1	2	4	17	4	1	211	NC304xOh7B	DRIL68.081	72	7.5	6.5	5.5	NA	47	58	6.4
SLB	12865	2015	1	2	4	17	3	1	212	NC304xOh7B	DRIL68.053	72	7.5	7	5	NA	38	25	6.6
SLB	12866	2015	1	2	4	17	2	1	213	NC304xOh7B	DRIL68.031	71	8	7	5	NA	38	32	6.7
SLB	12867	2015	1	2	4	17	1	1	214	NC304xOh7B	DRIL68.123	NA	NA	NA	NA	NA	NA	NA	NA
SLB	12870	2015	1	2	4	18	3	1	217	NC304xOh7B	DRIL68.061	71	8	7.5	5	NA	47	32	6.9
SLB	12871	2015	1	2	4	18	4	1	218	NC304xOh7B	DRIL68.097	71	8	7	4	NA	31	13	6.4
SLB	12872	2015	1	2	4	18	5	1	219	NC304xOh7B	DRIL68.104	71	7	6	4	NA	35	32	5.7
SLB	12873	2015	1	2	4	18	6	1	220	NC304xOh7B	DRIL68.007	68	7.5	6.5	4	NA	42	41	6
SLB	12874	2015	1	2	4	18	7	1	221	NC304xOh7B	DRIL68.032	68	7.5	7	4	NA	60	62	6.3
SLB	12875	2015	1	2	5	18	8	1	222	NC304xOh7B	DRIL68.072	71	8	7	5	NA	56	58	6.7
SLB	12876	2015	1	2	5	18	9	1	223	NC304xOh7B	DRIL68.006	68	8	7	5	NA	56	41	6.7
SLB	12877	2015	1	2	5	18	10	1	224	NC304xOh7B	DRIL68.008	71	8	7.5	6	NA	51	50	7.2
SLB	12878	2015	1	2	5	18	11	1	225	NC304xOh7B	DRIL68.025	71	8.5	7.5	6	NA	56	37	7.3
SLB	12879	2015	1	2	5	18	12	1	226	NC304xOh7B	DRIL68.038	67	8	7.5	6	NA	60	46	7.2
SLB	12880	2015	1	2	5	18	13	1	227	NC304xOh7B	DRIL68.102	74	7.5	6.5	4	NA	29	25	6
SLB	12882	2015	1	2	5	18	15	1	229	NC304xOh7B	DRIL68.125	NA	NA	NA	NA	NA	NA	NA	NA
SLB	12883	2015	1	2	5	18	16	1	230	NC304xOh7B	DRIL68.033	72	8	7	5	NA	56	41	6.7
SLB	12886	2015	1	2	5	18	19	1	233	NC304xOh7B	DRIL68.099	71	7.5	6	4	NA	47	28	5.8
SLB	12887	2015	1	2	5	18	20	1	234	NC304xOh7B	DRIL68.039	NA	NA	NA	NA	NA	NA	NA	NA
SLB	12888	2015	1	2	5	18	21	1	235	NC304xOh7B	DRIL68.118	68	8	7	5	NA	26	21	6.7
SLB	12889	2015	1	2	5	18	22	1	236	NC304xOh7B	DRIL68.095	67	7.5	7	5	NA	47	62	6.6
SLB	12890	2015	1	2	5	18	23	1	237	NC304xOh7B	DRIL68.076	71	7.5	7	5	NA	47	50	6.6
SLB	12891	2015	1	2	5	18	24	1	238	NC304xOh7B	DRIL68.126	71	7.5	7	5	NA	51	37	6.6
SLB	12892	2015	1	2	6	18	25	1	239	NC304xOh7B	DRIL68.106	68	7.5	6.5	3	NA	47	28	5.8
SLB	12894	2015	1	2	6	18	27	1	241	NC304xOh7B	DRIL68.071	68	9	8.5	7.5	NA	51	50	8.3
SLB	12895	2015	1	2	6	18	28	1	242	NC304xOh7B	DRIL68.054	67	8	6.5	4.5	NA	51	50	6.3
SLB	12898	2015	1	2	6	19	26	1	245	NC304xOh7B	DRIL68.087	68	7.5	7	5	NA	60	65	6.6
SLB	12900	2015	1	2	6	19	24	1	247	NC304xOh7B	DRIL68.016	72	7.5	7	5.5	NA	56	58	6.7
SLB	12901	2015	1	2	6	19	23	1	248	NC304xOh7B	DRIL68.018	68	8	7.5	5.5	NA	47	41	7.1
SLB	12902	2015	1	2	6	19	22	1	249	NC304xOh7B	DRIL68.085	NA	NA	NA	NA	NA	NA	NA	NA
SLB	12903	2015	1	2	6	19	21	1	250	NC304xOh7B	DRIL68.021	NA	NA	NA	NA	NA	NA	NA	NA
SLB	12904	2015	1	2	6	19	20	1	251	NC304xOh7B	DRIL68.005	NA	NA	NA	NA	NA	NA	NA	NA
SLB	12905	2015	1	2	6	19	19	1	252	NC304xOh7B	DRIL68.037	68	7.5	6.5	3	NA	56	50	5.8
SLB	12906	2015	1	2	6	19	18	1	253	NC304xOh7B	DRIL68.014	67	7.5	6.5	4	NA	47	37	6
SLB	12907	2015	1	2	6	19	17	1	254	NC304xOh7B	DRIL68.046	67	7.5	6.5	5	NA	56	50	6.3
SLB	12908	2015	1	2	6	19	16	1	255	NC304xOh7B	DRIL68.117	72	7.5	6.5	6	NA	42	9	6.6
SLB	12909	2015	1	2	7	19	15	1	256	NC304xOh7B	DRIL68.112	71	7.5	7	5	NA	38	46	6.6
SLB	12910	2015	1	2	7	19	14	1	257	NC304xOh7B	DRIL68.090	71	7.5	7	4.5	NA	60	58	6.4
SLB	12912	2015	1	2	7	19	12	1	259	NC304xOh7B	DRIL68.041	71	8.5	8	7	NA	38	28	7.8
SLB	12914	2015	1	2	7	19	10	1	261	NC304xOh7B	DRIL68.024	NA	NA	NA	NA	NA	NA	NA	NA
SLB	12915	2015	1	2	7	19	9	1	262	NC304xOh7B	DRIL68.056	NA	NA	NA	NA	NA	NA	NA	NA
SLB	12917	2015	1	2	7	19	7	1	264	NC304xOh7B	DRIL68.127	69	8	8	7	NA	51	50	7.7
SLB	12920	2015	1	2	7	19	4	1	267	NC304xOh7B	DRIL68.028	71	7.5	7	5	NA	51	62	6.6
SLB	12921	2015	1	2	7	19	3	1	268	NC304xOh7B	DRIL68.094	74	7.5	6.5	5	NA	47	28	6.3
SLB	12922	2015	1	2	7	19	2	1	269	NC304xOh7B	DRIL68.080	71	7.5	7	5	NA	56	54	6.6
SLB	12923	2015	1	2	7	19	1	1	270	NC304xOh7B	DRIL68.017	NA	NA	NA	NA	NA	NA	NA	NA
SLB	12924	2015	1	2	7	20	1	1	271	NC304xOh7B	DRIL68.073	72	7.5	6.5	5	NA	42	37	6.3
SLB	12925	2015	1	2	7	20	2	1	272	NC304xOh7B	DRIL68.055	71	8.5	7.5	7	NA	47	46	7.6
SLB	12926	2015	1	2	8	20	3	1	273	NC304xOh7B	DRIL68.092	72	8.5	8	7	NA	35	32	7.8
SLB	12927	2015	1	2	8	20	4	1	274	NC304xOh7B	DRIL68.078	71	7.5	7	5	NA	42	54	6.6
SLB	12928	2015	1	2	8	20	5	1	275	NC304xOh7B	DRIL68.089	69	8	7.5	6	NA	51	62	7.2
SLB	12929	2015	1	2	8	20	6	1	276	NC304xOh7B	DRIL68.067	71	8.5	8	7	NA	3	54	7.8
SLB	12930	2015	1	2	8	20	7	1	277	NC304xOh7B	DRIL68.042	69	7.5	7	5	NA	35	41	6.6
SLB	12931	2015	1	2	8	20	8	1	278	NC304xOh7B	DRIL68.047	NA	NA	NA	NA	NA	NA	NA	NA
SLB	12936	2015	1	2	8	20	13	1	283	NC304xOh7B	DRIL68.023	71	7.5	7	5	NA	42	37	6.6
SLB	12938	2015	1	2	8	20	15	1	285	NC304xOh7B	DRIL68.108	75	8	7.5	5	NA	42	17	6.9
SLB	12939	2015	1	2	8	20	16	1	286	NC304xOh7B	DRIL68.027	71	8.5	8	6	NA	47	41	7.6
SLB	12940	2015	1	2	8	20	17	1	287	NC304xOh7B	DRIL68.012	NA	NA	NA	NA	NA	NA	NA	NA
SLB	12941	2015	1	2	8	20	18	1	288	NC304xOh7B	DRIL68.029	NA	NA	NA	NA	NA	NA	NA	NA
SLB	12943	2015	1	2	9	20	20	1	290	NC304xOh7B	DRIL68.105	68	7	6	4	NA	51	28	5.7
SLB	12944	2015	1	2	9	20	21	1	291	NC304xOh7B	DRIL68.114	68	7.5	6.5	4	NA	42	50	6
SLB	12945	2015	1	2	9	20	22	1	292	NC304xOh7B	DRIL68.121	68	7.5	6.5	5	NA	56	54	6.3
SLB	12947	2015	1	2	9	20	24	1	294	NC304xOh7B	DRIL68.004	68	7.5	7	5	NA	47	58	6.6
SLB	12950	2015	1	2	9	20	27	1	297	NC304xOh7B	DRIL68.036	67	7.5	6.5	4.5	NA	42	50	6.2
SLB	12951	2015	1	2	9	20	28	1	298	NC304xOh7B	DRIL68.070	65	8	7	5	NA	51	46	6.7
SLB	12952	2015	1	2	9	21	28	1	299	NC304xOh7B	DRIL68.051	68	8	7.5	6	NA	63	67	7.2
SLB	12954	2015	1	2	9	21	26	1	301	NC304xOh7B	DRIL68.098	71	7.5	6.5	4	NA	47	50	6
SLB	12957	2015	1	2	9	21	23	1	304	NC304xOh7B	DRIL68.083	NA	NA	NA	NA	NA	NA	NA	NA

## Sheet: NLB
trait	plot_nrsry	year	location	rep	block	range	row	field_block	plot_xprmnt	pedigree	entry	dta	sc1	sc2	sc3	sc4	eh	ph	audpc
NLB	16301	2014	1	1	1	41	27	1	1	NC304xOh7B	DRIL68.106	76	5	15	35	75	31	25	33.1
NLB	16302	2014	1	1	1	41	26	1	2	NC304xOh7B	DRIL68.041	76	15	30	40	80	29	1	41.8
NLB	16303	2014	1	1	1	41	25	1	3	NC304xOh7B	DRIL68.080	76	20	30	40	80	18	16	42.5
NLB	16305	2014	1	1	1	41	23	1	5	NC304xOh7B	DRIL68.047	NA	NA	NA	NA	NA	NA	NA	NA
NLB	16308	2014	1	1	1	41	20	1	8	NC304xOh7B	DRIL68.101	77	10	10	20	55	NA	77	22.9
NLB	16310	2014	1	1	1	41	18	1	10	NC304xOh7B	DRIL68.119	77	15	20	35	60	26	9	32.9
NLB	16311	2014	1	1	1	41	17	1	11	NC304xOh7B	DRIL68.063	77	5	15	30	60	25	6	28.2
NLB	16312	2014	1	1	1	41	16	1	12	NC304xOh7B	DRIL68.007	77	5	15	20	60	29	17	24.7
NLB	16314	2014	1	1	1	41	14	1	14	NC304xOh7B	DRIL68.032	NA	NA	NA	NA	NA	NA	NA	NA
NLB	16315	2014	1	1	1	41	13	1	15	NC304xOh7B	DRIL68.123	NA	NA	NA	NA	NA	NA	NA	NA
NLB	16317	2014	1	1	1	41	11	1	17	NC304xOh7B	DRIL68.097	NA	NA	NA	NA	NA	NA	NA	NA
NLB	16318	2014	1	1	2	41	10	1	18	NC304xOh7B	DRIL68.068	NA	NA	NA	NA	NA	NA	NA	NA
NLB	16319	2014	1	1	2	41	9	1	19	NC304xOh7B	DRIL68.117	76	15	15	20	65	18	97	27.2
NLB	16320	2014	1	1	2	41	8	1	20	NC304xOh7B	DRIL68.090	77	25	35	45	70	25	13	44.4
NLB	16321	2014	1	1	2	41	7	1	21	NC304xOh7B	DRIL68.040	77	15	20	30	60	24	9	31.1
NLB	16322	2014	1	1	2	41	6	1	22	NC304xOh7B	DRIL68.037	NA	NA	NA	NA	NA	NA	NA	NA
NLB	16324	2014	1	1	2	41	4	1	24	NC304xOh7B	DRIL68.083	77	25	30	40	60	11	9	39.1
NLB	16325	2014	1	1	2	41	3	1	25	NC304xOh7B	DRIL68.104	NA	NA	NA	NA	NA	NA	NA	NA
NLB	16327	2014	1	1	2	41	1	1	27	NC304xOh7B	DRIL68.018	77	30	40	55	100	NA	101	56.4
NLB	16328	2014	1	1	2	42	1	1	28	NC304xOh7B	DRIL68.031	77	20	25	35	70	25	2	37.2
NLB	16330	2014	1	1	2	42	3	1	30	NC304xOh7B	DRIL68.067	77	20	20	35	65	29	27	34.7
NLB	16331	2014	1	1	2	42	4	1	31	NC304xOh7B	DRIL68.073	77	10	20	30	65	20	9	31.5
NLB	16332	2014	1	1	2	42	5	1	32	NC304xOh7B	DRIL68.112	NA	NA	NA	NA	NA	NA	NA	NA
NLB	16333	2014	1	1	2	42	6	1	33	NC304xOh7B	DRIL68.118	NA	NA	NA	NA	NA	NA	NA	NA
NLB	16336	2014	1	1	3	42	9	1	36	NC304xOh7B	DRIL68.091	NA	NA	NA	NA	NA	NA	NA	NA
NLB	16337	2014	1	1	3	42	10	1	37	NC304xOh7B	DRIL68.022	NA	NA	NA	NA	NA	NA	NA	NA
NLB	16339	2014	1	1	3	42	12	1	39	NC304xOh7B	DRIL68.035	NA	NA	NA	NA	NA	NA	NA	NA
NLB	16340	2014	1	1	3	42	13	1	40	NC304xOh7B	DRIL68.008	NA	NA	NA	NA	NA	NA	NA	NA
NLB	16341	2014	1	1	3	42	14	1	41	NC304xOh7B	DRIL68.089	76	25	30	40	80	NA	86	43.2
NLB	16342	2014	1	1	3	42	15	1	42	NC304xOh7B	DRIL68.055	76	20	30	30	65	26	6	35.8
NLB	16345	2014	1	1	3	42	18	1	45	NC304xOh7B	DRIL68.038	NA	NA	NA	NA	NA	NA	NA	NA
NLB	16346	2014	1	1	3	42	19	1	46	NC304xOh7B	DRIL68.082	NA	NA	NA	NA	NA	NA	NA	NA
NLB	16347	2014	1	1	3	42	20	1	47	NC304xOh7B	DRIL68.034	NA	NA	NA	NA	NA	NA	NA	NA
NLB	16349	2014	1	1	3	42	22	1	49	NC304xOh7B	DRIL68.086	NA	NA	NA	NA	NA	NA	NA	NA
NLB	16350	2014	1	1	3	42	23	1	50	NC304xOh7B	DRIL68.115	76	25	25	55	95	19	11	50.2
NLB	16351	2014	1	1	3	42	24	1	51	NC304xOh7B	DRIL68.017	77	20	25	50	90	30	17	46.7
NLB	16352	2014	1	1	4	42	25	1	52	NC304xOh7B	DRIL68.122	76	20	30	50	90	26	3	48.1
NLB	16353	2014	1	1	4	42	26	1	53	NC304xOh7B	DRIL68.088	75	25	35	40	85	40	32	45.7
NLB	16354	2014	1	1	4	42	27	1	54	NC304xOh7B	DRIL68.010	76	25	35	45	85	33	37	47.5
NLB	16355	2014	1	1	4	42	28	1	55	NC304xOh7B	DRIL68.077	71	25	35	55	100	29	30	54.2
NLB	16357	2014	1	1	4	43	27	1	57	NC304xOh7B	DRIL68.016	76	25	35	50	90	29	41	50.3
NLB	16359	2014	1	1	4	43	25	1	59	NC304xOh7B	DRIL68.043	71	30	45	55	95	31	13	56.8
NLB	16360	2014	1	1	4	43	24	1	60	NC304xOh7B	DRIL68.030	76	35	40	50	95	35	32	54.3
NLB	16361	2014	1	1	4	43	23	1	61	NC304xOh7B	DRIL68.085	76	20	20	35	65	16	100	34.7
NLB	16362	2014	1	1	4	43	22	1	62	NC304xOh7B	DRIL68.060	76	20	25	45	65	24	16	39.7
NLB	16363	2014	1	1	4	43	21	1	63	NC304xOh7B	DRIL68.100	76	25	25	45	65	25	9	40.4
NLB	16365	2014	1	1	4	43	19	1	65	NC304xOh7B	DRIL68.005	76	20	20	30	65	26	21	32.9
NLB	16366	2014	1	1	4	43	18	1	66	NC304xOh7B	DRIL68.109	NA	NA	NA	NA	NA	NA	NA	NA
NLB	16367	2014	1	1	4	43	17	1	67	NC304xOh7B	DRIL68.084	NA	NA	NA	NA	NA	NA	NA	NA
NLB	16368	2014	1	1	4	43	16	1	68	NC304xOh7B	DRIL68.114	76	20	20	25	55	18	9	29.1
NLB	16371	2014	1	1	5	43	13	1	71	NC304xOh7B	DRIL68.046	76	25	25	40	70	NA	101	39.7
NLB	16372	2014	1	1	5	43	12	1	72	NC304xOh7B	DRIL68.069	76	20	20	35	85	17	101	38.9
NLB	16373	2014	1	1	5	43	11	1	73	NC304xOh7B	DRIL68.023	NA	NA	NA	NA	NA	NA	NA	NA
NLB	16374	2014	1	1	5	43	10	1	74	NC304xOh7B	DRIL68.026	NA	NA	NA	NA	NA	NA	NA	NA
NLB	16376	2014	1	1	5	43	8	1	76	NC304xOh7B	DRIL68.074	76	20	20	35	65	24	6	34.7
NLB	16377	2014	1	1	5	43	7	1	77	NC304xOh7B	DRIL68.051	NA	NA	NA	NA	NA	NA	NA	NA
NLB	16378	2014	1	1	5	43	6	1	78	NC304xOh7B	DRIL68.015	NA	NA	NA	NA	NA	NA	NA	NA
NLB	16379	2014	1	1	5	43	5	1	79	NC304xOh7B	DRIL68.078	NA	NA	NA	NA	NA	NA	NA	NA
NLB	16380	2014	1	1	5	43	4	1	80	NC304xOh7B	DRIL68.027	76	25	35	45	75	29	13	45.4
NLB	16381	2014	1	1	5	43	3	1	81	NC304xOh7B	DRIL68.071	NA	NA	NA	NA	NA	NA	NA	NA
NLB	16382	2014	1	1	5	43	2	1	82	NC304xOh7B	DRIL68.105	NA	NA	NA	NA	NA	NA	NA	NA
NLB	16385	2014	1	1	5	44	2	1	85	NC304xOh7B	DRIL68.062	NA	NA	NA	NA	NA	NA	NA	NA
NLB	16387	2014	1	1	6	44	4	1	87	NC304xOh7B	DRIL68.102	76	10	10	25	55	22	3	24.7
NLB	16388	2014	1	1	6	44	5	1	88	NC304xOh7B	DRIL68.028	NA	NA	NA	NA	NA	NA	NA	NA
NLB	16389	2014	1	1	6	44	6	1	89	NC304xOh7B	DRIL68.042	NA	NA	NA	NA	NA	NA	NA	NA
NLB	16390	2014	1	1	6	44	7	1	90	NC304xOh7B	DRIL68.033	NA	NA	NA	NA	NA	NA	NA	NA
NLB	16392	2014	1	1	6	44	9	1	92	NC304xOh7B	DRIL68.004	NA	NA	NA	NA	NA	NA	NA	NA
NLB	16394	2014	1	1	6	44	11	1	94	NC304xOh7B	DRIL68.012	76	20	25	35	65	22	9	36.1
NLB	16396	2014	1	1	6	44	13	1	96	NC304xOh7B	DRIL68.024	NA	NA	NA	NA	NA	NA	NA	NA
NLB	16397	2014	1	1	6	44	14	1	97	NC304xOh7B	DRIL68.125	76	20	20	20	65	16	89	29.4
NLB	16398	2014	1	1	6	44	15	1	98	NC304xOh7B	DRIL68.061	76	25	25	35	65	NA	3	36.9
NLB	16399	2014	1	1	6	44	16	1	99	NC304xOh7B	DRIL68.076	76	25	35	55	95	NA	3	53.1
NLB	16404	2014	1	1	7	44	21	1	104	NC304xOh7B	DRIL68.044	76	25	40	55	95	26	19	54.6
NLB	16405	2014	1	1	7	44	22	1	105	NC304xOh7B	DRIL68.111	76	10	15	50	90	24	5	42.3
NLB	16406	2014	1	1	7	44	23	1	106	NC304xOh7B	DRIL68.070	74	25	25	35	65	24	9	36.9
NLB	16408	2014	1	1	7	44	25	1	108	NC304xOh7B	DRIL68.116	74	30	35	55	95	33	32	53.9
NLB	16409	2014	1	1	7	44	26	1	109	NC304xOh7B	DRIL68.098	76	30	40	45	80	25	25	48.6
NLB	16411	2014	1	1	7	44	28	1	111	NC304xOh7B	DRIL68.126	74	25	30	55	95	51	41	51.7
NLB	16412	2014	1	1	7	45	28	1	112	NC304xOh7B	DRIL68.121	74	35	50	60	100	38	37	61.8
NLB	16413	2014	1	1	7	45	27	1	113	NC304xOh7B	DRIL68.014	72	45	60	65	100	56	43	67.9
NLB	16414	2014	1	1	7	45	26	1	114	NC304xOh7B	DRIL68.006	72	40	60	80	100	42	37	72.5
NLB	16415	2014	1	1	7	45	25	1	115	NC304xOh7B	DRIL68.054	74	30	50	60	100	35	37	61
NLB	16416	2014	1	1	7	45	24	1	116	NC304xOh7B	DRIL68.094	74	35	50	55	95	47	37	59
NLB	16418	2014	1	1	7	45	22	1	118	NC304xOh7B	DRIL68.081	76	20	30	50	90	31	1	48.1
NLB	16419	2014	1	1	7	45	21	1	119	NC304xOh7B	DRIL68.075	76	20	35	55	95	31	32	52.4
NLB	16420	2014	1	1	8	45	20	1	120	NC304xOh7B	DRIL68.095	76	20	25	50	90	NA	21	46.7
NLB	16421	2014	1	1	8	45	19	1	121	NC304xOh7B	DRIL68.003	76	20	25	35	65	29	13	36.1
NLB	16422	2014	1	1	8	45	18	1	122	NC304xOh7B	DRIL68.048	NA	NA	NA	NA	NA	NA	NA	NA
NLB	16423	2014	1	1	8	45	17	1	123	NC304xOh7B	DRIL68.002	74	30	40	60	100	35	13	58.1
NLB	16425	2014	1	1	8	45	15	1	125	NC304xOh7B	DRIL68.096	76	20	30	30	65	26	1	35.8
NLB	16427	2014	1	1	8	45	13	1	127	NC304xOh7B	DRIL68.103	NA	NA	NA	NA	NA	NA	NA	NA
NLB	16428	2014	1	1	8	45	12	1	128	NC304xOh7B	DRIL68.087	76	20	20	25	60	26	17	30.1
NLB	16429	2014	1	1	8	45	11	1	129	NC304xOh7B	DRIL68.052	NA	NA	NA	NA	NA	NA	NA	NA
NLB	16430	2014	1	1	8	45	10	1	130	NC304xOh7B	DRIL68.025	NA	NA	NA	NA	NA	NA	NA	NA
NLB	16432	2014	1	1	8	45	8	1	132	NC304xOh7B	DRIL68.108	NA	NA	NA	NA	NA	NA	NA	NA
NLB	16435	2014	1	1	8	45	5	1	135	NC304xOh7B	DRIL68.049	NA	NA	NA	NA	NA	NA	NA	NA
NLB	16436	2014	1	1	8	45	4	1	136	NC304xOh7B	DRIL68.021	NA	NA	NA	NA	NA	NA	NA	NA
NLB	16437	2014	1	1	9	45	3	1	137	NC304xOh7B	DRIL68.053	NA	NA	NA	NA	NA	NA	NA	NA
NLB	16439	2014	1	1	9	45	1	1	139	NC304xOh7B	DRIL68.036	76	25	25	45	85	11	94	44.6
NLB	16441	2014	1	1	9	46	2	1	141	NC304xOh7B	DRIL68.072	76	10	10	25	55	38	27	24.7
NLB	16442	2014	1	1	9	46	3	1	142	NC304xOh7B	DRIL68.056	76	20	20	20	55	24	3	27.3
NLB	16443	2014	1	1	9	46	4	1	143	NC304xOh7B	DRIL68.064	76	20	20	35	65	30	25	34.7
NLB	16445	2014	1	1	9	46	6	1	145	NC304xOh7B	DRIL68.039	NA	NA	NA	NA	NA	NA	NA	NA
NLB	16446	2014	1	1	9	46	7	1	146	NC304xOh7B	DRIL68.127	NA	NA	NA	NA	NA	NA	NA	NA
NLB	16447	2014	1	1	9	46	8	1	147	NC304xOh7B	DRIL68.019	NA	NA	NA	NA	NA	NA	NA	NA
NLB	16449	2014	1	1	9	46	10	1	149	NC304xOh7B	DRIL68.092	NA	NA	NA	NA	NA	NA	NA	NA
NLB	16451	2014	1	1	9	46	12	1	151	NC304xOh7B	DRIL68.099	76	25	25	55	95	16	101	50.2
NLB	16452	2014	1	1	9	46	13	1	152	NC304xOh7B	DRIL68.029	NA	NA	NA	NA	NA	NA	NA	NA
NLB	21061	2014	1	2	1	6	18	1	157	NC304xOh7B	DRIL68.077	72	50	60	85	NA	35	23	62.5
NLB	21062	2014	1	2	1	6	19	1	158	NC304xOh7B	DRIL68.109	72	55	55	75	NA	31	11	59.3
NLB	21063	2014	1	2	1	6	20	1	159	NC304xOh7B	DRIL68.032	70	50	60	90	NA	38	34	63.6
NLB	21064	2014	1	2	1	6	21	1	160	NC304xOh7B	DRIL68.014	71	55	55	85	NA	51	21	61.4
NLB	21065	2014	1	2	1	6	22	1	161	NC304xOh7B	DRIL68.029	73	55	55	75	NA	42	7	59.3
NLB	21066	2014	1	2	1	6	23	1	162	NC304xOh7B	DRIL68.119	76	50	60	75	NA	38	13	60.4
NLB	21068	2014	1	2	1	6	25	1	164	NC304xOh7B	DRIL68.126	74	50	60	70	NA	26	9	59.3
NLB	21069	2014	1	2	1	6	26	1	165	NC304xOh7B	DRIL68.033	74	50	65	95	NA	35	25	67.1
NLB	21070	2014	1	2	1	6	27	1	166	NC304xOh7B	DRIL68.034	74	35	45	60	NA	18	89	45.4
NLB	21071	2014	1	2	1	6	28	1	167	NC304xOh7B	DRIL68.003	75	45	45	65	NA	31	17	49.3
NLB	21074	2014	1	2	1	7	26	1	170	NC304xOh7B	DRIL68.068	74	50	55	65	NA	38	19	55.7
NLB	21075	2014	1	2	2	7	25	1	171	NC304xOh7B	DRIL68.071	NA	50	55	65	NA	47	25	55.7
NLB	21076	2014	1	2	2	7	24	1	172	NC304xOh7B	DRIL68.076	NA	50	55	75	NA	35	16	57.9
NLB	21077	2014	1	2	2	7	23	1	173	NC304xOh7B	DRIL68.031	71	50	55	65	NA	38	27	55.7
NLB	21078	2014	1	2	2	7	22	1	174	NC304xOh7B	DRIL68.085	NA	45	45	65	NA	51	30	49.3
NLB	21080	2014	1	2	2	7	20	1	176	NC304xOh7B	DRIL68.112	74	50	55	75	NA	38	32	57.9
NLB	21085	2014	1	2	2	7	15	1	181	NC304xOh7B	DRIL68.122	75	50	55	75	NA	26	7	57.9
NLB	21086	2014	1	2	2	7	14	1	182	NC304xOh7B	DRIL68.086	75	55	65	70	NA	51	30	63.2
NLB	21087	2014	1	2	2	7	13	1	183	NC304xOh7B	DRIL68.061	75	50	55	75	NA	38	11	57.9
NLB	21090	2014	1	2	2	7	10	1	186	NC304xOh7B	DRIL68.115	71	35	45	65	NA	60	41	46.4
NLB	21091	2014	1	2	2	7	9	1	187	NC304xOh7B	DRIL68.026	73	50	50	65	NA	42	43	53.2
NLB	21092	2014	1	2	3	7	8	1	188	NC304xOh7B	DRIL68.097	71	40	50	65	NA	38	37	50.4
NLB	21094	2014	1	2	3	7	6	1	190	NC304xOh7B	DRIL68.019	71	65	75	95	NA	56	66	76.4
NLB	21095	2014	1	2	3	7	5	1	191	NC304xOh7B	DRIL68.018	70	60	70	85	NA	56	66	70.4
NLB	21096	2014	1	2	3	7	4	1	192	NC304xOh7B	DRIL68.072	70	50	65	70	NA	3	65	61.8
NLB	21097	2014	1	2	3	7	3	1	193	NC304xOh7B	DRIL68.074	71	50	55	65	NA	63	60	55.7
NLB	21098	2014	1	2	3	7	2	1	194	NC304xOh7B	DRIL68.084	71	35	60	70	NA	56	50	55
NLB	21100	2014	1	2	3	8	1	1	196	NC304xOh7B	DRIL68.103	70	45	55	70	NA	5	67	55.4
NLB	21102	2014	1	2	3	8	3	1	198	NC304xOh7B	DRIL68.101	72	35	45	65	NA	60	46	46.4
NLB	21103	2014	1	2	3	8	4	1	199	NC304xOh7B	DRIL68.038	70	55	70	85	NA	5	57	68.9
NLB	21104	2014	1	2	3	8	5	1	200	NC304xOh7B	DRIL68.054	70	40	60	70	NA	56	60	56.4
NLB	21105	2014	1	2	3	8	6	1	201	NC304xOh7B	DRIL68.116	72	55	65	90	NA	63	52	67.5
NLB	21107	2014	1	2	3	8	8	1	203	NC304xOh7B	DRIL68.073	70	40	55	75	NA	47	58	55
NLB	21108	2014	1	2	3	8	9	1	204	NC304xOh7B	DRIL68.004	70	60	70	90	NA	51	70	71.4
NLB	21109	2014	1	2	4	8	10	1	205	NC304xOh7B	DRIL68.106	70	50	55	70	NA	45	34	56.8
NLB	21110	2014	1	2	4	8	11	1	206	NC304xOh7B	DRIL68.021	70	60	65	90	NA	63	66	68.9
NLB	21113	2014	1	2	4	8	14	1	209	NC304xOh7B	DRIL68.064	74	50	55	70	NA	42	25	56.8
NLB	21115	2014	1	2	4	8	16	1	211	NC304xOh7B	DRIL68.028	72	45	55	70	NA	51	48	55.4
NLB	21116	2014	1	2	4	8	17	1	212	NC304xOh7B	DRIL68.040	76	15	30	35	NA	42	28	26.8
NLB	21117	2014	1	2	4	8	18	1	213	NC304xOh7B	DRIL68.010	NA	50	55	60	NA	47	30	54.6
NLB	21119	2014	1	2	4	8	20	1	215	NC304xOh7B	DRIL68.121	72	60	60	85	NA	51	37	65.4
NLB	21120	2014	1	2	4	8	21	1	216	NC304xOh7B	DRIL68.008	75	40	55	70	NA	51	50	53.9
NLB	21121	2014	1	2	4	8	22	1	217	NC304xOh7B	DRIL68.044	75	50	55	85	NA	38	25	60
NLB	21123	2014	1	2	4	8	24	1	219	NC304xOh7B	DRIL68.105	75	40	50	60	NA	26	6	49.3
NLB	21124	2014	1	2	4	8	25	1	220	NC304xOh7B	DRIL68.022	75	50	50	75	NA	38	21	55.4
NLB	21125	2014	1	2	4	8	26	1	221	NC304xOh7B	DRIL68.069	77	55	55	85	NA	35	11	61.4
NLB	21126	2014	1	2	5	8	27	1	222	NC304xOh7B	DRIL68.090	74	50	60	80	NA	51	41	61.4
NLB	21128	2014	1	2	5	9	28	1	224	NC304xOh7B	DRIL68.088	74	45	55	85	NA	51	11	58.6
NLB	21129	2014	1	2	5	9	27	1	225	NC304xOh7B	DRIL68.041	74	40	55	70	NA	42	25	53.9
NLB	21131	2014	1	2	5	9	25	1	227	NC304xOh7B	DRIL68.027	74	50	60	75	NA	42	25	60.4
NLB	21133	2014	1	2	5	9	23	1	229	NC304xOh7B	DRIL68.005	75	55	65	85	NA	31	21	66.4
NLB	21135	2014	1	2	5	9	21	1	231	NC304xOh7B	DRIL68.102	77	40	50	65	NA	38	13	50.4
NLB	21137	2014	1	2	5	9	19	1	233	NC304xOh7B	DRIL68.036	74	55	65	85	NA	51	37	66.4
NLB	21141	2014	1	2	5	9	15	1	237	NC304xOh7B	DRIL68.104	76	50	55	75	NA	27	9	57.9
NLB	21142	2014	1	2	5	9	14	1	238	NC304xOh7B	DRIL68.092	76	45	50	65	NA	42	25	51.8
NLB	21143	2014	1	2	6	9	13	1	239	NC304xOh7B	DRIL68.023	74	50	60	80	NA	51	32	61.4
NLB	21144	2014	1	2	6	9	12	1	240	NC304xOh7B	DRIL68.042	72	45	55	75	NA	51	34	56.4
NLB	21145	2014	1	2	6	9	11	1	241	NC304xOh7B	DRIL68.048	71	55	65	85	NA	51	50	66.4
NLB	21147	2014	1	2	6	9	9	1	243	NC304xOh7B	DRIL68.111	70	40	55	65	NA	47	52	52.9
NLB	21148	2014	1	2	6	9	8	1	244	NC304xOh7B	DRIL68.094	70	40	55	65	NA	63	66	52.9
NLB	21149	2014	1	2	6	9	7	1	245	NC304xOh7B	DRIL68.114	70	40	55	65	NA	63	69	52.9
NLB	21151	2014	1	2	6	9	5	1	247	NC304xOh7B	DRIL68.118	70	35	45	55	NA	47	50	44.3
NLB	21153	2014	1	2	6	9	3	1	249	NC304xOh7B	DRIL68.047	71	50	55	75	NA	51	50	57.9
NLB	21154	2014	1	2	6	9	2	1	250	NC304xOh7B	DRIL68.117	72	20	20	35	NA	31	25	23.2
NLB	21155	2014	1	2	6	9	1	1	251	NC304xOh7B	DRIL68.039	70	35	40	55	NA	51	65	41.8
NLB	21156	2014	1	2	6	10	1	1	252	NC304xOh7B	DRIL68.002	70	40	55	75	NA	60	41	55
NLB	21157	2014	1	2	6	10	2	1	253	NC304xOh7B	DRIL68.016	71	50	55	80	NA	63	69	58.9
NLB	21158	2014	1	2	6	10	3	1	254	NC304xOh7B	DRIL68.127	70	35	40	50	NA	60	62	40.7
NLB	21159	2014	1	2	6	10	4	1	255	NC304xOh7B	DRIL68.082	71	50	55	75	NA	60	58	57.9
NLB	21162	2014	1	2	7	10	7	1	258	NC304xOh7B	DRIL68.035	72	40	55	80	NA	56	58	56.1
NLB	21163	2014	1	2	7	10	8	1	259	NC304xOh7B	DRIL68.037	71	55	65	85	NA	60	66	66.4
NLB	21164	2014	1	2	7	10	9	1	260	NC304xOh7B	DRIL68.098	72	55	60	80	NA	51	62	62.9
NLB	21165	2014	1	2	7	10	10	1	261	NC304xOh7B	DRIL68.049	70	55	65	85	NA	51	64	66.4
NLB	21167	2014	1	2	7	10	12	1	263	NC304xOh7B	DRIL68.043	69	55	65	90	NA	60	58	67.5
NLB	21168	2014	1	2	7	10	13	1	264	NC304xOh7B	DRIL68.015	72	55	60	85	NA	6	72	63.9
NLB	21169	2014	1	2	7	10	14	1	265	NC304xOh7B	DRIL68.125	71	45	50	75	NA	47	46	53.9
NLB	21170	2014	1	2	7	10	15	1	266	NC304xOh7B	DRIL68.006	71	55	70	90	NA	51	57	70
NLB	21171	2014	1	2	7	10	16	1	267	NC304xOh7B	DRIL68.024	72	55	60	85	NA	51	46	63.9
NLB	21172	2014	1	2	7	10	17	1	268	NC304xOh7B	DRIL68.053	72	55	65	85	NA	54	41	66.4
NLB	21173	2014	1	2	7	10	18	1	269	NC304xOh7B	DRIL68.096	72	45	65	75	NA	35	27	61.4
NLB	21174	2014	1	2	7	10	19	1	270	NC304xOh7B	DRIL68.007	74	35	55	70	NA	51	32	52.5
NLB	21175	2014	1	2	7	10	20	1	271	NC304xOh7B	DRIL68.091	72	40	55	65	NA	47	41	52.9
NLB	21182	2014	1	2	8	10	27	1	278	NC304xOh7B	DRIL68.081	75	30	55	70	NA	35	16	51.1
NLB	21183	2014	1	2	8	10	28	1	279	NC304xOh7B	DRIL68.089	72	60	70	95	NA	62	46	72.5
NLB	21184	2014	1	2	8	11	28	1	280	NC304xOh7B	DRIL68.017	74	50	65	85	NA	56	48	65
NLB	21185	2014	1	2	8	11	27	1	281	NC304xOh7B	DRIL68.087	73	50	55	80	NA	35	41	58.9
NLB	21186	2014	1	2	8	11	26	1	282	NC304xOh7B	DRIL68.060	76	50	55	70	NA	31	11	56.8
NLB	21187	2014	1	2	8	11	25	1	283	NC304xOh7B	DRIL68.025	77	45	50	70	NA	31	9	52.9
NLB	21188	2014	1	2	8	11	24	1	284	NC304xOh7B	DRIL68.056	74	15	30	55	NA	29	11	31.1
NLB	21191	2014	1	2	8	11	21	1	287	NC304xOh7B	DRIL68.123	72	40	50	70	NA	26	101	51.4
NLB	21192	2014	1	2	8	11	20	1	288	NC304xOh7B	DRIL68.078	76	50	55	80	NA	35	21	58.9
NLB	21193	2014	1	2	8	11	19	1	289	NC304xOh7B	DRIL68.051	74	55	65	90	NA	49	34	67.5
NLB	21194	2014	1	2	9	11	18	1	290	NC304xOh7B	DRIL68.046	73	55	65	90	NA	60	43	67.5
NLB	21196	2014	1	2	9	11	16	1	292	NC304xOh7B	DRIL68.055	71	50	60	85	NA	38	41	62.5
NLB	21197	2014	1	2	9	11	15	1	293	NC304xOh7B	DRIL68.095	68	60	70	85	NA	60	65	70.4
NLB	21198	2014	1	2	9	11	14	1	294	NC304xOh7B	DRIL68.100	75	45	50	65	NA	31	25	51.8
NLB	21199	2014	1	2	9	11	13	1	295	NC304xOh7B	DRIL68.030	74	50	55	75	NA	56	48	57.9
NLB	21200	2014	1	2	9	11	12	1	296	NC304xOh7B	DRIL68.067	66	35	50	65	NA	10	76	48.9
NLB	21202	2014	1	2	9	11	10	1	298	NC304xOh7B	DRIL68.062	72	50	65	75	NA	56	41	62.9
NLB	21203	2014	1	2	9	11	9	1	299	NC304xOh7B	DRIL68.080	71	55	70	85	NA	56	70	68.9
NLB	21204	2014	1	2	9	11	8	1	300	NC304xOh7B	DRIL68.108	72	20	45	65	NA	51	28	42.1
NLB	21206	2014	1	2	9	11	6	1	302	NC304xOh7B	DRIL68.083	72	50	55	85	NA	31	25	60
NLB	21207	2014	1	2	9	11	5	1	303	NC304xOh7B	DRIL68.070	68	40	55	65	NA	56	67	52.9
NLB	21209	2014	1	2	9	11	3	1	305	NC304xOh7B	DRIL68.099	72	50	65	85	NA	60	41	65
NLB	21210	2014	1	2	9	11	2	1	306	NC304xOh7B	DRIL68.075	70	20	45	60	NA	51	62	41.1
NLB	17790	2015	1	1	1	17	10	1	1	NC304xOh7B	DRIL68.021	67	30	35	55	60	63	46	45
NLB	17791	2015	1	1	1	17	9	1	2	NC304xOh7B	DRIL68.063	69	30	35	55	85	56	54	48.8
NLB	17794	2015	1	1	1	17	6	1	5	NC304xOh7B	DRIL68.040	74	15	15	25	30	47	37	20.8
NLB	17795	2015	1	1	1	17	5	1	6	NC304xOh7B	DRIL68.088	74	20	30	45	75	60	54	40.6
NLB	17796	2015	1	1	1	17	4	1	7	NC304xOh7B	DRIL68.105	71	20	30	45	75	47	28	40.6
NLB	17797	2015	1	1	1	17	3	1	8	NC304xOh7B	DRIL68.018	71	25	30	50	60	35	50	40.8
NLB	17799	2015	1	1	1	17	1	1	10	NC304xOh7B	DRIL68.084	74	30	35	45	60	63	69	41.5
NLB	17804	2015	1	1	1	18	5	1	15	NC304xOh7B	DRIL68.125	65	30	30	50	75	42	25	43.8
NLB	17805	2015	1	1	1	18	6	1	16	NC304xOh7B	DRIL68.017	75	20	35	50	65	56	54	42.5
NLB	17806	2015	1	1	1	18	7	1	17	NC304xOh7B	DRIL68.095	66	20	30	50	70	51	37	41.5
NLB	17808	2015	1	1	2	18	9	1	19	NC304xOh7B	DRIL68.086	73	25	35	55	80	3	37	47.3
NLB	17809	2015	1	1	2	18	10	1	20	NC304xOh7B	DRIL68.012	66	30	35	45	75	3	67	43.8
NLB	17810	2015	1	1	2	18	11	1	21	NC304xOh7B	DRIL68.108	75	10	10	40	65	47	32	28.8
NLB	17814	2015	1	1	2	18	15	1	25	NC304xOh7B	DRIL68.089	73	25	40	55	80	60	62	49
NLB	17815	2015	1	1	2	18	16	1	26	NC304xOh7B	DRIL68.121	73	25	35	50	65	56	46	43.3
NLB	17816	2015	1	1	2	18	17	1	27	NC304xOh7B	DRIL68.100	73	25	35	55	75	47	50	46.5
NLB	17817	2015	1	1	2	18	18	1	28	NC304xOh7B	DRIL68.071	74	30	35	50	85	60	46	47.1
NLB	17818	2015	1	1	2	18	19	1	29	NC304xOh7B	DRIL68.041	73	20	40	65	85	38	32	52.5
NLB	17819	2015	1	1	2	18	20	1	30	NC304xOh7B	DRIL68.119	74	25	25	45	70	56	41	38.8
NLB	17821	2015	1	1	2	18	22	1	32	NC304xOh7B	DRIL68.117	75	5	10	30	55	26	3	23.1
NLB	17822	2015	1	1	2	18	23	1	33	NC304xOh7B	DRIL68.127	69	15	20	40	80	60	54	35.4
NLB	17824	2015	1	1	3	18	25	1	35	NC304xOh7B	DRIL68.044	75	25	40	65	75	47	54	51.7
NLB	17825	2015	1	1	3	18	26	1	36	NC304xOh7B	DRIL68.102	76	20	20	45	65	42	17	35.6
NLB	17826	2015	1	1	3	18	27	1	37	NC304xOh7B	DRIL68.109	75	15	25	35	55	35	25	31.5
NLB	17827	2015	1	1	3	18	28	1	38	NC304xOh7B	DRIL68.099	75	25	30	55	75	51	41	44.8
NLB	17829	2015	1	1	3	19	27	1	40	NC304xOh7B	DRIL68.061	75	25	30	50	65	51	50	41.5
NLB	17830	2015	1	1	3	19	26	1	41	NC304xOh7B	DRIL68.070	69	30	30	50	65	51	37	42.3
NLB	17831	2015	1	1	3	19	25	1	42	NC304xOh7B	DRIL68.037	75	25	35	55	75	60	46	46.5
NLB	17832	2015	1	1	3	19	24	1	43	NC304xOh7B	DRIL68.103	75	15	30	45	65	38	41	38.3
NLB	17834	2015	1	1	3	19	22	1	45	NC304xOh7B	DRIL68.097	70	20	30	45	75	35	9	40.6
NLB	17835	2015	1	1	3	19	21	1	46	NC304xOh7B	DRIL68.029	71	10	25	45	65	56	54	35.8
NLB	17836	2015	1	1	3	19	20	1	47	NC304xOh7B	DRIL68.051	70	25	30	60	75	47	65	46.5
NLB	17837	2015	1	1	3	19	19	1	48	NC304xOh7B	DRIL68.015	75	25	30	60	80	47	41	47.3
NLB	17838	2015	1	1	3	19	18	1	49	NC304xOh7B	DRIL68.048	69	35	40	60	85	56	54	53.1
NLB	17839	2015	1	1	3	19	17	1	50	NC304xOh7B	DRIL68.002	69	30	40	50	75	51	41	47.3
NLB	17840	2015	1	1	3	19	16	1	51	NC304xOh7B	DRIL68.075	73	30	40	55	70	38	50	48.3
NLB	17841	2015	1	1	4	19	15	1	52	NC304xOh7B	DRIL68.026	74	20	35	45	60	42	46	40
NLB	17842	2015	1	1	4	19	14	1	53	NC304xOh7B	DRIL68.064	70	25	30	45	65	63	62	39.8
NLB	17843	2015	1	1	4	19	13	1	54	NC304xOh7B	DRIL68.076	74	25	35	55	65	60	62	45
NLB	17845	2015	1	1	4	19	11	1	56	NC304xOh7B	DRIL68.008	72	25	35	50	80	3	62	45.6
NLB	17848	2015	1	1	4	19	8	1	59	NC304xOh7B	DRIL68.023	70	30	40	50	75	42	50	47.3
NLB	17849	2015	1	1	4	19	7	1	60	NC304xOh7B	DRIL68.077	74	15	30	50	70	56	41	40.8
NLB	17851	2015	1	1	4	19	5	1	62	NC304xOh7B	DRIL68.111	70	20	20	45	70	51	46	36.3
NLB	17852	2015	1	1	4	19	4	1	63	NC304xOh7B	DRIL68.004	68	25	35	50	65	60	41	43.3
NLB	17857	2015	1	1	4	20	2	1	68	NC304xOh7B	DRIL68.080	71	25	35	50	70	47	62	44
NLB	17858	2015	1	1	5	20	3	1	69	NC304xOh7B	DRIL68.025	73	20	35	45	85	42	50	43.8
NLB	17859	2015	1	1	5	20	4	1	70	NC304xOh7B	DRIL68.114	69	20	35	45	85	51	62	43.8
NLB	17860	2015	1	1	5	20	5	1	71	NC304xOh7B	DRIL68.073	70	20	25	40	55	63	58	34
NLB	17861	2015	1	1	5	20	6	1	72	NC304xOh7B	DRIL68.030	75	15	20	40	55	51	46	31.5
NLB	17864	2015	1	1	5	20	9	1	75	NC304xOh7B	DRIL68.006	68	30	40	55	85	51	46	50.6
NLB	17866	2015	1	1	5	20	11	1	77	NC304xOh7B	DRIL68.014	67	35	45	55	85	42	41	53.1
NLB	17867	2015	1	1	5	20	12	1	78	NC304xOh7B	DRIL68.035	75	15	30	50	80	47	46	42.3
NLB	17871	2015	1	1	5	20	16	1	82	NC304xOh7B	DRIL68.116	74	25	30	50	75	3	58	43.1
NLB	17872	2015	1	1	5	20	17	1	83	NC304xOh7B	DRIL68.005	71	30	40	50	80	51	54	48.1
NLB	17873	2015	1	1	5	20	18	1	84	NC304xOh7B	DRIL68.104	74	25	30	50	75	38	25	43.1
NLB	17874	2015	1	1	5	20	19	1	85	NC304xOh7B	DRIL68.028	75	25	30	50	75	3	65	43.1
NLB	17875	2015	1	1	6	20	20	1	86	NC304xOh7B	DRIL68.007	75	20	25	35	55	56	41	32.3
NLB	17876	2015	1	1	6	20	21	1	87	NC304xOh7B	DRIL68.094	75	25	35	45	65	3	67	41.5
NLB	17877	2015	1	1	6	20	22	1	88	NC304xOh7B	DRIL68.087	71	25	35	50	70	3	69	44
NLB	17878	2015	1	1	6	20	23	1	89	NC304xOh7B	DRIL68.092	72	15	25	40	60	38	32	34
NLB	17879	2015	1	1	6	20	24	1	90	NC304xOh7B	DRIL68.047	74	25	35	55	70	56	54	45.8
NLB	17880	2015	1	1	6	20	25	1	91	NC304xOh7B	DRIL68.049	75	25	35	50	65	42	58	43.3
NLB	17881	2015	1	1	6	20	26	1	92	NC304xOh7B	DRIL68.118	74	10	15	40	65	31	21	30.6
NLB	17884	2015	1	1	6	21	28	1	95	NC304xOh7B	DRIL68.072	75	15	20	45	75	47	28	36.3
NLB	17886	2015	1	1	6	21	26	1	97	NC304xOh7B	DRIL68.032	NA	NA	NA	NA	NA	NA	NA	NA
NLB	17887	2015	1	1	6	21	25	1	98	NC304xOh7B	DRIL68.019	74	35	40	55	75	51	32	49.8
NLB	17888	2015	1	1	6	21	24	1	99	NC304xOh7B	DRIL68.027	67	30	40	45	75	47	32	45.6
NLB	17889	2015	1	1	6	21	23	1	100	NC304xOh7B	DRIL68.112	72	15	30	45	60	56	62	37.5
NLB	17890	2015	1	1	6	21	22	1	101	NC304xOh7B	DRIL68.046	70	30	40	55	85	3	69	50.6
NLB	17891	2015	1	1	6	21	21	1	102	NC304xOh7B	DRIL68.055	73	20	35	50	65	35	46	42.5
NLB	17892	2015	1	1	7	21	20	1	103	NC304xOh7B	DRIL68.123	67	30	35	55	70	31	21	46.5
NLB	17894	2015	1	1	7	21	18	1	105	NC304xOh7B	DRIL68.054	68	25	35	50	80	63	58	45.6
NLB	17895	2015	1	1	7	21	17	1	106	NC304xOh7B	DRIL68.085	69	20	35	55	75	38	37	45.8
NLB	17896	2015	1	1	7	21	16	1	107	NC304xOh7B	DRIL68.091	70	25	30	50	70	42	54	42.3
NLB	17897	2015	1	1	7	21	15	1	108	NC304xOh7B	DRIL68.053	73	20	35	60	85	38	37	49
NLB	17898	2015	1	1	7	21	14	1	109	NC304xOh7B	DRIL68.081	73	20	30	40	75	51	50	38.8
NLB	17899	2015	1	1	7	21	13	1	110	NC304xOh7B	DRIL68.042	72	20	30	45	75	51	50	40.6
NLB	17901	2015	1	1	7	21	11	1	112	NC304xOh7B	DRIL68.115	70	25	35	45	70	51	41	42.3
NLB	17904	2015	1	1	7	21	8	1	115	NC304xOh7B	DRIL68.060	75	25	40	50	80	42	41	47.3
NLB	17905	2015	1	1	7	21	7	1	116	NC304xOh7B	DRIL68.031	70	30	30	50	65	38	32	42.3
NLB	17906	2015	1	1	7	21	6	1	117	NC304xOh7B	DRIL68.052	68	30	40	55	85	56	54	50.6
NLB	17907	2015	1	1	7	21	5	1	118	NC304xOh7B	DRIL68.101	71	25	30	45	60	47	37	39
NLB	17908	2015	1	1	7	21	4	1	119	NC304xOh7B	DRIL68.036	73	25	35	45	75	60	54	43.1
NLB	17909	2015	1	1	8	21	3	1	120	NC304xOh7B	DRIL68.010	75	15	25	45	65	56	62	36.5
NLB	17910	2015	1	1	8	21	2	1	121	NC304xOh7B	DRIL68.039	70	30	35	40	60	56	58	39.8
NLB	17913	2015	1	1	8	22	2	1	124	NC304xOh7B	DRIL68.024	71	35	40	50	75	51	50	48.1
NLB	17914	2015	1	1	8	22	3	1	125	NC304xOh7B	DRIL68.067	69	30	35	45	75	63	72	43.8
NLB	17915	2015	1	1	8	22	4	1	126	NC304xOh7B	DRIL68.068	67	30	35	55	75	51	58	47.3
NLB	17917	2015	1	1	8	22	6	1	128	NC304xOh7B	DRIL68.043	72	30	40	55	80	60	41	49.8
NLB	17918	2015	1	1	8	22	7	1	129	NC304xOh7B	DRIL68.056	69	5	15	30	60	38	46	25.6
NLB	17920	2015	1	1	8	22	9	1	131	NC304xOh7B	DRIL68.003	76	25	40	55	75	51	41	48.3
NLB	17921	2015	1	1	8	22	10	1	132	NC304xOh7B	DRIL68.034	72	10	15	50	85	29	6	37.1
NLB	17922	2015	1	1	8	22	11	1	133	NC304xOh7B	DRIL68.069	70	25	35	55	80	51	50	47.3
NLB	17923	2015	1	1	8	22	12	1	134	NC304xOh7B	DRIL68.126	73	20	35	50	65	38	41	42.5
NLB	17924	2015	1	1	8	22	13	1	135	NC304xOh7B	DRIL68.022	72	25	40	55	85	63	58	49.8
NLB	17925	2015	1	1	8	22	14	1	136	NC304xOh7B	DRIL68.083	76	35	35	55	80	42	37	48.8
NLB	17926	2015	1	1	9	22	15	1	137	NC304xOh7B	DRIL68.096	75	15	25	45	70	29	1	37.3
NLB	17927	2015	1	1	9	22	16	1	138	NC304xOh7B	DRIL68.016	75	20	35	55	80	47	54	46.5
NLB	17929	2015	1	1	9	22	18	1	140	NC304xOh7B	DRIL68.062	75	20	30	55	70	47	46	43.3
NLB	17930	2015	1	1	9	22	19	1	141	NC304xOh7B	DRIL68.098	75	30	45	55	80	51	37	51.5
NLB	17932	2015	1	1	9	22	21	1	143	NC304xOh7B	DRIL68.106	75	20	25	45	70	38	21	38.1
NLB	17933	2015	1	1	9	22	22	1	144	NC304xOh7B	DRIL68.038	72	25	35	55	80	3	37	47.3
NLB	17934	2015	1	1	9	22	23	1	145	NC304xOh7B	DRIL68.082	75	20	30	55	80	38	58	44.8
NLB	17935	2015	1	1	9	22	24	1	146	NC304xOh7B	DRIL68.122	72	20	25	45	75	35	21	38.8
NLB	17937	2015	1	1	9	22	26	1	148	NC304xOh7B	DRIL68.090	72	30	35	55	85	51	62	48.8
NLB	17939	2015	1	1	9	22	28	1	150	NC304xOh7B	DRIL68.078	74	25	35	55	80	60	58	47.3
NLB	17940	2015	1	1	9	23	28	1	151	NC304xOh7B	DRIL68.074	73	25	35	45	65	56	50	41.5
NLB	17941	2015	1	1	9	23	27	1	152	NC304xOh7B	DRIL68.033	75	30	35	55	80	56	58	48.1
NLB	20778	2015	1	2	1	43	9	1	155	NC304xOh7B	DRIL68.031	74	15	30	45	70	47	37	39
NLB	20779	2015	1	2	1	43	8	1	156	NC304xOh7B	DRIL68.035	75	10	25	45	70	47	28	36.5
NLB	20780	2015	1	2	1	43	7	1	157	NC304xOh7B	DRIL68.007	75	15	35	55	75	47	46	45
NLB	20782	2015	1	2	1	43	5	1	159	NC304xOh7B	DRIL68.121	72	20	35	50	70	47	46	43.3
NLB	20783	2015	1	2	1	43	4	1	160	NC304xOh7B	DRIL68.102	75	20	35	40	65	35	17	39
NLB	20784	2015	1	2	1	43	3	1	161	NC304xOh7B	DRIL68.021	NA	NA	NA	NA	NA	NA	NA	NA
NLB	20785	2015	1	2	1	43	2	1	162	NC304xOh7B	DRIL68.010	75	10	15	45	65	47	41	32.3
NLB	20786	2015	1	2	1	43	1	1	163	NC304xOh7B	DRIL68.025	72	10	25	45	70	51	50	36.5
NLB	20790	2015	1	2	1	44	4	1	167	NC304xOh7B	DRIL68.118	72	10	10	35	50	42	21	24.8
NLB	20791	2015	1	2	1	44	5	1	168	NC304xOh7B	DRIL68.023	72	20	35	55	75	56	25	45.8
NLB	20793	2015	1	2	1	44	7	1	170	NC304xOh7B	DRIL68.091	75	10	20	45	55	47	50	32.5
NLB	20797	2015	1	2	2	44	11	1	174	NC304xOh7B	DRIL68.123	69	15	25	50	70	35	25	39
NLB	20798	2015	1	2	2	44	12	1	175	NC304xOh7B	DRIL68.127	72	10	25	30	50	51	50	28.3
NLB	20801	2015	1	2	2	44	15	1	178	NC304xOh7B	DRIL68.078	72	15	25	50	70	51	50	39
NLB	20803	2015	1	2	2	44	17	1	180	NC304xOh7B	DRIL68.056	74	10	15	40	55	35	32	29
NLB	20804	2015	1	2	2	44	18	1	181	NC304xOh7B	DRIL68.044	75	10	35	55	75	29	37	44.2
NLB	20806	2015	1	2	2	44	20	1	183	NC304xOh7B	DRIL68.019	73	10	25	50	65	31	28	37.5
NLB	20807	2015	1	2	2	44	21	1	184	NC304xOh7B	DRIL68.027	70	10	30	50	75	38	25	40.8
NLB	20809	2015	1	2	2	44	23	1	186	NC304xOh7B	DRIL68.071	75	10	20	45	55	47	32	32.5
NLB	20812	2015	1	2	3	44	26	1	189	NC304xOh7B	DRIL68.017	75	10	25	45	65	38	28	35.8
NLB	20813	2015	1	2	3	44	27	1	190	NC304xOh7B	DRIL68.081	75	5	15	40	55	31	28	28.3
NLB	20815	2015	1	2	3	45	28	1	192	NC304xOh7B	DRIL68.016	75	10	25	45	75	31	37	37.3
NLB	20818	2015	1	2	3	45	25	1	195	NC304xOh7B	DRIL68.099	75	10	30	45	70	35	32	38.3
NLB	20820	2015	1	2	3	45	23	1	197	NC304xOh7B	DRIL68.083	75	10	25	45	75	24	101	37.3
NLB	20821	2015	1	2	3	45	22	1	198	NC304xOh7B	DRIL68.100	75	10	30	50	70	29	21	40
NLB	20822	2015	1	2	3	45	21	1	199	NC304xOh7B	DRIL68.015	75	10	30	45	70	42	25	38.3
NLB	20823	2015	1	2	3	45	20	1	200	NC304xOh7B	DRIL68.040	75	10	10	35	50	66	25	24.8
NLB	20824	2015	1	2	3	45	19	1	201	NC304xOh7B	DRIL68.072	72	15	30	40	60	60	46	35.8
NLB	20825	2015	1	2	3	45	18	1	202	NC304xOh7B	DRIL68.004	69	20	40	45	75	38	58	44
NLB	20826	2015	1	2	3	45	17	1	203	NC304xOh7B	DRIL68.006	75	20	40	65	90	42	46	53.3
NLB	20827	2015	1	2	3	45	16	1	204	NC304xOh7B	DRIL68.024	75	15	35	50	65	35	32	41.7
NLB	20828	2015	1	2	4	45	15	1	205	NC304xOh7B	DRIL68.105	69	15	35	40	70	42	32	39
NLB	20829	2015	1	2	4	45	14	1	206	NC304xOh7B	DRIL68.005	72	20	35	50	70	60	58	43.3
NLB	20832	2015	1	2	4	45	11	1	209	NC304xOh7B	DRIL68.041	75	10	20	35	70	31	25	31.3
NLB	20833	2015	1	2	4	45	10	1	210	NC304xOh7B	DRIL68.003	75	15	35	40	70	51	50	39
NLB	20834	2015	1	2	4	45	9	1	211	NC304xOh7B	DRIL68.038	70	20	45	50	65	56	54	46
NLB	20835	2015	1	2	4	45	8	1	212	NC304xOh7B	DRIL68.049	73	25	40	50	65	60	67	45
NLB	20836	2015	1	2	4	45	7	1	213	NC304xOh7B	DRIL68.087	73	10	25	45	55	60	65	34.2
NLB	20837	2015	1	2	4	45	6	1	214	NC304xOh7B	DRIL68.116	75	15	30	50	75	51	46	41.5
NLB	20839	2015	1	2	4	45	4	1	216	NC304xOh7B	DRIL68.054	70	20	35	45	70	60	58	41.5
NLB	20840	2015	1	2	4	45	3	1	217	NC304xOh7B	DRIL68.008	NA	NA	NA	NA	NA	NA	NA	NA
NLB	20841	2015	1	2	4	45	2	1	218	NC304xOh7B	DRIL68.103	NA	NA	NA	NA	NA	NA	NA	NA
NLB	20842	2015	1	2	4	45	1	1	219	NC304xOh7B	DRIL68.053	75	10	35	45	75	47	28	40.8
NLB	20843	2015	1	2	4	46	1	1	220	NC304xOh7B	DRIL68.106	75	5	10	45	60	35	17	29
NLB	20844	2015	1	2	4	46	2	1	221	NC304xOh7B	DRIL68.022	72	15	25	45	75	51	46	38.1
NLB	20845	2015	1	2	5	46	3	1	222	NC304xOh7B	DRIL68.104	75	10	25	45	70	31	28	36.5
NLB	20846	2015	1	2	5	46	4	1	223	NC304xOh7B	DRIL68.033	75	25	35	50	70	51	41	44
NLB	20847	2015	1	2	5	46	5	1	224	NC304xOh7B	DRIL68.043	72	10	30	50	70	56	50	40
NLB	20848	2015	1	2	5	46	6	1	225	NC304xOh7B	DRIL68.069	71	10	30	45	65	38	46	37.5
NLB	20849	2015	1	2	5	46	7	1	226	NC304xOh7B	DRIL68.092	72	5	10	30	65	35	41	24.6
NLB	20852	2015	1	2	5	46	10	1	229	NC304xOh7B	DRIL68.037	75	10	30	55	70	47	41	41.7
NLB	20853	2015	1	2	5	46	11	1	230	NC304xOh7B	DRIL68.094	73	5	25	40	55	47	50	31.7
NLB	20855	2015	1	2	5	46	13	1	232	NC304xOh7B	DRIL68.086	73	15	25	45	65	51	54	36.5
NLB	20856	2015	1	2	5	46	14	1	233	NC304xOh7B	DRIL68.026	74	15	25	45	65	51	46	36.5
NLB	20857	2015	1	2	5	46	15	1	234	NC304xOh7B	DRIL68.061	75	10	20	45	75	47	46	35.6
NLB	20859	2015	1	2	5	46	17	1	236	NC304xOh7B	DRIL68.085	70	15	30	50	75	38	21	41.5
NLB	20860	2015	1	2	5	46	18	1	237	NC304xOh7B	DRIL68.088	72	10	30	50	70	51	32	40
NLB	20864	2015	1	2	6	2	3	2	241	NC304xOh7B	DRIL68.074	74	10	20	35	65	56	50	30.6
NLB	20865	2015	1	2	6	2	4	2	242	NC304xOh7B	DRIL68.051	72	10	20	40	70	42	50	33.1
NLB	20867	2015	1	2	6	2	6	2	244	NC304xOh7B	DRIL68.062	75	10	30	45	65	51	41	37.5
NLB	20868	2015	1	2	6	2	7	2	245	NC304xOh7B	DRIL68.012	NA	NA	NA	NA	NA	NA	NA	NA
NLB	20870	2015	1	2	6	2	9	2	247	NC304xOh7B	DRIL68.039	75	10	25	45	65	35	41	35.8
NLB	20871	2015	1	2	6	2	10	2	248	NC304xOh7B	DRIL68.077	75	10	25	50	70	42	32	38.3
NLB	20873	2015	1	2	6	2	12	2	250	NC304xOh7B	DRIL68.014	72	15	30	45	75	31	9	39.8
NLB	20874	2015	1	2	6	2	13	2	251	NC304xOh7B	DRIL68.032	NA	NA	NA	NA	NA	NA	NA	NA
NLB	20875	2015	1	2	6	2	14	2	252	NC304xOh7B	DRIL68.109	75	20	30	45	65	26	1	39
NLB	20876	2015	1	2	6	2	15	2	253	NC304xOh7B	DRIL68.052	NA	NA	NA	NA	NA	NA	NA	NA
NLB	20877	2015	1	2	6	2	16	2	254	NC304xOh7B	DRIL68.125	NA	NA	NA	NA	NA	NA	NA	NA
NLB	20879	2015	1	2	7	2	18	2	256	NC304xOh7B	DRIL68.060	NA	NA	NA	NA	NA	NA	NA	NA
NLB	20880	2015	1	2	7	2	19	2	257	NC304xOh7B	DRIL68.126	75	10	30	40	65	66	89	35.8
NLB	20882	2015	1	2	7	2	21	2	259	NC304xOh7B	DRIL68.101	NA	NA	NA	NA	NA	NA	NA	NA
NLB	20883	2015	1	2	7	2	22	2	260	NC304xOh7B	DRIL68.097	NA	NA	NA	NA	NA	NA	NA	NA
NLB	20884	2015	1	2	7	2	23	2	261	NC304xOh7B	DRIL68.063	NA	NA	NA	NA	NA	NA	NA	NA
NLB	20885	2015	1	2	7	2	24	2	262	NC304xOh7B	DRIL68.111	NA	NA	NA	NA	NA	NA	NA	NA
NLB	20886	2015	1	2	7	2	25	2	263	NC304xOh7B	DRIL68.046	74	15	30	45	80	56	50	40.6
NLB	20887	2015	1	2	7	2	26	2	264	NC304xOh7B	DRIL68.064	71	15	20	35	60	56	54	30.6
NLB	20888	2015	1	2	7	2	27	2	265	NC304xOh7B	DRIL68.119	71	20	20	35	65	47	41	32.1
NLB	20890	2015	1	2	7	3	28	2	267	NC304xOh7B	DRIL68.067	71	10	20	40	70	7	67	33.1
NLB	20891	2015	1	2	7	3	27	2	268	NC304xOh7B	DRIL68.098	72	25	35	60	85	56	37	49.8
NLB	20892	2015	1	2	7	3	26	2	269	NC304xOh7B	DRIL68.082	72	20	45	60	85	51	37	52.5
NLB	20893	2015	1	2	7	3	25	2	270	NC304xOh7B	DRIL68.084	75	20	35	50	85	60	58	45.6
NLB	20894	2015	1	2	7	3	24	2	271	NC304xOh7B	DRIL68.114	73	10	15	40	55	35	50	29
NLB	20895	2015	1	2	7	3	23	2	272	NC304xOh7B	DRIL68.029	69	15	30	55	65	42	46	41.7
NLB	20897	2015	1	2	8	3	21	2	274	NC304xOh7B	DRIL68.002	69	15	35	50	85	38	21	44.8
NLB	20898	2015	1	2	8	3	20	2	275	NC304xOh7B	DRIL68.047	75	20	40	55	85	42	50	49
NLB	20899	2015	1	2	8	3	19	2	276	NC304xOh7B	DRIL68.095	70	25	35	55	90	31	46	48.8
NLB	20900	2015	1	2	8	3	18	2	277	NC304xOh7B	DRIL68.108	75	20	25	50	75	35	13	40.6
NLB	20901	2015	1	2	8	3	17	2	278	NC304xOh7B	DRIL68.080	75	10	40	65	75	66	28	49.4
NLB	20903	2015	1	2	8	3	15	2	280	NC304xOh7B	DRIL68.073	71	15	45	65	85	51	54	53.5
NLB	20904	2015	1	2	8	3	14	2	281	NC304xOh7B	DRIL68.096	72	15	30	40	70	35	6	37.3
NLB	20906	2015	1	2	8	3	12	2	283	NC304xOh7B	DRIL68.076	75	20	30	45	65	38	37	39
NLB	20907	2015	1	2	8	3	11	2	284	NC304xOh7B	DRIL68.028	NA	NA	NA	NA	NA	NA	NA	NA
NLB	20908	2015	1	2	8	3	10	2	285	NC304xOh7B	DRIL68.117	76	5	15	30	45	31	6	23.3
NLB	20910	2015	1	2	8	3	8	2	287	NC304xOh7B	DRIL68.036	75	20	30	40	65	60	62	37.3
NLB	20911	2015	1	2	8	3	7	2	288	NC304xOh7B	DRIL68.068	72	20	35	45	70	51	50	41.5
NLB	20912	2015	1	2	8	3	6	2	289	NC304xOh7B	DRIL68.048	75	15	30	45	65	56	41	38.3
NLB	20914	2015	1	2	9	3	4	2	291	NC304xOh7B	DRIL68.115	75	10	20	40	55	35	28	30.8
NLB	20915	2015	1	2	9	3	3	2	292	NC304xOh7B	DRIL68.042	74	15	25	40	65	35	25	34.8
NLB	20917	2015	1	2	9	3	1	2	294	NC304xOh7B	DRIL68.075	74	15	25	45	65	47	32	36.5
NLB	20920	2015	1	2	9	4	3	2	297	NC304xOh7B	DRIL68.089	75	20	30	50	75	47	41	42.3
NLB	20921	2015	1	2	9	4	4	2	298	NC304xOh7B	DRIL68.018	72	10	25	50	70	38	41	38.3
NLB	20922	2015	1	2	9	4	5	2	299	NC304xOh7B	DRIL68.122	74	20	25	45	65	29	9	37.3
NLB	20923	2015	1	2	9	4	6	2	300	NC304xOh7B	DRIL68.070	72	10	25	45	60	35	25	35
NLB	20924	2015	1	2	9	4	7	2	301	NC304xOh7B	DRIL68.030	NA	NA	NA	NA	NA	NA	NA	NA
NLB	20926	2015	1	2	9	4	9	2	303	NC304xOh7B	DRIL68.055	72	15	30	40	60	35	37	35.8
NLB	20927	2015	1	2	9	4	10	2	304	NC304xOh7B	DRIL68.090	75	15	30	50	70	42	62	40.8
NLB	20928	2015	1	2	9	4	11	2	305	NC304xOh7B	DRIL68.112	72	15	30	45	65	51	41	38.3
NLB	20929	2015	1	2	9	4	12	2	306	NC304xOh7B	DRIL68.034	72	10	25	45	70	31	3	36.5

## Sheet: GLS
trait	plot_nrsry	year	location	rep	block	range	row	field_block	plot_xprmnt	pedigree	entry	dta	sc1	sc2	sc3	sc4	eh	ph	audpc
GLS	33940	2014	1	1	1	105	41	1	1	NC304xOh7B	DRIL68.040	NA	7.5	6	NA	NA	NA	NA	6.8
GLS	33941	2014	1	1	1	105	40	1	2	NC304xOh7B	DRIL68.122	NA	7	6	NA	NA	NA	NA	6.5
GLS	33942	2014	1	1	1	105	39	1	3	NC304xOh7B	DRIL68.116	NA	7.5	5	NA	NA	NA	NA	6.3
GLS	33943	2014	1	1	1	105	38	1	4	NC304xOh7B	DRIL68.006	NA	7.5	6	NA	NA	NA	NA	6.8
GLS	33946	2014	1	1	1	105	35	1	7	NC304xOh7B	DRIL68.092	NA	6	4	NA	NA	NA	NA	5
GLS	33947	2014	1	1	1	105	34	1	8	NC304xOh7B	DRIL68.126	NA	7	5	NA	NA	NA	NA	6
GLS	33948	2014	1	1	1	105	33	1	9	NC304xOh7B	DRIL68.087	NA	6.5	5	NA	NA	NA	NA	5.8
GLS	33950	2014	1	1	1	105	31	1	11	NC304xOh7B	DRIL68.119	NA	7.5	5	NA	NA	NA	NA	6.3
GLS	33951	2014	1	1	1	105	30	1	12	NC304xOh7B	DRIL68.074	NA	7	6.5	NA	NA	NA	NA	6.8
GLS	33953	2014	1	1	1	105	28	1	14	NC304xOh7B	DRIL68.081	NA	6.5	5	NA	NA	NA	NA	5.8
GLS	33954	2014	1	1	1	105	27	1	15	NC304xOh7B	DRIL68.062	NA	6.5	5	NA	NA	NA	NA	5.8
GLS	33955	2014	1	1	1	105	26	1	16	NC304xOh7B	DRIL68.072	NA	6.5	5.5	NA	NA	NA	NA	6
GLS	33956	2014	1	1	1	105	25	1	17	NC304xOh7B	DRIL68.094	NA	6	4	NA	NA	NA	NA	5
GLS	33957	2014	1	1	2	105	24	1	18	NC304xOh7B	DRIL68.018	NA	6.5	5	NA	NA	NA	NA	5.8
GLS	33959	2014	1	1	2	105	22	1	20	NC304xOh7B	DRIL68.099	NA	6	5	NA	NA	NA	NA	5.5
GLS	33960	2014	1	1	2	105	21	1	21	NC304xOh7B	DRIL68.078	NA	6.5	5	NA	NA	NA	NA	5.8
GLS	33961	2014	1	1	2	105	20	1	22	NC304xOh7B	DRIL68.096	NA	7	5	NA	NA	NA	NA	6
GLS	33963	2014	1	1	2	105	18	1	24	NC304xOh7B	DRIL68.032	NA	6.5	4.5	NA	NA	NA	NA	5.5
GLS	33966	2014	1	1	2	105	15	1	27	NC304xOh7B	DRIL68.026	NA	7	5	NA	NA	NA	NA	6
GLS	33967	2014	1	1	2	105	14	1	28	NC304xOh7B	DRIL68.060	NA	7	6	NA	NA	NA	NA	6.5
GLS	33968	2014	1	1	2	105	13	1	29	NC304xOh7B	DRIL68.067	NA	7	5.5	NA	NA	NA	NA	6.3
GLS	33969	2014	1	1	2	105	12	1	30	NC304xOh7B	DRIL68.105	NA	7	5	NA	NA	NA	NA	6
GLS	33970	2014	1	1	2	105	11	1	31	NC304xOh7B	DRIL68.104	NA	6.5	5	NA	NA	NA	NA	5.8
GLS	33971	2014	1	1	2	105	10	1	32	NC304xOh7B	DRIL68.010	NA	8	7.5	NA	NA	NA	NA	7.8
GLS	33972	2014	1	1	2	105	9	1	33	NC304xOh7B	DRIL68.090	NA	7	5	NA	NA	NA	NA	6
GLS	33973	2014	1	1	2	105	8	1	34	NC304xOh7B	DRIL68.091	NA	7.5	7	NA	NA	NA	NA	7.3
GLS	33974	2014	1	1	3	105	7	1	35	NC304xOh7B	DRIL68.127	NA	7.5	6.5	NA	NA	NA	NA	7
GLS	33976	2014	1	1	3	105	5	1	37	NC304xOh7B	DRIL68.095	NA	7.5	6.5	NA	NA	NA	NA	7
GLS	33977	2014	1	1	3	106	5	1	38	NC304xOh7B	DRIL68.083	NA	7.5	5	NA	NA	NA	NA	6.3
GLS	33978	2014	1	1	3	106	6	1	39	NC304xOh7B	DRIL68.008	NA	7	6	NA	NA	NA	NA	6.5
GLS	33979	2014	1	1	3	106	7	1	40	NC304xOh7B	DRIL68.035	NA	7.5	5	NA	NA	NA	NA	6.3
GLS	33981	2014	1	1	3	106	9	1	42	NC304xOh7B	DRIL68.042	NA	7.5	6.5	NA	NA	NA	NA	7
GLS	33983	2014	1	1	3	106	11	1	44	NC304xOh7B	DRIL68.004	NA	7	5	NA	NA	NA	NA	6
GLS	33984	2014	1	1	3	106	12	1	45	NC304xOh7B	DRIL68.118	NA	7.5	7.5	NA	NA	NA	NA	7.5
GLS	33985	2014	1	1	3	106	13	1	46	NC304xOh7B	DRIL68.089	NA	7	6	NA	NA	NA	NA	6.5
GLS	33986	2014	1	1	3	106	14	1	47	NC304xOh7B	DRIL68.055	NA	7.5	6	NA	NA	NA	NA	6.8
GLS	33988	2014	1	1	3	106	16	1	49	NC304xOh7B	DRIL68.103	NA	7	5	NA	NA	NA	NA	6
GLS	33990	2014	1	1	3	106	18	1	51	NC304xOh7B	DRIL68.024	NA	7	4.5	NA	NA	NA	NA	5.8
GLS	33991	2014	1	1	4	106	19	1	52	NC304xOh7B	DRIL68.108	NA	7.5	5.5	NA	NA	NA	NA	6.5
GLS	33992	2014	1	1	4	106	20	1	53	NC304xOh7B	DRIL68.070	NA	7	5	NA	NA	NA	NA	6
GLS	33993	2014	1	1	4	106	21	1	54	NC304xOh7B	DRIL68.101	NA	6.5	4	NA	NA	NA	NA	5.3
GLS	33994	2014	1	1	4	106	22	1	55	NC304xOh7B	DRIL68.076	NA	6.5	5	NA	NA	NA	NA	5.8
GLS	33995	2014	1	1	4	106	23	1	56	NC304xOh7B	DRIL68.005	NA	7	6	NA	NA	NA	NA	6.5
GLS	33998	2014	1	1	4	106	26	1	59	NC304xOh7B	DRIL68.034	NA	7	5	NA	NA	NA	NA	6
GLS	33999	2014	1	1	4	106	27	1	60	NC304xOh7B	DRIL68.061	NA	6.5	5	NA	NA	NA	NA	5.8
GLS	34000	2014	1	1	4	106	28	1	61	NC304xOh7B	DRIL68.012	NA	7	5.5	NA	NA	NA	NA	6.3
GLS	34001	2014	1	1	4	106	29	1	62	NC304xOh7B	DRIL68.047	NA	6.5	4.5	NA	NA	NA	NA	5.5
GLS	34002	2014	1	1	4	106	30	1	63	NC304xOh7B	DRIL68.054	NA	6.5	6.5	NA	NA	NA	NA	6.5
GLS	34004	2014	1	1	4	106	32	1	65	NC304xOh7B	DRIL68.073	NA	6.5	5	NA	NA	NA	NA	5.8
GLS	34005	2014	1	1	4	106	33	1	66	NC304xOh7B	DRIL68.068	NA	7	5.5	NA	NA	NA	NA	6.3
GLS	34006	2014	1	1	4	106	34	1	67	NC304xOh7B	DRIL68.056	NA	7	4.5	NA	NA	NA	NA	5.8
GLS	34007	2014	1	1	4	106	35	1	68	NC304xOh7B	DRIL68.052	NA	6.5	5	NA	NA	NA	NA	5.8
GLS	34008	2014	1	1	5	106	36	1	69	NC304xOh7B	DRIL68.033	NA	6.5	5	NA	NA	NA	NA	5.8
GLS	34009	2014	1	1	5	106	37	1	70	NC304xOh7B	DRIL68.027	NA	7.5	6.5	NA	NA	NA	NA	7
GLS	34011	2014	1	1	5	106	39	1	72	NC304xOh7B	DRIL68.016	NA	7	5	NA	NA	NA	NA	6
GLS	34012	2014	1	1	5	106	40	1	73	NC304xOh7B	DRIL68.115	NA	6	3	NA	NA	NA	NA	4.5
GLS	34013	2014	1	1	5	106	41	1	74	NC304xOh7B	DRIL68.043	NA	6.5	4	NA	NA	NA	NA	5.3
GLS	34016	2014	1	1	5	106	44	1	77	NC304xOh7B	DRIL68.003	NA	7.5	6	NA	NA	NA	NA	6.8
GLS	34018	2014	1	1	5	106	46	1	79	NC304xOh7B	DRIL68.017	NA	7	k5	NA	NA	NA	NA	NA
GLS	34019	2014	1	1	5	106	47	1	80	NC304xOh7B	DRIL68.039	NA	7.5	6	NA	NA	NA	NA	6.8
GLS	34020	2014	1	1	5	106	48	1	81	NC304xOh7B	DRIL68.097	NA	6.5	3	NA	NA	NA	NA	4.8
GLS	34022	2014	1	1	5	106	50	1	83	NC304xOh7B	DRIL68.022	NA	7	6	NA	NA	NA	NA	6.5
GLS	34024	2014	1	1	5	106	52	1	85	NC304xOh7B	DRIL68.030	NA	7.5	6.5	NA	NA	NA	NA	7
GLS	34025	2014	1	1	6	106	53	1	86	NC304xOh7B	DRIL68.125	NA	7	6	NA	NA	NA	NA	6.5
GLS	34027	2014	1	1	6	106	55	1	88	NC304xOh7B	DRIL68.112	NA	7.5	7	NA	NA	NA	NA	7.3
GLS	34028	2014	1	1	6	106	56	1	89	NC304xOh7B	DRIL68.025	NA	7.5	6	NA	NA	NA	NA	6.8
GLS	34029	2014	1	1	6	106	57	1	90	NC304xOh7B	DRIL68.080	NA	7	5	NA	NA	NA	NA	6
GLS	34031	2014	1	1	6	106	59	1	92	NC304xOh7B	DRIL68.015	NA	7	6	NA	NA	NA	NA	6.5
GLS	34032	2014	1	1	6	106	60	1	93	NC304xOh7B	DRIL68.051	NA	6	5	NA	NA	NA	NA	5.5
GLS	34033	2014	1	1	6	107	60	1	94	NC304xOh7B	DRIL68.028	NA	7	5	NA	NA	NA	NA	6
GLS	34035	2014	1	1	6	107	58	1	96	NC304xOh7B	DRIL68.114	NA	6.5	5	NA	NA	NA	NA	5.8
GLS	34036	2014	1	1	6	107	57	1	97	NC304xOh7B	DRIL68.041	NA	6.5	5	NA	NA	NA	NA	5.8
GLS	34037	2014	1	1	6	107	56	1	98	NC304xOh7B	DRIL68.037	NA	7	5	NA	NA	NA	NA	6
GLS	34038	2014	1	1	6	107	55	1	99	NC304xOh7B	DRIL68.102	NA	7	6	NA	NA	NA	NA	6.5
GLS	34042	2014	1	1	7	107	51	1	103	NC304xOh7B	DRIL68.086	NA	7	5	NA	NA	NA	NA	6
GLS	34043	2014	1	1	7	107	50	1	104	NC304xOh7B	DRIL68.123	NA	7	6.5	NA	NA	NA	NA	6.8
GLS	34044	2014	1	1	7	107	49	1	105	NC304xOh7B	DRIL68.082	NA	6.5	5	NA	NA	NA	NA	5.8
GLS	34047	2014	1	1	7	107	46	1	108	NC304xOh7B	DRIL68.106	NA	7	7	NA	NA	NA	NA	7
GLS	34048	2014	1	1	7	107	45	1	109	NC304xOh7B	DRIL68.075	NA	7	5	NA	NA	NA	NA	6
GLS	34049	2014	1	1	7	107	44	1	110	NC304xOh7B	DRIL68.084	NA	7	5	NA	NA	NA	NA	6
GLS	34050	2014	1	1	7	107	43	1	111	NC304xOh7B	DRIL68.038	NA	7	6	NA	NA	NA	NA	6.5
GLS	34051	2014	1	1	7	107	42	1	112	NC304xOh7B	DRIL68.085	NA	6.5	4.5	NA	NA	NA	NA	5.5
GLS	34052	2014	1	1	7	107	41	1	113	NC304xOh7B	DRIL68.007	NA	7	5.5	NA	NA	NA	NA	6.3
GLS	34054	2014	1	1	7	107	39	1	115	NC304xOh7B	DRIL68.064	NA	7	5	NA	NA	NA	NA	6
GLS	34055	2014	1	1	7	107	38	1	116	NC304xOh7B	DRIL68.063	NA	7	5.5	NA	NA	NA	NA	6.3
GLS	34058	2014	1	1	7	107	35	1	119	NC304xOh7B	DRIL68.036	NA	7	6	NA	NA	NA	NA	6.5
GLS	34059	2014	1	1	8	107	34	1	120	NC304xOh7B	DRIL68.053	NA	7	5	NA	NA	NA	NA	6
GLS	34061	2014	1	1	8	107	32	1	122	NC304xOh7B	DRIL68.021	NA	7	6.5	NA	NA	NA	NA	6.8
GLS	34064	2014	1	1	8	107	29	1	125	NC304xOh7B	DRIL68.049	NA	7	5	NA	NA	NA	NA	6
GLS	34066	2014	1	1	8	107	27	1	127	NC304xOh7B	DRIL68.071	NA	7.5	7	NA	NA	NA	NA	7.3
GLS	34068	2014	1	1	8	107	25	1	129	NC304xOh7B	DRIL68.077	NA	7.5	5	NA	NA	NA	NA	6.3
GLS	34070	2014	1	1	8	107	23	1	131	NC304xOh7B	DRIL68.019	NA	7	5	NA	NA	NA	NA	6
GLS	34071	2014	1	1	8	107	22	1	132	NC304xOh7B	DRIL68.014	NA	7	5	NA	NA	NA	NA	6
GLS	34072	2014	1	1	8	107	21	1	133	NC304xOh7B	DRIL68.088	NA	7.5	7	NA	NA	NA	NA	7.3
GLS	34073	2014	1	1	8	107	20	1	134	NC304xOh7B	DRIL68.100	NA	8	7	NA	NA	NA	NA	7.5
GLS	34075	2014	1	1	8	107	18	1	136	NC304xOh7B	DRIL68.117	NA	7.5	7	NA	NA	NA	NA	7.3
GLS	34076	2014	1	1	9	107	17	1	137	NC304xOh7B	DRIL68.031	NA	7.5	6.5	NA	NA	NA	NA	7
GLS	34078	2014	1	1	9	107	15	1	139	NC304xOh7B	DRIL68.046	NA	7	5.5	NA	NA	NA	NA	6.3
GLS	34079	2014	1	1	9	107	14	1	140	NC304xOh7B	DRIL68.044	NA	7	4.5	NA	NA	NA	NA	5.8
GLS	34080	2014	1	1	9	107	13	1	141	NC304xOh7B	DRIL68.109	NA	7.5	7	NA	NA	NA	NA	7.3
GLS	34081	2014	1	1	9	107	12	1	142	NC304xOh7B	DRIL68.023	NA	7.5	6	NA	NA	NA	NA	6.8
GLS	34082	2014	1	1	9	107	11	1	143	NC304xOh7B	DRIL68.002	NA	7.5	5	NA	NA	NA	NA	6.3
GLS	34084	2014	1	1	9	107	9	1	145	NC304xOh7B	DRIL68.069	NA	7.5	6	NA	NA	NA	NA	6.8
GLS	34085	2014	1	1	9	107	8	1	146	NC304xOh7B	DRIL68.029	NA	7	6.5	NA	NA	NA	NA	6.8
GLS	34087	2014	1	1	9	107	6	1	148	NC304xOh7B	DRIL68.048	NA	7	6	NA	NA	NA	NA	6.5
GLS	34090	2014	1	1	9	108	6	1	151	NC304xOh7B	DRIL68.121	NA	7	5	NA	NA	NA	NA	6
GLS	34091	2014	1	1	9	108	7	1	152	NC304xOh7B	DRIL68.098	NA	7	5	NA	NA	NA	NA	6
GLS	34092	2014	1	1	9	108	8	1	153	NC304xOh7B	DRIL68.111	NA	7	6	NA	NA	NA	NA	6.5
GLS	34656	2014	1	2	1	118	12	1	154	NC304xOh7B	DRIL68.068	NA	7.5	6	NA	NA	NA	NA	6.8
GLS	34658	2014	1	2	1	118	14	1	156	NC304xOh7B	DRIL68.005	NA	7.5	6	NA	NA	NA	NA	6.8
GLS	34659	2014	1	2	1	118	15	1	157	NC304xOh7B	DRIL68.004	NA	7	6	NA	NA	NA	NA	6.5
GLS	34660	2014	1	2	1	118	16	1	158	NC304xOh7B	DRIL68.046	NA	7	5	NA	NA	NA	NA	6
GLS	34662	2014	1	2	1	118	18	1	160	NC304xOh7B	DRIL68.119	NA	7.5	6	NA	NA	NA	NA	6.8
GLS	34663	2014	1	2	1	118	19	1	161	NC304xOh7B	DRIL68.025	NA	7	5	NA	NA	NA	NA	6
GLS	34664	2014	1	2	1	118	20	1	162	NC304xOh7B	DRIL68.121	NA	7	6	NA	NA	NA	NA	6.5
GLS	34665	2014	1	2	1	118	21	1	163	NC304xOh7B	DRIL68.087	NA	7	5	NA	NA	NA	NA	6
GLS	34666	2014	1	2	1	118	22	1	164	NC304xOh7B	DRIL68.017	NA	7	6	NA	NA	NA	NA	6.5
GLS	34667	2014	1	2	1	118	23	1	165	NC304xOh7B	DRIL68.114	NA	6.5	5	NA	NA	NA	NA	5.8
GLS	34668	2014	1	2	1	118	24	1	166	NC304xOh7B	DRIL68.008	NA	7	5	NA	NA	NA	NA	6
GLS	34669	2014	1	2	1	118	25	1	167	NC304xOh7B	DRIL68.078	NA	7	6.5	NA	NA	NA	NA	6.8
GLS	34671	2014	1	2	1	118	27	1	169	NC304xOh7B	DRIL68.043	NA	6.5	4.5	NA	NA	NA	NA	5.5
GLS	34672	2014	1	2	1	118	28	1	170	NC304xOh7B	DRIL68.100	NA	7.5	7.5	NA	NA	NA	NA	7.5
GLS	34674	2014	1	2	2	118	30	1	172	NC304xOh7B	DRIL68.010	NA	7	5.5	NA	NA	NA	NA	6.3
GLS	34675	2014	1	2	2	118	31	1	173	NC304xOh7B	DRIL68.054	NA	7.5	6	NA	NA	NA	NA	6.8
GLS	34679	2014	1	2	2	118	35	1	177	NC304xOh7B	DRIL68.098	NA	7	5	NA	NA	NA	NA	6
GLS	34681	2014	1	2	2	118	37	1	179	NC304xOh7B	DRIL68.038	NA	7	5	NA	NA	NA	NA	6
GLS	34682	2014	1	2	2	118	38	1	180	NC304xOh7B	DRIL68.123	NA	7.5	5	NA	NA	NA	NA	6.3
GLS	34683	2014	1	2	2	118	39	1	181	NC304xOh7B	DRIL68.069	NA	7	5	NA	NA	NA	NA	6
GLS	34684	2014	1	2	2	118	40	1	182	NC304xOh7B	DRIL68.047	NA	7	4.5	NA	NA	NA	NA	5.8
GLS	34687	2014	1	2	2	118	43	1	185	NC304xOh7B	DRIL68.080	NA	7	4.5	NA	NA	NA	NA	5.8
GLS	34689	2014	1	2	2	118	45	1	187	NC304xOh7B	DRIL68.060	NA	7	5	NA	NA	NA	NA	6
GLS	34693	2014	1	2	3	118	49	1	191	NC304xOh7B	DRIL68.116	NA	7	4.5	NA	NA	NA	NA	5.8
GLS	34694	2014	1	2	3	118	50	1	192	NC304xOh7B	DRIL68.111	NA	7.5	5	NA	NA	NA	NA	6.3
GLS	34695	2014	1	2	3	118	51	1	193	NC304xOh7B	DRIL68.034	NA	7	5	NA	NA	NA	NA	6
GLS	34698	2014	1	2	3	118	54	1	196	NC304xOh7B	DRIL68.022	NA	7	5	NA	NA	NA	NA	6
GLS	34701	2014	1	2	3	118	57	1	199	NC304xOh7B	DRIL68.090	NA	6.5	4.5	NA	NA	NA	NA	5.5
GLS	34702	2014	1	2	3	118	58	1	200	NC304xOh7B	DRIL68.106	NA	7	6	NA	NA	NA	NA	6.5
GLS	34703	2014	1	2	3	118	59	1	201	NC304xOh7B	DRIL68.014	NA	7.5	6	NA	NA	NA	NA	6.8
GLS	34704	2014	1	2	3	118	60	1	202	NC304xOh7B	DRIL68.118	NA	7	5.5	NA	NA	NA	NA	6.3
GLS	34705	2014	1	2	3	119	60	1	203	NC304xOh7B	DRIL68.126	NA	7	5	NA	NA	NA	NA	6
GLS	34707	2014	1	2	4	119	58	1	205	NC304xOh7B	DRIL68.007	NA	7	7	NA	NA	NA	NA	7
GLS	34708	2014	1	2	4	119	57	1	206	NC304xOh7B	DRIL68.088	NA	7.5	7	NA	NA	NA	NA	7.3
GLS	34709	2014	1	2	4	119	56	1	207	NC304xOh7B	DRIL68.094	NA	6.5	4	NA	NA	NA	NA	5.3
GLS	34711	2014	1	2	4	119	54	1	209	NC304xOh7B	DRIL68.036	NA	6.5	5	NA	NA	NA	NA	5.8
GLS	34713	2014	1	2	4	119	52	1	211	NC304xOh7B	DRIL68.015	NA	7	6	NA	NA	NA	NA	6.5
GLS	34714	2014	1	2	4	119	51	1	212	NC304xOh7B	DRIL68.074	NA	7.5	6.5	NA	NA	NA	NA	7
GLS	34715	2014	1	2	4	119	50	1	213	NC304xOh7B	DRIL68.041	NA	6.5	5	NA	NA	NA	NA	5.8
GLS	34717	2014	1	2	4	119	48	1	215	NC304xOh7B	DRIL68.067	NA	7	6	NA	NA	NA	NA	6.5
GLS	34718	2014	1	2	4	119	47	1	216	NC304xOh7B	DRIL68.073	NA	7.5	5	NA	NA	NA	NA	6.3
GLS	34720	2014	1	2	4	119	45	1	218	NC304xOh7B	DRIL68.103	NA	6.5	4.5	NA	NA	NA	NA	5.5
GLS	34721	2014	1	2	4	119	44	1	219	NC304xOh7B	DRIL68.091	NA	7.5	6.5	NA	NA	NA	NA	7
GLS	34723	2014	1	2	4	119	42	1	221	NC304xOh7B	DRIL68.035	NA	6.5	4	NA	NA	NA	NA	5.3
GLS	34724	2014	1	2	5	119	41	1	222	NC304xOh7B	DRIL68.096	NA	7	4	NA	NA	NA	NA	5.5
GLS	34725	2014	1	2	5	119	40	1	223	NC304xOh7B	DRIL68.082	NA	5.5	3.5	NA	NA	NA	NA	4.5
GLS	34726	2014	1	2	5	119	39	1	224	NC304xOh7B	DRIL68.051	NA	6.5	4.5	NA	NA	NA	NA	5.5
GLS	34729	2014	1	2	5	119	36	1	227	NC304xOh7B	DRIL68.023	NA	7.5	5.5	NA	NA	NA	NA	6.5
GLS	34730	2014	1	2	5	119	35	1	228	NC304xOh7B	DRIL68.109	NA	7	7	NA	NA	NA	NA	7
GLS	34733	2014	1	2	5	119	32	1	231	NC304xOh7B	DRIL68.039	NA	7.5	6.5	NA	NA	NA	NA	7
GLS	34734	2014	1	2	5	119	31	1	232	NC304xOh7B	DRIL68.076	NA	7	5	NA	NA	NA	NA	6
GLS	34736	2014	1	2	5	119	29	1	234	NC304xOh7B	DRIL68.092	NA	6.5	4	NA	NA	NA	NA	5.3
GLS	34738	2014	1	2	5	119	27	1	236	NC304xOh7B	DRIL68.003	NA	7	4.5	NA	NA	NA	NA	5.8
GLS	34739	2014	1	2	5	119	26	1	237	NC304xOh7B	DRIL68.062	NA	7	5	NA	NA	NA	NA	6
GLS	34740	2014	1	2	5	119	25	1	238	NC304xOh7B	DRIL68.026	NA	7.5	5	NA	NA	NA	NA	6.3
GLS	34742	2014	1	2	6	119	23	1	240	NC304xOh7B	DRIL68.049	NA	7.5	6.5	NA	NA	NA	NA	7
GLS	34743	2014	1	2	6	119	22	1	241	NC304xOh7B	DRIL68.072	NA	6.5	6	NA	NA	NA	NA	6.3
GLS	34745	2014	1	2	6	119	20	1	243	NC304xOh7B	DRIL68.084	NA	6.5	4.5	NA	NA	NA	NA	5.5
GLS	34746	2014	1	2	6	119	19	1	244	NC304xOh7B	DRIL68.105	NA	7	6	NA	NA	NA	NA	6.5
GLS	34748	2014	1	2	6	119	17	1	246	NC304xOh7B	DRIL68.042	NA	7.5	7	NA	NA	NA	NA	7.3
GLS	34749	2014	1	2	6	119	16	1	247	NC304xOh7B	DRIL68.028	NA	7	5.5	NA	NA	NA	NA	6.3
GLS	34751	2014	1	2	6	119	14	1	249	NC304xOh7B	DRIL68.033	NA	7	5.5	NA	NA	NA	NA	6.3
GLS	34752	2014	1	2	6	119	13	1	250	NC304xOh7B	DRIL68.071	NA	7	7	NA	NA	NA	NA	7
GLS	34753	2014	1	2	6	119	12	1	251	NC304xOh7B	DRIL68.061	NA	NA	NA	NA	NA	NA	NA	NA
GLS	34754	2014	1	2	6	119	11	1	252	NC304xOh7B	DRIL68.044	NA	6.5	5.5	NA	NA	NA	NA	6
GLS	34756	2014	1	2	6	119	9	1	254	NC304xOh7B	DRIL68.055	NA	7.5	7	NA	NA	NA	NA	7.3
GLS	34757	2014	1	2	6	119	8	1	255	NC304xOh7B	DRIL68.102	NA	7	4.5	NA	NA	NA	NA	5.8
GLS	34759	2014	1	2	7	119	6	1	257	NC304xOh7B	DRIL68.086	NA	6.5	5.5	NA	NA	NA	NA	6
GLS	34760	2014	1	2	7	119	5	1	258	NC304xOh7B	DRIL68.101	NA	7.5	5	NA	NA	NA	NA	6.3
GLS	34761	2014	1	2	7	120	5	1	259	NC304xOh7B	DRIL68.018	NA	7.5	5	NA	NA	NA	NA	6.3
GLS	34762	2014	1	2	7	120	6	1	260	NC304xOh7B	DRIL68.027	NA	7.5	6.5	NA	NA	NA	NA	7
GLS	34763	2014	1	2	7	120	7	1	261	NC304xOh7B	DRIL68.089	NA	7.5	6	NA	NA	NA	NA	6.8
GLS	34765	2014	1	2	7	120	9	1	263	NC304xOh7B	DRIL68.006	NA	7	6	NA	NA	NA	NA	6.5
GLS	34766	2014	1	2	7	120	10	1	264	NC304xOh7B	DRIL68.081	NA	7	6	NA	NA	NA	NA	6.5
GLS	34767	2014	1	2	7	120	11	1	265	NC304xOh7B	DRIL68.031	NA	7.5	7	NA	NA	NA	NA	7.3
GLS	34769	2014	1	2	7	120	13	1	267	NC304xOh7B	DRIL68.112	NA	7.5	7	NA	NA	NA	NA	7.3
GLS	34770	2014	1	2	7	120	14	1	268	NC304xOh7B	DRIL68.075	NA	7.5	6	NA	NA	NA	NA	6.8
GLS	34771	2014	1	2	7	120	15	1	269	NC304xOh7B	DRIL68.083	NA	7	5	NA	NA	NA	NA	6
GLS	34772	2014	1	2	7	120	16	1	270	NC304xOh7B	DRIL68.021	NA	7.5	7	NA	NA	NA	NA	7.3
GLS	34773	2014	1	2	7	120	17	1	271	NC304xOh7B	DRIL68.037	NA	7	5.5	NA	NA	NA	NA	6.3
GLS	34774	2014	1	2	7	120	18	1	272	NC304xOh7B	DRIL68.117	NA	7	6	NA	NA	NA	NA	6.5
GLS	34775	2014	1	2	8	120	19	1	273	NC304xOh7B	DRIL68.019	NA	6.5	4.5	NA	NA	NA	NA	5.5
GLS	34776	2014	1	2	8	120	20	1	274	NC304xOh7B	DRIL68.095	NA	7.5	5	NA	NA	NA	NA	6.3
GLS	34778	2014	1	2	8	120	22	1	276	NC304xOh7B	DRIL68.104	NA	7	5	NA	NA	NA	NA	6
GLS	34780	2014	1	2	8	120	24	1	278	NC304xOh7B	DRIL68.099	NA	6	4.5	NA	NA	NA	NA	5.3
GLS	34784	2014	1	2	8	120	28	1	282	NC304xOh7B	DRIL68.125	NA	7	4.5	NA	NA	NA	NA	5.8
GLS	34785	2014	1	2	8	120	29	1	283	NC304xOh7B	DRIL68.070	NA	6.5	4.5	NA	NA	NA	NA	5.5
GLS	34786	2014	1	2	8	120	30	1	284	NC304xOh7B	DRIL68.122	NA	7	5	NA	NA	NA	NA	6
GLS	34788	2014	1	2	8	120	32	1	286	NC304xOh7B	DRIL68.048	NA	7	4	NA	NA	NA	NA	5.5
GLS	34789	2014	1	2	8	120	33	1	287	NC304xOh7B	DRIL68.108	NA	7.5	6.5	NA	NA	NA	NA	7
GLS	34790	2014	1	2	8	120	34	1	288	NC304xOh7B	DRIL68.002	NA	6	4	NA	NA	NA	NA	5
GLS	34791	2014	1	2	8	120	35	1	289	NC304xOh7B	DRIL68.097	NA	6.5	4	NA	NA	NA	NA	5.3
GLS	34792	2014	1	2	9	120	36	1	290	NC304xOh7B	DRIL68.016	NA	7	5	NA	NA	NA	NA	6
GLS	34794	2014	1	2	9	120	38	1	292	NC304xOh7B	DRIL68.024	NA	6	4	NA	NA	NA	NA	5
GLS	34795	2014	1	2	9	120	39	1	293	NC304xOh7B	DRIL68.064	NA	7	5	NA	NA	NA	NA	6
GLS	34796	2014	1	2	9	120	40	1	294	NC304xOh7B	DRIL68.085	NA	6.5	5	NA	NA	NA	NA	5.8
GLS	34797	2014	1	2	9	120	41	1	295	NC304xOh7B	DRIL68.056	NA	7.5	6	NA	NA	NA	NA	6.8
GLS	34798	2014	1	2	9	120	42	1	296	NC304xOh7B	DRIL68.053	NA	6.5	5	NA	NA	NA	NA	5.8
GLS	34800	2014	1	2	9	120	44	1	298	NC304xOh7B	DRIL68.040	NA	7	5	NA	NA	NA	NA	6
GLS	34801	2014	1	2	9	120	45	1	299	NC304xOh7B	DRIL68.032	NA	6.5	4	NA	NA	NA	NA	5.3
GLS	34805	2014	1	2	9	120	49	1	303	NC304xOh7B	DRIL68.127	NA	7	6	NA	NA	NA	NA	6.5
GLS	34807	2014	1	2	9	120	51	1	305	NC304xOh7B	DRIL68.077	NA	7	5	NA	NA	NA	NA	6
GLS	34808	2014	1	2	9	120	52	1	306	NC304xOh7B	DRIL68.115	NA	7	5	NA	NA	NA	NA	6
GLS	50269	2015	1	1	1	10	4	1	1	NC304xOh7B	DRIL68.118	NA	8	7.5	NA	NA	NA	NA	7.8
GLS	50270	2015	1	1	1	10	5	1	2	NC304xOh7B	DRIL68.103	NA	7.5	6	NA	NA	NA	NA	6.8
GLS	50272	2015	1	1	1	10	7	1	4	NC304xOh7B	DRIL68.064	NA	7	6.5	NA	NA	NA	NA	6.8
GLS	50276	2015	1	1	1	10	11	1	8	NC304xOh7B	DRIL68.076	NA	7	5.5	NA	NA	NA	NA	6.3
GLS	50277	2015	1	1	1	10	12	1	9	NC304xOh7B	DRIL68.094	NA	7	5	NA	NA	NA	NA	6
GLS	50278	2015	1	1	1	10	13	1	10	NC304xOh7B	DRIL68.069	NA	7.5	5	NA	NA	NA	NA	6.3
GLS	50281	2015	1	1	1	10	16	1	13	NC304xOh7B	DRIL68.063	NA	NA	NA	NA	NA	NA	NA	NA
GLS	50282	2015	1	1	1	10	17	1	14	NC304xOh7B	DRIL68.019	NA	7	5	NA	NA	NA	NA	6
GLS	50283	2015	1	1	1	10	18	1	15	NC304xOh7B	DRIL68.075	NA	7.5	7	NA	NA	NA	NA	7.3
GLS	50284	2015	1	1	1	10	19	1	16	NC304xOh7B	DRIL68.095	NA	7.5	6	NA	NA	NA	NA	6.8
GLS	50286	2015	1	1	2	10	21	1	18	NC304xOh7B	DRIL68.060	NA	7	5.5	NA	NA	NA	NA	6.3
GLS	50287	2015	1	1	2	10	22	1	19	NC304xOh7B	DRIL68.004	NA	7	5.5	NA	NA	NA	NA	6.3
GLS	50288	2015	1	1	2	10	23	1	20	NC304xOh7B	DRIL68.114	NA	7.5	6	NA	NA	NA	NA	6.8
GLS	50290	2015	1	1	2	10	25	1	22	NC304xOh7B	DRIL68.105	NA	6.5	3.5	NA	NA	NA	NA	5
GLS	50293	2015	1	1	2	10	28	1	25	NC304xOh7B	DRIL68.052	NA	6	4	NA	NA	NA	NA	5
GLS	50294	2015	1	1	2	10	29	1	26	NC304xOh7B	DRIL68.077	NA	7	4.5	NA	NA	NA	NA	5.8
GLS	50295	2015	1	1	2	10	30	1	27	NC304xOh7B	DRIL68.104	NA	7	5	NA	NA	NA	NA	6
GLS	50296	2015	1	1	2	10	31	1	28	NC304xOh7B	DRIL68.021	NA	8	7	NA	NA	NA	NA	7.5
GLS	50297	2015	1	1	2	10	32	1	29	NC304xOh7B	DRIL68.101	NA	8.5	7	NA	NA	NA	NA	7.8
GLS	50298	2015	1	1	2	10	33	1	30	NC304xOh7B	DRIL68.042	NA	7.5	7	NA	NA	NA	NA	7.3
GLS	50301	2015	1	1	2	11	33	1	33	NC304xOh7B	DRIL68.044	NA	6.5	4	NA	NA	NA	NA	5.3
GLS	50302	2015	1	1	2	11	32	1	34	NC304xOh7B	DRIL68.092	NA	7	4	NA	NA	NA	NA	5.5
GLS	50303	2015	1	1	3	11	31	1	35	NC304xOh7B	DRIL68.109	NA	7.5	6.5	NA	NA	NA	NA	7
GLS	50304	2015	1	1	3	11	30	1	36	NC304xOh7B	DRIL68.099	NA	6.5	4	NA	NA	NA	NA	5.3
GLS	50305	2015	1	1	3	11	29	1	37	NC304xOh7B	DRIL68.033	NA	7	5.5	NA	NA	NA	NA	6.3
GLS	50306	2015	1	1	3	11	28	1	38	NC304xOh7B	DRIL68.123	NA	7	5.5	NA	NA	NA	NA	6.3
GLS	50308	2015	1	1	3	11	26	1	40	NC304xOh7B	DRIL68.088	NA	8	7.5	NA	NA	NA	NA	7.8
GLS	50309	2015	1	1	3	11	25	1	41	NC304xOh7B	DRIL68.083	NA	7	4	NA	NA	NA	NA	5.5
GLS	50311	2015	1	1	3	11	23	1	43	NC304xOh7B	DRIL68.012	NA	8	7.5	NA	NA	NA	NA	7.8
GLS	50313	2015	1	1	3	11	21	1	45	NC304xOh7B	DRIL68.008	NA	6.5	4	NA	NA	NA	NA	5.3
GLS	50314	2015	1	1	3	11	20	1	46	NC304xOh7B	DRIL68.090	NA	6	3	NA	NA	NA	NA	4.5
GLS	50315	2015	1	1	3	11	19	1	47	NC304xOh7B	DRIL68.043	NA	7.5	6	NA	NA	NA	NA	6.8
GLS	50316	2015	1	1	3	11	18	1	48	NC304xOh7B	DRIL68.115	NA	7.5	6.5	NA	NA	NA	NA	7
GLS	50319	2015	1	1	3	11	15	1	51	NC304xOh7B	DRIL68.037	NA	7	5.5	NA	NA	NA	NA	6.3
GLS	50320	2015	1	1	4	11	14	1	52	NC304xOh7B	DRIL68.018	NA	6.5	4	NA	NA	NA	NA	5.3
GLS	50321	2015	1	1	4	11	13	1	53	NC304xOh7B	DRIL68.049	NA	NA	5	NA	NA	NA	NA	5
GLS	50323	2015	1	1	4	11	11	1	55	NC304xOh7B	DRIL68.007	NA	7	5	NA	NA	NA	NA	6
GLS	50325	2015	1	1	4	11	9	1	57	NC304xOh7B	DRIL68.112	NA	8	7	NA	NA	NA	NA	7.5
GLS	50326	2015	1	1	4	11	8	1	58	NC304xOh7B	DRIL68.032	NA	7	4	NA	NA	NA	NA	5.5
GLS	50327	2015	1	1	4	11	7	1	59	NC304xOh7B	DRIL68.034	NA	8	7	NA	NA	NA	NA	7.5
GLS	50328	2015	1	1	4	11	6	1	60	NC304xOh7B	DRIL68.068	NA	7.5	7	NA	NA	NA	NA	7.3
GLS	50329	2015	1	1	4	11	5	1	61	NC304xOh7B	DRIL68.026	NA	7.5	6	NA	NA	NA	NA	6.8
GLS	50330	2015	1	1	4	11	4	1	62	NC304xOh7B	DRIL68.121	NA	7	5.5	NA	NA	NA	NA	6.3
GLS	50331	2015	1	1	4	11	3	1	63	NC304xOh7B	DRIL68.108	NA	7.5	5.5	NA	NA	NA	NA	6.5
GLS	50333	2015	1	1	4	11	1	1	65	NC304xOh7B	DRIL68.010	NA	8	6.5	NA	NA	NA	NA	7.3
GLS	50334	2015	1	1	4	12	1	1	66	NC304xOh7B	DRIL68.084	NA	7	6	NA	NA	NA	NA	6.5
GLS	50336	2015	1	1	4	12	3	1	68	NC304xOh7B	DRIL68.014	NA	8	7	NA	NA	NA	NA	7.5
GLS	50337	2015	1	1	5	12	4	1	69	NC304xOh7B	DRIL68.096	NA	7	5	NA	NA	NA	NA	6
GLS	50338	2015	1	1	5	12	5	1	70	NC304xOh7B	DRIL68.047	NA	7	4	NA	NA	NA	NA	5.5
GLS	50339	2015	1	1	5	12	6	1	71	NC304xOh7B	DRIL68.003	NA	7.5	5	NA	NA	NA	NA	6.3
GLS	50340	2015	1	1	5	12	7	1	72	NC304xOh7B	DRIL68.091	NA	8	7	NA	NA	NA	NA	7.5
GLS	50341	2015	1	1	5	12	8	1	73	NC304xOh7B	DRIL68.040	NA	7.5	6.5	NA	NA	NA	NA	7
GLS	50343	2015	1	1	5	12	10	1	75	NC304xOh7B	DRIL68.036	NA	7.5	6	NA	NA	NA	NA	6.8
GLS	50344	2015	1	1	5	12	11	1	76	NC304xOh7B	DRIL68.017	NA	7	6	NA	NA	NA	NA	6.5
GLS	50345	2015	1	1	5	12	12	1	77	NC304xOh7B	DRIL68.053	NA	7	5.5	NA	NA	NA	NA	6.3
GLS	50348	2015	1	1	5	12	15	1	80	NC304xOh7B	DRIL68.106	NA	8	7.5	NA	NA	NA	NA	7.8
GLS	50349	2015	1	1	5	12	16	1	81	NC304xOh7B	DRIL68.087	NA	7	5.5	NA	NA	NA	NA	6.3
GLS	50350	2015	1	1	5	12	17	1	82	NC304xOh7B	DRIL68.048	NA	7	5.5	NA	NA	NA	NA	6.3
GLS	50351	2015	1	1	5	12	18	1	83	NC304xOh7B	DRIL68.022	NA	8	7	NA	NA	NA	NA	7.5
GLS	50353	2015	1	1	5	12	20	1	85	NC304xOh7B	DRIL68.098	NA	5	3	NA	NA	NA	NA	4
GLS	50354	2015	1	1	6	12	21	1	86	NC304xOh7B	DRIL68.117	NA	7.5	6.5	NA	NA	NA	NA	7
GLS	50355	2015	1	1	6	12	22	1	87	NC304xOh7B	DRIL68.067	NA	5	3	NA	NA	NA	NA	4
GLS	50357	2015	1	1	6	12	24	1	89	NC304xOh7B	DRIL68.054	NA	8	7	NA	NA	NA	NA	7.5
GLS	50358	2015	1	1	6	12	25	1	90	NC304xOh7B	DRIL68.039	NA	8	7	NA	NA	NA	NA	7.5
GLS	50359	2015	1	1	6	12	26	1	91	NC304xOh7B	DRIL68.119	NA	7	5	NA	NA	NA	NA	6
GLS	50360	2015	1	1	6	12	27	1	92	NC304xOh7B	DRIL68.078	NA	7	5	NA	NA	NA	NA	6
GLS	50362	2015	1	1	6	12	29	1	94	NC304xOh7B	DRIL68.030	NA	7	5	NA	NA	NA	NA	6
GLS	50366	2015	1	1	6	12	33	1	98	NC304xOh7B	DRIL68.082	NA	7.5	6.5	NA	NA	NA	NA	7
GLS	50367	2015	1	1	6	12	34	1	99	NC304xOh7B	DRIL68.074	NA	8	7	NA	NA	NA	NA	7.5
GLS	50368	2015	1	1	6	13	34	1	100	NC304xOh7B	DRIL68.046	NA	7	5	NA	NA	NA	NA	6
GLS	50369	2015	1	1	6	13	33	1	101	NC304xOh7B	DRIL68.125	NA	5	3	NA	NA	NA	NA	4
GLS	50371	2015	1	1	7	13	31	1	103	NC304xOh7B	DRIL68.015	NA	6.5	4	NA	NA	NA	NA	5.3
GLS	50373	2015	1	1	7	13	29	1	105	NC304xOh7B	DRIL68.122	NA	8	7	NA	NA	NA	NA	7.5
GLS	50374	2015	1	1	7	13	28	1	106	NC304xOh7B	DRIL68.116	NA	7	4.5	NA	NA	NA	NA	5.8
GLS	50375	2015	1	1	7	13	27	1	107	NC304xOh7B	DRIL68.062	NA	7	4.5	NA	NA	NA	NA	5.8
GLS	50377	2015	1	1	7	13	25	1	109	NC304xOh7B	DRIL68.056	NA	8	7.5	NA	NA	NA	NA	7.8
GLS	50378	2015	1	1	7	13	24	1	110	NC304xOh7B	DRIL68.016	NA	6.5	5	NA	NA	NA	NA	5.8
GLS	50379	2015	1	1	7	13	23	1	111	NC304xOh7B	DRIL68.126	NA	6	4	NA	NA	NA	NA	5
GLS	50380	2015	1	1	7	13	22	1	112	NC304xOh7B	DRIL68.055	NA	8	7	NA	NA	NA	NA	7.5
GLS	50382	2015	1	1	7	13	20	1	114	NC304xOh7B	DRIL68.080	NA	6.5	4	NA	NA	NA	NA	5.3
GLS	50383	2015	1	1	7	13	19	1	115	NC304xOh7B	DRIL68.051	NA	6	4	NA	NA	NA	NA	5
GLS	50385	2015	1	1	7	13	17	1	117	NC304xOh7B	DRIL68.072	NA	7.5	7	NA	NA	NA	NA	7.3
GLS	50387	2015	1	1	7	13	15	1	119	NC304xOh7B	DRIL68.041	NA	7	5	NA	NA	NA	NA	6
GLS	50388	2015	1	1	8	13	14	1	120	NC304xOh7B	DRIL68.023	NA	7	4.5	NA	NA	NA	NA	5.8
GLS	50389	2015	1	1	8	13	13	1	121	NC304xOh7B	DRIL68.081	NA	8	7	NA	NA	NA	NA	7.5
GLS	50390	2015	1	1	8	13	12	1	122	NC304xOh7B	DRIL68.035	NA	NA	NA	NA	NA	NA	NA	NA
GLS	50392	2015	1	1	8	13	10	1	124	NC304xOh7B	DRIL68.089	NA	8	7.5	NA	NA	NA	NA	7.8
GLS	50394	2015	1	1	8	13	8	1	126	NC304xOh7B	DRIL68.086	NA	7	5.5	NA	NA	NA	NA	6.3
GLS	50397	2015	1	1	8	13	5	1	129	NC304xOh7B	DRIL68.073	NA	7.5	6	NA	NA	NA	NA	6.8
GLS	50398	2015	1	1	8	13	4	1	130	NC304xOh7B	DRIL68.097	NA	7	4	NA	NA	NA	NA	5.5
GLS	50399	2015	1	1	8	13	3	1	131	NC304xOh7B	DRIL68.111	NA	7.5	7	NA	NA	NA	NA	7.3
GLS	50400	2015	1	1	8	13	2	1	132	NC304xOh7B	DRIL68.100	NA	7	6	NA	NA	NA	NA	6.5
GLS	50401	2015	1	1	8	13	1	1	133	NC304xOh7B	DRIL68.002	NA	7.5	6	NA	NA	NA	NA	6.8
GLS	50402	2015	1	1	8	14	1	1	134	NC304xOh7B	DRIL68.061	NA	NA	NA	NA	NA	NA	NA	NA
GLS	50404	2015	1	1	8	14	3	1	136	NC304xOh7B	DRIL68.027	NA	7	5.5	NA	NA	NA	NA	6.3
GLS	50405	2015	1	1	9	14	4	1	137	NC304xOh7B	DRIL68.071	NA	8	7	NA	NA	NA	NA	7.5
GLS	50406	2015	1	1	9	14	5	1	138	NC304xOh7B	DRIL68.006	NA	7.5	6.5	NA	NA	NA	NA	7
GLS	50408	2015	1	1	9	14	7	1	140	NC304xOh7B	DRIL68.028	NA	7	6	NA	NA	NA	NA	6.5
GLS	50409	2015	1	1	9	14	8	1	141	NC304xOh7B	DRIL68.024	NA	7.5	7	NA	NA	NA	NA	7.3
GLS	50410	2015	1	1	9	14	9	1	142	NC304xOh7B	DRIL68.085	NA	7.5	6	NA	NA	NA	NA	6.8
GLS	50411	2015	1	1	9	14	10	1	143	NC304xOh7B	DRIL68.038	NA	7.5	6	NA	NA	NA	NA	6.8
GLS	50412	2015	1	1	9	14	11	1	144	NC304xOh7B	DRIL68.031	NA	7.5	6	NA	NA	NA	NA	6.8
GLS	50414	2015	1	1	9	14	13	1	146	NC304xOh7B	DRIL68.025	NA	7.5	6.5	NA	NA	NA	NA	7
GLS	50415	2015	1	1	9	14	14	1	147	NC304xOh7B	DRIL68.127	NA	7.5	6.5	NA	NA	NA	NA	7
GLS	50416	2015	1	1	9	14	15	1	148	NC304xOh7B	DRIL68.102	NA	7	5	NA	NA	NA	NA	6
GLS	50418	2015	1	1	9	14	17	1	150	NC304xOh7B	DRIL68.029	NA	7.5	7	NA	NA	NA	NA	7.3
GLS	50420	2015	1	1	9	14	19	1	152	NC304xOh7B	DRIL68.005	NA	7.5	5	NA	NA	NA	NA	6.3
GLS	50421	2015	1	1	9	14	20	1	153	NC304xOh7B	DRIL68.070	NA	7	5.5	NA	NA	NA	NA	6.3
GLS	52138	2015	1	2	1	65	30	1	155	NC304xOh7B	DRIL68.115	NA	7	5	NA	NA	NA	NA	6
GLS	52139	2015	1	2	1	65	31	1	156	NC304xOh7B	DRIL68.126	NA	7	4	NA	NA	NA	NA	5.5
GLS	52140	2015	1	2	1	65	32	1	157	NC304xOh7B	DRIL68.033	NA	7	5	NA	NA	NA	NA	6
GLS	52142	2015	1	2	1	65	34	1	159	NC304xOh7B	DRIL68.005	NA	7.5	6	NA	NA	NA	NA	6.8
GLS	52143	2015	1	2	1	66	34	1	160	NC304xOh7B	DRIL68.091	NA	8	7.5	NA	NA	NA	NA	7.8
GLS	52144	2015	1	2	1	66	33	1	161	NC304xOh7B	DRIL68.098	NA	5.5	3	NA	NA	NA	NA	4.3
GLS	52145	2015	1	2	1	66	32	1	162	NC304xOh7B	DRIL68.095	NA	7	5.5	NA	NA	NA	NA	6.3
GLS	52146	2015	1	2	1	66	31	1	163	NC304xOh7B	DRIL68.018	NA	6.5	5	NA	NA	NA	NA	5.8
GLS	52148	2015	1	2	1	66	29	1	165	NC304xOh7B	DRIL68.004	NA	6.5	5	NA	NA	NA	NA	5.8
GLS	52150	2015	1	2	1	66	27	1	167	NC304xOh7B	DRIL68.056	NA	NA	NA	NA	NA	NA	NA	NA
GLS	52151	2015	1	2	1	66	26	1	168	NC304xOh7B	DRIL68.075	NA	7.5	6	NA	NA	NA	NA	6.8
GLS	52153	2015	1	2	1	66	24	1	170	NC304xOh7B	DRIL68.026	NA	7	5	NA	NA	NA	NA	6
GLS	52154	2015	1	2	2	66	23	1	171	NC304xOh7B	DRIL68.087	NA	6	2	NA	NA	NA	NA	4
GLS	52156	2015	1	2	2	66	21	1	173	NC304xOh7B	DRIL68.031	NA	6.5	3	NA	NA	NA	NA	4.8
GLS	52157	2015	1	2	2	66	20	1	174	NC304xOh7B	DRIL68.016	NA	6.5	4	NA	NA	NA	NA	5.3
GLS	52158	2015	1	2	2	66	19	1	175	NC304xOh7B	DRIL68.027	NA	7.5	6	NA	NA	NA	NA	6.8
GLS	52160	2015	1	2	2	66	17	1	177	NC304xOh7B	DRIL68.081	NA	8	7.5	NA	NA	NA	NA	7.8
GLS	52162	2015	1	2	2	66	15	1	179	NC304xOh7B	DRIL68.043	NA	7	4	NA	NA	NA	NA	5.5
GLS	52163	2015	1	2	2	66	14	1	180	NC304xOh7B	DRIL68.044	NA	7	5.5	NA	NA	NA	NA	6.3
GLS	52164	2015	1	2	2	66	13	1	181	NC304xOh7B	DRIL68.014	NA	7.5	7	NA	NA	NA	NA	7.3
GLS	52166	2015	1	2	2	66	11	1	183	NC304xOh7B	DRIL68.117	NA	NA	NA	NA	NA	NA	NA	NA
GLS	52167	2015	1	2	2	66	10	1	184	NC304xOh7B	DRIL68.067	NA	6.5	4	NA	NA	NA	NA	5.3
GLS	52169	2015	1	2	2	66	8	1	186	NC304xOh7B	DRIL68.123	NA	7	3	NA	NA	NA	NA	5
GLS	52172	2015	1	2	3	66	5	1	189	NC304xOh7B	DRIL68.035	NA	NA	NA	NA	NA	NA	NA	NA
GLS	52175	2015	1	2	3	66	2	1	192	NC304xOh7B	DRIL68.038	NA	7	6.5	NA	NA	NA	NA	6.8
GLS	52176	2015	1	2	3	66	1	1	193	NC304xOh7B	DRIL68.082	NA	NA	NA	NA	NA	NA	NA	NA
GLS	52177	2015	1	2	3	67	1	1	194	NC304xOh7B	DRIL68.101	NA	NA	NA	NA	NA	NA	NA	NA
GLS	52178	2015	1	2	3	67	2	1	195	NC304xOh7B	DRIL68.049	NA	NA	NA	NA	NA	NA	NA	NA
GLS	52181	2015	1	2	3	67	5	1	198	NC304xOh7B	DRIL68.083	NA	NA	NA	NA	NA	NA	NA	NA
GLS	52182	2015	1	2	3	67	6	1	199	NC304xOh7B	DRIL68.072	NA	NA	NA	NA	NA	NA	NA	NA
GLS	52183	2015	1	2	3	67	7	1	200	NC304xOh7B	DRIL68.109	NA	7.5	6.5	NA	NA	NA	NA	7
GLS	52185	2015	1	2	3	67	9	1	202	NC304xOh7B	DRIL68.100	NA	7	6.5	NA	NA	NA	NA	6.8
GLS	52186	2015	1	2	3	67	10	1	203	NC304xOh7B	DRIL68.078	NA	6.5	5	NA	NA	NA	NA	5.8
GLS	52188	2015	1	2	4	67	12	1	205	NC304xOh7B	DRIL68.112	NA	NA	NA	NA	NA	NA	NA	NA
GLS	52189	2015	1	2	4	67	13	1	206	NC304xOh7B	DRIL68.042	NA	7.5	6.5	NA	NA	NA	NA	7
GLS	52191	2015	1	2	4	67	15	1	208	NC304xOh7B	DRIL68.122	NA	7.5	7	NA	NA	NA	NA	7.3
GLS	52192	2015	1	2	4	67	16	1	209	NC304xOh7B	DRIL68.030	NA	NA	NA	NA	NA	NA	NA	NA
GLS	52193	2015	1	2	4	67	17	1	210	NC304xOh7B	DRIL68.089	NA	7.5	7	NA	NA	NA	NA	7.3
GLS	52194	2015	1	2	4	67	18	1	211	NC304xOh7B	DRIL68.017	NA	NA	NA	NA	NA	NA	NA	NA
GLS	52195	2015	1	2	4	67	19	1	212	NC304xOh7B	DRIL68.121	NA	7	5	NA	NA	NA	NA	6
GLS	52196	2015	1	2	4	67	20	1	213	NC304xOh7B	DRIL68.015	NA	7	5	NA	NA	NA	NA	6
GLS	52197	2015	1	2	4	67	21	1	214	NC304xOh7B	DRIL68.028	NA	7	5	NA	NA	NA	NA	6
GLS	52199	2015	1	2	4	67	23	1	216	NC304xOh7B	DRIL68.086	NA	6.5	5	NA	NA	NA	NA	5.8
GLS	52200	2015	1	2	4	67	24	1	217	NC304xOh7B	DRIL68.104	NA	7	4.5	NA	NA	NA	NA	5.8
GLS	52201	2015	1	2	4	67	25	1	218	NC304xOh7B	DRIL68.022	NA	5	7	NA	NA	NA	NA	6
GLS	52202	2015	1	2	4	67	26	1	219	NC304xOh7B	DRIL68.063	NA	NA	NA	NA	NA	NA	NA	NA
GLS	52203	2015	1	2	4	67	27	1	220	NC304xOh7B	DRIL68.099	NA	6.5	3	NA	NA	NA	NA	4.8
GLS	52204	2015	1	2	4	67	28	1	221	NC304xOh7B	DRIL68.029	NA	NA	NA	NA	NA	NA	NA	NA
GLS	52205	2015	1	2	5	67	29	1	222	NC304xOh7B	DRIL68.041	NA	7	5	NA	NA	NA	NA	6
GLS	52206	2015	1	2	5	67	30	1	223	NC304xOh7B	DRIL68.097	NA	7	5	NA	NA	NA	NA	6
GLS	52208	2015	1	2	5	67	32	1	225	NC304xOh7B	DRIL68.002	NA	7	5	NA	NA	NA	NA	6
GLS	52209	2015	1	2	5	67	33	1	226	NC304xOh7B	DRIL68.010	NA	7.5	6.5	NA	NA	NA	NA	7
GLS	52210	2015	1	2	5	67	34	1	227	NC304xOh7B	DRIL68.102	NA	7	4.5	NA	NA	NA	NA	5.8
GLS	52212	2015	1	2	5	68	33	1	229	NC304xOh7B	DRIL68.106	NA	8	7	NA	NA	NA	NA	7.5
GLS	52213	2015	1	2	5	68	32	1	230	NC304xOh7B	DRIL68.076	NA	6.5	5	NA	NA	NA	NA	5.8
GLS	52215	2015	1	2	5	68	30	1	232	NC304xOh7B	DRIL68.114	NA	7	5.5	NA	NA	NA	NA	6.3
GLS	52216	2015	1	2	5	68	29	1	233	NC304xOh7B	DRIL68.077	NA	6	4.5	NA	NA	NA	NA	5.3
GLS	52217	2015	1	2	5	68	28	1	234	NC304xOh7B	DRIL68.108	NA	7	6	NA	NA	NA	NA	6.5
GLS	52218	2015	1	2	5	68	27	1	235	NC304xOh7B	DRIL68.046	NA	7	5	NA	NA	NA	NA	6
GLS	52220	2015	1	2	5	68	25	1	237	NC304xOh7B	DRIL68.037	NA	NA	NA	NA	NA	NA	NA	NA
GLS	52221	2015	1	2	5	68	24	1	238	NC304xOh7B	DRIL68.070	NA	7	5	NA	NA	NA	NA	6
GLS	52222	2015	1	2	6	68	23	1	239	NC304xOh7B	DRIL68.064	NA	7	5	NA	NA	NA	NA	6
GLS	52223	2015	1	2	6	68	22	1	240	NC304xOh7B	DRIL68.008	NA	7	5	NA	NA	NA	NA	6
GLS	52224	2015	1	2	6	68	21	1	241	NC304xOh7B	DRIL68.111	NA	NA	NA	NA	NA	NA	NA	NA
GLS	52225	2015	1	2	6	68	20	1	242	NC304xOh7B	DRIL68.062	NA	6	4	NA	NA	NA	NA	5
GLS	52228	2015	1	2	6	68	17	1	245	NC304xOh7B	DRIL68.003	NA	7	5.5	NA	NA	NA	NA	6.3
GLS	52230	2015	1	2	6	68	15	1	247	NC304xOh7B	DRIL68.103	NA	NA	NA	NA	NA	NA	NA	NA
GLS	52231	2015	1	2	6	68	14	1	248	NC304xOh7B	DRIL68.034	NA	NA	NA	NA	NA	NA	NA	NA
GLS	52232	2015	1	2	6	68	13	1	249	NC304xOh7B	DRIL68.039	NA	NA	NA	NA	NA	NA	NA	NA
GLS	52233	2015	1	2	6	68	12	1	250	NC304xOh7B	DRIL68.023	NA	NA	NA	NA	NA	NA	NA	NA
GLS	52234	2015	1	2	6	68	11	1	251	NC304xOh7B	DRIL68.024	NA	NA	NA	NA	NA	NA	NA	NA
GLS	52235	2015	1	2	6	68	10	1	252	NC304xOh7B	DRIL68.085	NA	NA	NA	NA	NA	NA	NA	NA
GLS	52236	2015	1	2	6	68	9	1	253	NC304xOh7B	DRIL68.052	NA	NA	NA	NA	NA	NA	NA	NA
GLS	52238	2015	1	2	6	68	7	1	255	NC304xOh7B	DRIL68.096	NA	NA	NA	NA	NA	NA	NA	NA
GLS	52240	2015	1	2	7	68	5	1	257	NC304xOh7B	DRIL68.080	NA	7	5	NA	NA	NA	NA	6
GLS	52242	2015	1	2	7	68	3	1	259	NC304xOh7B	DRIL68.092	NA	7	5	NA	NA	NA	NA	6
GLS	52243	2015	1	2	7	68	2	1	260	NC304xOh7B	DRIL68.007	NA	NA	NA	NA	NA	NA	NA	NA
GLS	52244	2015	1	2	7	68	1	1	261	NC304xOh7B	DRIL68.074	NA	NA	NA	NA	NA	NA	NA	NA
GLS	52246	2015	1	2	7	69	2	1	263	NC304xOh7B	DRIL68.069	NA	7	5	NA	NA	NA	NA	6
GLS	52247	2015	1	2	7	69	3	1	264	NC304xOh7B	DRIL68.127	NA	7	5	NA	NA	NA	NA	6
GLS	52250	2015	1	2	7	69	6	1	267	NC304xOh7B	DRIL68.012	NA	NA	NA	NA	NA	NA	NA	NA
GLS	52251	2015	1	2	7	69	7	1	268	NC304xOh7B	DRIL68.032	NA	6.5	4	NA	NA	NA	NA	5.3
GLS	52252	2015	1	2	7	69	8	1	269	NC304xOh7B	DRIL68.048	NA	7	5	NA	NA	NA	NA	6
GLS	52254	2015	1	2	7	69	10	1	271	NC304xOh7B	DRIL68.051	NA	6	2	NA	NA	NA	NA	4
GLS	52256	2015	1	2	8	69	12	1	273	NC304xOh7B	DRIL68.060	NA	6	4.5	NA	NA	NA	NA	5.3
GLS	52257	2015	1	2	8	69	13	1	274	NC304xOh7B	DRIL68.125	NA	NA	NA	NA	NA	NA	NA	NA
GLS	52258	2015	1	2	8	69	14	1	275	NC304xOh7B	DRIL68.025	NA	7.5	7	NA	NA	NA	NA	7.3
GLS	52259	2015	1	2	8	69	15	1	276	NC304xOh7B	DRIL68.094	NA	7	5	NA	NA	NA	NA	6
GLS	52260	2015	1	2	8	69	16	1	277	NC304xOh7B	DRIL68.119	NA	7	5	NA	NA	NA	NA	6
GLS	52261	2015	1	2	8	69	17	1	278	NC304xOh7B	DRIL68.053	NA	7	5	NA	NA	NA	NA	6
GLS	52263	2015	1	2	8	69	19	1	280	NC304xOh7B	DRIL68.019	NA	6.5	3.5	NA	NA	NA	NA	5
GLS	52266	2015	1	2	8	69	22	1	283	NC304xOh7B	DRIL68.055	NA	7.5	6.5	NA	NA	NA	NA	7
GLS	52267	2015	1	2	8	69	23	1	284	NC304xOh7B	DRIL68.116	NA	6.5	4	NA	NA	NA	NA	5.3
GLS	52269	2015	1	2	8	69	25	1	286	NC304xOh7B	DRIL68.071	NA	7.5	7	NA	NA	NA	NA	7.3
GLS	52270	2015	1	2	8	69	26	1	287	NC304xOh7B	DRIL68.105	NA	7	5	NA	NA	NA	NA	6
GLS	52271	2015	1	2	8	69	27	1	288	NC304xOh7B	DRIL68.068	NA	7.5	7.5	NA	NA	NA	NA	7.5
GLS	52272	2015	1	2	8	69	28	1	289	NC304xOh7B	DRIL68.036	NA	6	3	NA	NA	NA	NA	4.5
GLS	52273	2015	1	2	9	69	29	1	290	NC304xOh7B	DRIL68.047	NA	NA	NA	NA	NA	NA	NA	NA
GLS	52274	2015	1	2	9	69	30	1	291	NC304xOh7B	DRIL68.040	NA	7	6.5	NA	NA	NA	NA	6.8
GLS	52277	2015	1	2	9	69	33	1	294	NC304xOh7B	DRIL68.088	NA	8	7.5	NA	NA	NA	NA	7.8
GLS	52278	2015	1	2	9	69	34	1	295	NC304xOh7B	DRIL68.054	NA	8	7	NA	NA	NA	NA	7.5
GLS	52280	2015	1	2	9	70	33	1	297	NC304xOh7B	DRIL68.084	NA	7	5.5	NA	NA	NA	NA	6.3
GLS	52281	2015	1	2	9	70	32	1	298	NC304xOh7B	DRIL68.073	NA	7	6	NA	NA	NA	NA	6.5
GLS	52282	2015	1	2	9	70	31	1	299	NC304xOh7B	DRIL68.061	NA	7	5	NA	NA	NA	NA	6
GLS	52283	2015	1	2	9	70	30	1	300	NC304xOh7B	DRIL68.021	NA	NA	NA	NA	NA	NA	NA	NA
GLS	52284	2015	1	2	9	70	29	1	301	NC304xOh7B	DRIL68.090	NA	7	5	NA	NA	NA	NA	6
GLS	52286	2015	1	2	9	70	27	1	303	NC304xOh7B	DRIL68.118	NA	NA	NA	NA	NA	NA	NA	NA
GLS	52289	2015	1	2	9	70	24	1	306	NC304xOh7B	DRIL68.006	NA	7	5.5	NA	NA	NA	NA	6.3

## Sheet: Geno
		Public Name	PZA02129-1	PHM13094-8	PZA00175-2	PZA00566-5	PHM13619-5	PZA02921-9	PHM835-25	PHM4313-17	PZA00294-20	PHM1950-71	PHM9418-11	PHM4695-5	PHM2187-34	PHM2187-46	PHM3147-18	PHM1968-22	PHM3627-11	PHM1438-34	PHM759-24	PHM4942-12	PZA00664-3	PZA00137-2	PZA03064-6	PHM16605-19	PHM5526-25	PZA02812-43	PZA00364-2	PZB00114-1	PZA01978-23	PHM18705-23	PHM13191-8	PZA00623-2	PZA02359-10	PHM9807-9	PZA00050-9	PHM1317-17	PHM7616-35	PZA00680-3	PHM5817-15	PHM1511-14	PHM5628-11	PZA00200-8	PZA00237-2	PZA01753-1	PZA03559-1	PHM7964-27	PZA00061-1
		PublicV3_CHR	1	1	1	1	1	1	1	1	1	1	1	1	1	1	1	1	1	1	1	1	1	1	1	1	1	1	1	1	1	1	1	1	1	1	1	1	1	2	2	2	2	2	2	2	2	2	2
		PublicV3_POS	3726823	8348403	8553473	9751470	22252464	24939913	34722268	45668597	63894962	67857305	97687107	144982957	157149149	157149026	182119770	183832593	208780661	213031139	226233566	227166659	228256403	248798890	249478228	251204469	262785553	268624436	269091401	277061165	277668430	285721372	292594359	294809306	295098628	295508151	296655989	298488225	299276975	1096967	1271925	2501128	4195757	5825207	6054619	14848100	15901262	23941440	33974182
		IBM4_CHR	1	1	1	1	1	1	1	1	1	1	1	1	1	1	1	1	1	1	1	1	1	1	1	1	1	1	1	1	1	1	1	1	1	1	1	1	1	2	2	2	2	2	2	2	2	2	2
		IBM4_cM	5.98	25.64	25.86	27.45	47.76	51.77	67.49	87.14	99.26	101.71	116.2	118.88	121.1	121.1	130.53	132.3	172.76	174.76	193.56	193.75	193.8	210.54	210.57	211.26	221.8	222.83	224.3	231.08	231.42	243.35	255	260.32	261.84	264	269.16	276.23	276.49	3.78	4.15	10.08	18.12	25.88	27.62	50	53.08	75.72	83.14
		MinMkr	IDP1447_5.600000	umc1977_25.600000	umc1977_25.600000	IDP1437_26.900000	IDP673_46.800000	bnlg1953_49.600000	umc1073_65.100000	AY110640_85.800000	AY110330_98.100000	IDP2553_101.600000	mmp39_116.200000	umc1076_117.900000	AY110396_121.100000	AY110396_121.100000	umc1812_129.500000	IDP1951_132.300000	AY111834_172.200000	IDP243_174.700000	IDP4061_193.500000	IDP4061_193.500000	AY110191_193.800000	umc1991_210.400000	umc1991_210.400000	AY109506_210.600000	IDP437_221.800000	IDP4018_221.800000	IDP261_224.300000	BE639426_229.800000	BE639426_229.800000	IDP823_239.600000	AY110479_253.600000	IDP772_259.100000	IDP772_259.100000	IDP772_259.100000	umc1331_267.500000	IDP603_276.200000	IDP603_276.200000	umc2246_3.500000	umc2246_3.500000	IDP53_5.300000	umc1165_15.500000	umc1265_24.400000	AY109603_26.400000	AY106040_50.000000	AY106040_50.000000	AI920398_75.200000	AY110266_83.100000
		MaxMkr	IDP1464_6.700000	IDP1437_26.900000	IDP1437_26.900000	IDP847_28.400000	bnlg1953_49.600000	IDP466_52.100000	bnlg1484_67.800000	AY110632_87.600000	IDP2553_101.600000	IDP511_102.600000	AY111680_116.200000	AY110396_121.100000	umc1906_121.100000	umc1906_121.100000	umc1590_131.100000	IDP846_135.400000	IDP243_174.700000	IDP641_177.400000	AY110191_193.800000	AY110191_193.800000	IDP408_193.800000	cdj2_210.600000	cdj2_210.600000	IDP630_211.500000	IDP3773_221.800000	IDP261_224.300000	IDP1636_224.300000	IDP2395_233.200000	IDP2395_233.200000	mmp195g_245.700000	umc1744_255.600000	umc2045_265.800000	umc2045_265.800000	umc2045_265.800000	bnl6.32_275.300000	END_Zmchr1_277.200000	END_Zmchr1_277.200000	IDP2371_5.300000	IDP2371_5.300000	IDP776_11.200000	IDP677_18.300000	AY109603_26.400000	IDP3972_28.600000	IDP591_53.200000	IDP591_53.200000	IDP1968_78.000000	mmp167_83.400000
Pedigree	Entry	Polymor	-	-	-	-	-	-	-	-	-	-	-	-	-	-	-	-	-	-	-	-	-	-	-	-	-	-	-	-	-	-	-	-	-	-	-	-	-	-	-	-	-	-	-	-	-	-	-
	Oh7B	.	C	C	A	A	T	C	G	C	C	A	T	T	C	T	C	G	G	C	A	T	G	T	G	C	A	T	A	T	C	G	C	C	C	C	A	C	A	A	G	G	A	C	G	C	C	A	T
	NC304	.	T	T	T	G	G	T	C	T	T	T	C	C	G	A	T	A	C	T	G	C	A	C	A	T	C	G	T	C	T	A	T	G	T	G	G	-	G	C	A	A	C	G	A	A	T	T	C
	Heter		C/T	C/T	A/T	A/G	T/G	C/T	G/C	C/T	C/T	A/T	T/C	T/C	C/G	T/A	C/T	G/A	G/C	C/T	A/G	T/C	G/A	T/C	G/A	C/T	A/C	T/G	A/T	T/C	C/T	G/A	C/T	C/G	C/T	C/G	A/G	C/-	A/G	A/C	G/A	G/A	A/C	C/G	G/A	C/A	C/T	A/T	T/C
	Heter	.	T/C	T/C	T/A	G/A	G/T	T/C	C/G	T/C	T/C	T/A	C/T	C/T	G/C	A/T	T/C	A/G	C/G	T/C	G/A	C/T	A/G	C/T	A/G	T/C	C/A	G/T	T/A	C/T	T/C	A/G	T/C	G/C	T/C	G/C	G/A	-/C	G/A	C/A	A/G	A/G	C/A	G/C	A/G	A/C	T/C	T/A	C/T
NC304 x Oh7B BC3F4:5	DRIL 68.002	.	C	C	A	A	T	C	G	C	C	A	T	T	C	T	C	G	G	C	A	T	G	T	G	C	C	T	A	T	C	G	C	C	C	C	A	C	A	A	G	G	A	C	G	C	C	A	T
NC304 x Oh7B BC3F4:5	DRIL 68.003	.	C	C	A	A	T	C	G	C	C	A	T	T	C	-	C	G	G	C	A	T	G	T	G	C	A	T	A	T	C	G	C	C	C	C	A	C	A	A	G	G	A	C	G	C	C	A	T
NC304 x Oh7B BC3F4:5	DRIL 68.004	.	C	C	A	A	T	C	G	C	C	A	T	T	C	T	C	G	G	C	A	T	G	T	G	C	A	T	A	T	C	G	C	C	C	C	A	C	A	A	G	G	A	C	G	C	C	A	C
NC304 x Oh7B BC3F4:5	DRIL 68.005	.	C	C	A	A	T	C	G	C	C	A	T	T	C	T	C	G	G	C	A	T	G	T	G	C	A	T	A	T	C	G	C	C	C	C	A	C	A	A	G	G	A	C	G	C	C	A	T
NC304 x Oh7B BC3F4:5	DRIL 68.006	.	C	C	A	A	T	C	G	C	C	A	T	T	C	T	C	G	G	C	A	T	G	T	G	C	A	T	-	-	T	G	C	C	C	C	A	C	A	A	G	G	A	C	G	C	C	A	T
NC304 x Oh7B BC3F4:5	DRIL 68.007	.	C	C	A	A	T	C	G	C	C	A	T	T	C	T	C	G	G	C	A	T	G	T	G	C	A	T	A	T	C	G	C	C	C	C	A	C	A	A	G	G	A	C	G	C	C	A	T
NC304 x Oh7B BC3F4:5	DRIL 68.008	.	C	C/T	-	A	T	C	G	C	C/T	-	T	T	C	T	C	G	G	C	A	T	G	T	G	C	A	T	A	T	C	G	C	C	C	C	A	C	A	A	G	G	A	C	G	C	C	A	T
NC304 x Oh7B BC3F4:5	DRIL 68.010	.	T	C	A	A	T	C	G	C	C	A	C	C	G	A	T	G	G	C	A	T	G	T	G	C	A	T	A	T	C	G	C	C	C	C	A	C	A	A	G	G	A	C	G	A	T	-	C/T
NC304 x Oh7B BC3F4:5	DRIL 68.012	.	C	C	A	A	T	C	G	C	C	A	T	T	C	T	C	G	C	T	A	T	G	T	G	C	A	T	A	T	C	G	C	C	C	C	A	C	A	A	G	G	A	C	G	C	C	A	T
NC304 x Oh7B BC3F4:5	DRIL 68.014	.	C	C	A	A	T	C	G	C	C	A	C	C	G	A	T	A	C	C	A	T	G	T	G	C	A	T	A	T	C	G	C	C	C	C	A	C	A	A	G	G	A	C	G	C	C	A	T
NC304 x Oh7B BC3F4:5	DRIL 68.015	.	C	C	A	A	T	C	G	C	C	A	T	T	C	T	C	G	G	C	A	T	G	T	G	C	A	T	A	T	C	A	T	G	T	G	G	-	G	A	G	G	A	C	G	C	C	A	T
NC304 x Oh7B BC3F4:5	DRIL 68.016	.	C	C	A	A	T	C	G	C	C	A	T	T	C	T	C	G	G	C	A	T	G	T	G	C	A	T	A	T	C	G	C	C	C	C	A	C	A	A	G	G	A	C	G	C	C	A	T
NC304 x Oh7B BC3F4:5	DRIL 68.017	.	C	C	A	A	T	C	G	C	C	A	T	T	C	T	C	G	G	C	A	T	G	T	G	C	A	T	A	T	C	G	C	C	C	C	A	C	A	A	G	G	A	C	G	C	C	A	T
NC304 x Oh7B BC3F4:5	DRIL 68.018	.	C	C	A	A	T	C	G	C	C	A	T	T	C	T	C	G	G	C	A	T	G	T	G	C	A	T	A	T	C	G	C	C	C	C	A	C	A	A	G	G	A	C	G	C	C	T	C
NC304 x Oh7B BC3F4:5	DRIL 68.019	.	C	C	A	A	T	C	G	C	C	A	T	T	C	T	C	G	G	C	A	T	G	T	G	C	A	T	A	T	C	G	C	C	C	C	A	C	A	A	G	G	A	C	G	C	C	T	C
NC304 x Oh7B BC3F4:5	DRIL 68.021	.	C	C	A	A	T	C	G	C	C	A	C	C	G	A	T	A	C	T	G	C	A	T	G	C	A	T	A	T	C	A	C	C	C	C	A	C	A	A	G	G	A	C	G	C	C	A	T
NC304 x Oh7B BC3F4:5	DRIL 68.022	.	C	C	A	A	G	T	G	C	C	A	T	T	C	T	C	G	G	C	A	T	G	C	A	T	A	T	A	T	C	G	C	C	C	C	A	C	A	A	G	G	A	C	G	C	C	A	T
NC304 x Oh7B BC3F4:5	DRIL 68.023	.	T	T	T	G	T	C	G	C	C	A	T	T	C	T	C	G	G	C	A	T	G	T	G	C	A	T	A	T	C	G	C	C	C	C	A	C	A	A	G	G	A	C	G	C	C	A	T
NC304 x Oh7B BC3F4:5	DRIL 68.024	.	C	C	A	A	G	T	C	T	T	T	C	C	G	A	T	A	G	C	A	T	G	T	G	C	A	T	A	T	C	G	C	C	C	C	A	C	A	A	G	G	A	C	G	C	C	A	T
NC304 x Oh7B BC3F4:5	DRIL 68.025	.	C	C	A	A	G	T	C	T	C	A	T	T	C	T	C	G	G	C	A	T	G	T	G	C	A	T	A	T	C	G	C	C	C	C	A	C	A	A	G	G	A	C	G	C	C	A	T
NC304 x Oh7B BC3F4:5	DRIL 68.026	.	C	C	A	A	T	C	G	C	C	A	T	T	C	T	C	G	G	C	A	T	G	T	G	C	A	T	A	T	C	G	C	C	C	C	A	C	A	A	G	G	A	C	G	C	C	T	T
NC304 x Oh7B BC3F4:5	DRIL 68.027	.	C	C	A	A	T	C	G	C	C	A	C/T	C/T	C	T	C	G	G	C	A	T	G	T	G	C	A	T	A	T	C	G	C	C	C	G	A	C	A	A	G	G	A	C	G	C	C	A	T
NC304 x Oh7B BC3F4:5	DRIL 68.028	.	C	C	A	A	T	C	G	C	C	A	T	T	C	T	C	G	G	C	A	T	G	T	G	C	A	T	A	T	C	A	C	G	T	G	A	C	A	A	G	G	C	G	A	C	C	A	T
NC304 x Oh7B BC3F4:5	DRIL 68.029	.	C	C	A	A	G	T	C	T	C	A	T	T	C	T	C	G	G	C	A	T	G	T	G	C	A	T	A	T	C	G	C	C	C	C	A	C	A	A	G	G	A	C	G	C	C	T	T
NC304 x Oh7B BC3F4:5	DRIL 68.030	.	C	C	A	A	T	C	G	C	C	A	T	T	C	T	C	G	G	C	A	T	G	T	G	C	A	T	A	T	C	G	C	C	C	C	A	C	A	A	G	G	A	C	G	C	C	T	C
NC304 x Oh7B BC3F4:5	DRIL 68.031	.	C	C	A	A	T	C	G	C	C	A	T	T	C	T	C	G	G	C	A	T	G	T	G	C	A	T	A	T	C	G	C	C	C	C	A	C	A	A	G	G	A	C	G	C	C	A	T
NC304 x Oh7B BC3F4:5	DRIL 68.032	.	C	C	A	A	T	C	G	C	C	A	T	T	C	T	C	G	G	C	A	T	G	T	G	C	A	T	A	T	C	G	C	C	C	C	A	C	A	A	G	G	A	C	G	C	C	A	T
NC304 x Oh7B BC3F4:5	DRIL 68.033	.	C	C	A	A	T	C	G	C	C	A	T	T	C	T	C	G	G	C	A	T	G	T	G	C	A	T	A	T	C	G	C	C	C	C	A	C	A	A	G	G	A	C	G	C	C	A	T
NC304 x Oh7B BC3F4:5	DRIL 68.034	.	T	T	T	G	G	T	-	-	T	T	C	C	G	A	C	A	C	T	G	C	A	C	A	T	C	G	T	T	C	G	C	C	C	C	A	C	A	A	G	G	A	C	G	C	C	A	T
NC304 x Oh7B BC3F4:5	DRIL 68.035	.	C	C/T	-	A	T	C	G	C	C	A	T	T	C	T	C	G	G	C	A	T	G	T	G	C	A	T	A	T	C	G	C	C	C	C	A	C	A	A	G	G	A	C	G	C	C	A	T
NC304 x Oh7B BC3F4:5	DRIL 68.036	.	C	C	A	A	T	C	G	C	C	A	T	T	C	T	C	G	G	C	A	T	G	T	G	C	A	T	A	T	C	G	C	C	C	C	A	C	A	A	G	G	A	C	G	C	C	A	T
NC304 x Oh7B BC3F4:5	DRIL 68.037	.	C	C	A	A	T	C	G	C	C	A	T	T	C	T	C	G	G	C	A	T	G	T	G	C	A	T	A	T	C	G	C	C	C	C	A	C	A	A	G	G	A	C	G	C	C	A	T
NC304 x Oh7B BC3F4:5	DRIL 68.038	.	C	C	A	A	T	C	G	C	C	A	T	T	C	T	C	G	G	C	A	T	G	T	G	C	A/C	T	A	T	C/T	G	C	C	C	C	A	C	A	A	G	G	A	C	G	C	C	A	T
NC304 x Oh7B BC3F4:5	DRIL 68.039	.	C	C	A	A	T	C	G	C	C	A	T	T	C	T	C	G	G	C	A	T	G	T	G	T	A	T	A	T	C	G	C	C	C	C	A	C	A	A	G	G	A	C	G	C	C	A	T
NC304 x Oh7B BC3F4:5	DRIL 68.040	.	C	C	A	A	T	C	G	C	C	A	T	T	C	T	C	G	G	C	A	T	G	T	G	C	A	T	A	T	C	G	C	C	C	C	A	C	A	A	G	G	A	C	G	C	C	A	C
NC304 x Oh7B BC3F4:5	DRIL 68.041	.	C	C	A	A	T	C	G	C	C	A	T	T	C	T	C	G	C	T	A	T	G	T	G	C	A	T	A	T	C	G	T	G	T	G	A	C	A	A	G	G	A	C	G	C	C	A	T
NC304 x Oh7B BC3F4:5	DRIL 68.042	.	C	C	A	A	G	T	G	C	C	A	T	T	C	T	C	G	G	C	A	T	G	T	G	C	A	T	A	T	C	A/G	C	C	C	C	A	C	A	A	G	G	A	C	G	C	C	A	T
NC304 x Oh7B BC3F4:5	DRIL 68.043	.	C	C	A	A	T	C	G	C	T	T	T	T	C	T	C	G	G	C	A	T	G	T	G	C	A	T	A	T	C	G	C	C	C	C	A	C	A	A	G	G	A	C	G	C	C	A	T
NC304 x Oh7B BC3F4:5	DRIL 68.044	.	C	C	A	A	T	C	G	C	C	A	T	T	C	T	C	G	G	C	A	T	G	T	G	C	A	T	A	T	C	G	C	C	C	C	A	C	A	A	G	G	A	C	G	C	C	A	T
NC304 x Oh7B BC3F4:5	DRIL 68.046	.	C	C	A	A	T	C	G	C	C	A	T	T	C	T	C	G	G	C	A	T	G	T	G	C	A	T	A	T	C	G	C	C	C	C	A	C	A	A	G	G	A	C	G	C	C	A	T
NC304 x Oh7B BC3F4:5	DRIL 68.047	.	C	C	A	A/G	T	C	G	C	C	A	T	T	C	T	C	G	G	C	A	T	G	T	G	C	A	T	A	T	C	G	T	G	T	G	G	-	G	A	G	G	A	C	G	C	C	A	T
NC304 x Oh7B BC3F4:5	DRIL 68.048	.	C	C	A	A	T	C	G	C	C	A	T	T	C	T	C	G	G	C	A	T	G	T	G	C	A	T	A	T	C	G	C	C	C	C	A	C	A	A	G	G	A	C	G	C	C	A	T
NC304 x Oh7B BC3F4:5	DRIL 68.049	.	C	C	A	A	T	C	G	C	C	A	T	T	C	T	C	G	G	C	A	T	G	C	A	T	A	T	A	T	C	G	C	C	C	C	A	C	A	A	G	G	A	C	G	C	C	A	T
NC304 x Oh7B BC3F4:5	DRIL 68.051	.	C	C	A	A	T	C	G	C	C	A	T	T	G	A	C	G	G	C	A	T	G	T	G	C	A	T	A	T	C	G	C	C	C	C	A	C	A	A	G	G	A	C	G	C	C	A	T
NC304 x Oh7B BC3F4:5	DRIL 68.052	.	C	C	A	A	T	C	G	C	C	A	T	T	C	T	C	G	G	C	A	T	G	T	G	C	A	T	A	T	C	G	C	C	C	C	A	C	A	A	G	G	A	C	G	C	C	A	T
NC304 x Oh7B BC3F4:5	DRIL 68.053	.	C	C	A	A	T	C	G	C	C	A	T	T	C	T	C	G	G	C	A	T	G	T	G	C	A	T	A	T	C	G	C	C	C	C	A	C	A	A	G	G	A	C	G	C	C	A	T
NC304 x Oh7B BC3F4:5	DRIL 68.054	.	C	C	A	A	G	T	C	-	C	A	T	T	C	T	C	G	C	T	G	C	A	T	G	C	A	T	A	T	C	G	C	C	C	C	A	C	A	A	G	G	A	C	G	C	C	A	T
NC304 x Oh7B BC3F4:5	DRIL 68.055	.	C	C	A	A	G	T	C	T	C	A	T	T	C	T	C	G	G	C	A	T	G	T	G	C	A	-	-	C	T	G	C	C	C	C	A	C	A	A	G	G	A	C	G	C	C	A	T
NC304 x Oh7B BC3F4:5	DRIL 68.056	.	T	T	T	G	G	T	C	T	T	A	T	T	C	T	C	G	G	C	A	T	G	T	G	C	A	T	A	T	C	G	C	C	C	C	A	C	A	A	G	G	A	C	G	C	C	A	C
NC304 x Oh7B BC3F4:5	DRIL 68.060	.	C	C	A	A	T	C	G	C	C	A	T	T	C	T	C	G	G	C	A	T	G	T	G	C	A	T	A	T	C	G	C	C	C	C	A	C	A	A	G	G	A	C	G	C	C	A	T
NC304 x Oh7B BC3F4:5	DRIL 68.061	.	C	C	A	A	T	C	G	C	C	A	T	T	C	T	C	G	G	C	A	T	G	T	G	C	A	T	A	T	C	G	C	C	C	C	A	C	A	A	G	G	C	G	A	C	C	A	T
NC304 x Oh7B BC3F4:5	DRIL 68.062	.	C	C	A	A	T	C	G	C	C	A	T	T	C	T	C	G	G	C	A	T	G	T	G	C	A	T	A	T	C	G	C	C	C	C	A	C	A	A	G	G	A	C	G	C	C	A	T
NC304 x Oh7B BC3F4:5	DRIL 68.063	.	C	C	A	A	T	C	G	C	C	A	T	T	C	T	C	G	G	C	A	T	G	T	G	C	A	T	A	T	C	G	T	G	T	G	A	C	A	A	G	G	A	C	G	C	C	A	T
NC304 x Oh7B BC3F4:5	DRIL 68.064	.	C	C	A	A	T	C	G	C	C	A	T	T	C	T	C	G	G	C	A	T	G	T	G	C	A	T	A	T	C	G	C	C	C	C	A	C	A	C	A	G	A	C	G	C	C	A	T
NC304 x Oh7B BC3F4:5	DRIL 68.067	.	C	C	A	A	T	C	G	C	C	A	T	T	C	T	C	G	G	C	A	T	G	T	G	C	A	T	A	T	C	G	C	C	C	C	A	C	A	A/C	A	A	C	G	G	C	C	A	T
NC304 x Oh7B BC3F4:5	DRIL 68.068	.	C	C	A	A	G	T	G	C	C	A	T	T	C	T	C	G	G	C	A	T	G	T	G	C	A	T	A	T	C	G	C	C	C	C	A	C	A	A	G	G	A	C	G	C	C	A	T
NC304 x Oh7B BC3F4:5	DRIL 68.069	.	C	C	A	A	T	C	G	C	C	A	T	T	C	T	C	G	G	C	A	T	G	T	G	C	A	T	A	T	C	G	T	G	T	G	A	C	A	A	G	G	A	C	G	C	C	A	T
NC304 x Oh7B BC3F4:5	DRIL 68.070	.	C	C	A	A	T	C	G	C	C	A	T	T	C	T	C	G	G	C	A	T	G	T	G	C	A	T	A	T	C	G	C	C	C	C	A	C	A	A	G	G	A	C	G	C	C	A	C
NC304 x Oh7B BC3F4:5	DRIL 68.071	.	C	C	A	A	T	T	G	C	C	A	T	T	C	T	C	G	C	T	G	C	A/G	C	A	T	C	G	T	C	T	A	T	G	T	G	A	C	A	A	G	G	A	C	G	C	C	A	T
NC304 x Oh7B BC3F4:5	DRIL 68.072	.	C	C	A	A	T	C	G	C	C	A	T	T	C	T	C	G	G	C	A	T	G	C	A	T	C	G	T	C	T	G	C	C	C	C	A	C	A	C	A	G	A	C	G	C	C	A	T
NC304 x Oh7B BC3F4:5	DRIL 68.073	.	C	C	A	A	T	C	G	C	C	A	T	T	C	T	C	G	G	C	A	T	G	T	G	C	A	T	A	T	C	G	C	C	C	C	A	C	A	A	G	G	A	C	G	C	C	A	T
NC304 x Oh7B BC3F4:5	DRIL 68.074	.	C	C	A	A	T	T	C	C	C	A	T	T	C	T	C	G	C	T	G	C	A	C	A	T	C	G	T	C	T	A	T	-	C/T	C/G	A	C	A	A	G	G	A	C	G	C	C	A	T
NC304 x Oh7B BC3F4:5	DRIL 68.075	.	-	T	T	A	-	C/T	G	C	C	A	T	T	C	T	C	G	G	C	A	T	G	T	G	C	A	T	A	T	C	G	C	C	C	C	A	C	A	A	G	G	A	C	G	C	C	A	T
NC304 x Oh7B BC3F4:5	DRIL 68.076	.	C	C	A	A	T	C	G	C	C	A	T	T	C	T	C	G	G	C	A	T	G	T	G	C	A	T	A	T	C	G	C	C	C	C	A	C	A	A	G	G	A	C	G	C	C	A	T
NC304 x Oh7B BC3F4:5	DRIL 68.077	.	C	C	A	A	T	C	G	C	C	A	T	T	C	T	C	G	G	C	A	T	G	T	G	C	A	T	A	T	C	G	C	C	C	C	A	C	A	A	G	G	C	G	A	C	C	A	T
NC304 x Oh7B BC3F4:5	DRIL 68.078	.	C	C	A	A	T	C	G	C	C	A	T	T	C	T	C	G	G	C	A	T	G	T	G	C	A	T	A	T	C	G	C	C	C	C	A	C	A	A	G	G	A	C	G	C	C	A	T
NC304 x Oh7B BC3F4:5	DRIL 68.080	.	C	C	A	A	T	C	G	C	C	A	T	T	C	T	C	G	G	C	A	T	G	T	G	C	A	T	A	T	C	G	C	C	C	C	A	C	A	C	A	A	C	G	A	C	C	A	T
NC304 x Oh7B BC3F4:5	DRIL 68.081	.	C	C	A	A	T	C	G	C	C	A	T	T	C	T	C	G	G	C	A	T	G	T	G	C	A	T	A	T	C	G	C	C	C	C	A	C	A	A	G	G	A	C	G	C	C	A	T
NC304 x Oh7B BC3F4:5	DRIL 68.082	.	T	C	A	A	T	C	G	C	C	A	C	C	G	A	T	A	G	C	A	T	G	T	G	C	A	T	A	C	T	G	C	C	C	C	A	C	A	C	A	A	C	G	A	C	C	A	T
NC304 x Oh7B BC3F4:5	DRIL 68.083	.	T	C	A	A	T	C	G	C	C	A	C	C	G	A	-	A	G	C	A	T	G	T	G	C	A	T	A	T	C	G	C	C	C	C	A	C	A	C	A	A	C	G	A	C	C	A	T
NC304 x Oh7B BC3F4:5	DRIL 68.084	.	T	T	T	G	T	C	G	C	C	A	T	T	C	T	C	G	G	C	A	T	G	T	G	C	A	T	A	T	C	G	C	C	C	C	A	C	A	A	G	G	A	C	G	C	C	A	T
NC304 x Oh7B BC3F4:5	DRIL 68.085	.	C	C	A	A	T	C	G	C	C	A	T	T	C	T	C	G	G	C	A	T	G	T	G	C	A	T	A	T	C	G	C	C	C	C	A	C	A	A	G	G	A	C	G	C	C	A	T
NC304 x Oh7B BC3F4:5	DRIL 68.086	.	C	C	A	A	T	C	G	C	C	A	T	T	C	T	C	G	G	C	A	T	G	T	G	C	A	T	A	T	C	G	C	C	C	C	A	-	G	A	G	G	A	C	G	C	C	A	T
NC304 x Oh7B BC3F4:5	DRIL 68.087	.	C	C	A	A	T	C	G	C	C	A	T	T	C	T	C	G	G	C	A	T	G	T	G	C	A	T	A	T	C	G	C	C	C	C	A	C	A	A	G	G	A	C	G	C	C	A	T
NC304 x Oh7B BC3F4:5	DRIL 68.088	.	C	C	A	A	G	T	G	C/T	C/T	-	T	-	G	A/T	T	A	G	C	A	T	G	T	G	C	A	T	A	C	T	A	T	G	T	C	G	-	G	A	G	G	A	C	G	C	C	A	T
NC304 x Oh7B BC3F4:5	DRIL 68.089	.	C	C	A	A	T	C	G	C	C	A	T	T	C	T	C	G	C	C	A/G	C/T	A/G	T	G	C	A	T	A	T	C	G	C	C	C	C	A	C	A	A	G	G	A	C	G	C	C	A	T
NC304 x Oh7B BC3F4:5	DRIL 68.090	.	C	C	A	A	T	C	G	C	C	A	T	T	C	T	C	G	G	C	A	T	G	T	G	C	A	T	A	T	C	G	C	C	C	C	A	C	A	A	G	G	A	C	G	C	C	A	T
NC304 x Oh7B BC3F4:5	DRIL 68.091	.	C	C	A	A	T	C/T	G	C	C	A	T	T	C	T	C	G	G	C	A	T	G	T	G	C	A	T	A	T	C	G	C	C	C	C	A	C	A	A	G	G	A	C	G	C	C	A	T
NC304 x Oh7B BC3F4:5	DRIL 68.092	.	C	C	A	A	T	C	G	C	C	A	T	T	C	T	C	G	G	C	A	T	G	T	G	C	A	T	A	T	C	G	C	C	C	C	A	C	A	A	G	G	A	C	G	C	C	A	T
NC304 x Oh7B BC3F4:5	DRIL 68.094	.	T	C	A	A	T	C	G	C	C	A	T	T	C	T	C	G	G	C	A	T	G	T	G	C	A	T	A	T	C	G	C	C	C	C	A	C	A	A	G	G	A	C	G	C	C	A	T
NC304 x Oh7B BC3F4:5	DRIL 68.095	.	C	T	T	A	T	C	G	C	C	A	T	T	C	T	C	G	G	C	A	T	G	T	G	C	A	T	A	T	C	G	C	C	C	G	A	C	A	A	G	G	A	C	G	C	C	A	-
NC304 x Oh7B BC3F4:5	DRIL 68.096	.	C	C	A	A	T	C	G	C	C	A	T	T	C	T	C	G	-	T	G	C	A	C	G	C	A	T	A	T	C	G	C	C	C	C	A	C	A	C	G	G	A	C	G	C	C	T	C
NC304 x Oh7B BC3F4:5	DRIL 68.097	.	C	C	A	A	T	C	G	C	C	A	T	T	C	T	C	G	G	C	A	T	G	T	G	C	A	T	A	T	C	G	C	C	C	C	A	C	A	A	G	G	A	C	G	C	C	A	T
NC304 x Oh7B BC3F4:5	DRIL 68.098	.	C	C	A	A	T	C	G	C	C	A	T	T	C	T	C	G	G	C	A	T	G	T	G	C	A	T	A	T	C	G	C	C	C	C	A	C	A	A	G	G	A	C	G	C	C	A	T
NC304 x Oh7B BC3F4:5	DRIL 68.099	.	C	C	A	A	T	C	G	C	C	A	T	T	C	T	C	G	G	C	A	T	G	T	G	C	A	T	A	T	C	G	C	C	C	C	A	C	A	A	G	G	A	C	G	C	C	A	T
NC304 x Oh7B BC3F4:5	DRIL 68.100	.	C	C	A	A	T	C	G	C	C	A	C	C	C	T	C	G	G	C	A	T	G	T	G	C	A	T	A	T	C	G	C	C	C	C	A	C	A	A	G	G	A	C	G	C	C	T	C
NC304 x Oh7B BC3F4:5	DRIL 68.101	.	C	C	A	A	G	C	G	C	C	A	T	T	C	T	C	G	G	C	A	T	G	T	G	C	A	T	A	T	C	G	C	C	C	C	A	C	A	A	G	G	A	C	G	C	C	A	T
NC304 x Oh7B BC3F4:5	DRIL 68.102	.	C	C	A	A	T	C	G	C	C	A	T	T	C	T	C	G	G	C	A	T	G	T	G	C	C	G	T	T	C	G	C	C	C	C	A	C	A	A	G	G	A	C	G	C	C	A	T
NC304 x Oh7B BC3F4:5	DRIL 68.103	.	C	C	A	A	T	C	G	C	C	A	T	T	C	T	C	G	G	C	A	T	G	T	G	C	A	T	A	T	C	G	C	C	C	G	A	C	A	C	A	A	A	C	G	C	C	A	T
NC304 x Oh7B BC3F4:5	DRIL 68.104	.	C	C	A	A	T	C	G	C	C	A	T	T	C	T	C	G	G	C	A	T	G	T	G	C	A	T	A	T	C	G	C	C	C	G	A	C	A	C	G	G	A	C	G	C	C	A	T
NC304 x Oh7B BC3F4:5	DRIL 68.105	.	C	C	A	A	T	C	G	C	C	A	C	C	G	A	C	G	G	C	A	T	G	T	G	C	A	T	A	T	C	G	T	G	T	G	G	-	-	A	G	G	A	C	G	C	C	A	T
NC304 x Oh7B BC3F4:5	DRIL 68.106	.	C	C	A	G	T	C	G	C	C	A	T	T	C	T	C	G	G	C	A	T	G	T	G	C	A	T	A	T	C	G	C	G	T	G	G	-	G	A	G	G	A	C	G	C	C	A	T
NC304 x Oh7B BC3F4:5	DRIL 68.108	.	T	T	T	A	T	C	G	C	C	A	T	T	C	T	C	G	G	C	A	T	G	T	G	C	A	T	A	T	C	G	C	C	C	G	A	C	A	A	G	G	A	C	G	C	C	-	C
NC304 x Oh7B BC3F4:5	DRIL 68.109	.	C	T	T	-	T/G	C/T	-	C/T	-	A	C	C	C	T	C	G	G	C	A	T	G	T	G	C	A	T	A	T	C	G	C	C	C	C	A	C	A	A	G	G	A	C	G	C	C	A	T
NC304 x Oh7B BC3F4:5	DRIL 68.111	.	C	C	A	A	T	C	G	C	C	A	T	T	C	T	C	G	G	C	A	T	G	T	G	C	A	T	A	T	C	G	C	C	C	C	A	C	A	A	G	G	A	C	G	C	C	A	T
NC304 x Oh7B BC3F4:5	DRIL 68.112	.	C	C	A	A	T	C	G	C	-	-	C	C	G	A	-	A	C	T	G	C	A	C	A	T	A	T	A	T	C	A	T	G	T	G	A	C	A	A	G	G	A	C	G	C	C	A	T
NC304 x Oh7B BC3F4:5	DRIL 68.114	.	C	C	A	A	T	C	G	C	C	A	T	T	C	T	C	G	G	C	A	T	G	T	G	C	A	T	A	T	C	G	C	C	C	C	A	C	A	A	G	G	A	C	G	C	C	A	T
NC304 x Oh7B BC3F4:5	DRIL 68.115	.	C	C/T	A/T	A/G	G/T	C/T	G	C	C	A	T	T	C	T	C	G	G	C	A	T	G	T	G	C	A	T	A	T	C	G	C	C	C	C	A	C	A	A	G	G	A	C	G	C	C	A	T
NC304 x Oh7B BC3F4:5	DRIL 68.116	.	C	C	A	A	T	C	G	C	C	A	T	T	C	T	C	G	G	C	A	T	G	T	G	C	A	T	A	T	C	G	C	C	C	G	A	C	A	A	G	G	A	C	G	C	C	A	T
NC304 x Oh7B BC3F4:5	DRIL 68.117	.	C	C	A	A	T	C	G	C	C	A	T	T	C	T	C	G	G	C	A	T	G	T	G	C	A	T	A	T	C	G	T	G	T	G	G	-	G	A	G	G	A	C	G	C	C	A	T
NC304 x Oh7B BC3F4:5	DRIL 68.118	.	-	T	T	A	G	T	G	C	C	A	T	T	C	T	C	G	G	C	A	T	G	T	G	C	A	T	A	T	C	A	C	C	C	C	A	C	A	C	G	G	A	C	G	C	C	A	T
NC304 x Oh7B BC3F4:5	DRIL 68.119	.	C	C	A	A	T	C	G	C	C	A	T	T	C	T	C	G	G	C	A	T	G	T	G	C	A	T	A	T	C	G	C	C	C	C	A	C	A	C	A	A	C	G	A	A	T	T	C
NC304 x Oh7B BC3F4:5	DRIL 68.121	.	C	C	A	A	T	C	G	C	C	A	T	T	C	T	C	G	G	C	A	T	G	T	G	C	A	T	A	T	C	G	C	C	C	C	A	C	A	A	G	G	A	C	G	C	C	A	T
NC304 x Oh7B BC3F4:5	DRIL 68.122	.	C	T	T	A	G	T	G	T	C	A	T	T	C	T	C	G	G	C	A	T	G	T	G	C	A	T	A	T	C	A/G	C	C	C	C	A	C	A	A	G	G	A	C	G	C	C	A	T
NC304 x Oh7B BC3F4:5	DRIL 68.123	.	C	C	A	A	T	C	G	C	C	A	T	T	C	T	C	G	G	C	A	T	G	T	G	C	A	T	A	T	C	G	C	C	C	C	A	C	A	A	G	A	C	G	A	A	T	T	C
NC304 x Oh7B BC3F4:5	DRIL 68.125	.	C	C	A	A	T	C	G	C	C	A	T	T	C	T	C	G	G	C	A	T	G	T	G	C	A	T	A	T	C	G	C	C	C	G	A	C	A	A	G	G	A	G	A	A	T	T	C
NC304 x Oh7B BC3F4:5	DRIL 68.126	.	C	C	A	A	T	C	G	C	C	A	T	T	C	T	C	G	G	C	G	C	A	C	A	T	C	G	T	C	T	-	C	C	C	C	A	C	A	A	G	G	A	C	G	C	C	A	T
NC304 x Oh7B BC3F4:5	DRIL 68.127	.	C	C	A	A/G	G/T	T	C	C	C	A	T	T	C	T	C	G	G	C	A	T	G	T	G	C	A	T	A	T	C	G	C	C	C	C	A	C	A	A	G	G	A	C	G	C	C	A	T
[truncated: 207 more columns]
